# Supplementary material for: An In-Vitro Study of the Expansion and Transcriptomics of CD4+ and CD8+ Naïve and Memory T Cells Stimulated by IL-2, IL-7 and IL-15
Source: MDPI journal article supplement (doi:10.3390/cells11101701), 2022-05-20
Supplement: s1 [file s1]

### **Supplementary Material S5:**

Table of CD4+ Naïve (CD4+/CD45RA+) T cell shift to Memory (CD4+/CD45RA-) Subset.  
Columns represent the percentage of cells in each category (naïve v. general memory subsets).  
Balance of each column is effector subset.

|           | Day 3 (%)    |              | Day 4 (%)    |              | Day 7 (%)    |              |
|-----------|--------------|--------------|--------------|--------------|--------------|--------------|
| Condition | CD4+/CD45RA+ | CD4+/CD45RA- | CD4+/CD45RA+ | CD4+/CD45RA- | CD4+/CD45RA+ | CD4+/CD45RA- |
| No Cyt    | 88.87        | 10.59        | 78.01        | 19.7         | 71.4         | 28.2         |
| 000       | 88.87        | 10.59        | 74.57        | 23.86        | 48.31        | 51.23        |
| 100       | 88.87        | 10.59        | 74.16        | 24.05        | 49.81        | 49.8         |
| 200       | 88.87        | 10.59        | 74.01        | 24.03        | 48.66        | 51.04        |
| 010       | 88.87        | 10.59        | 75.25        | 23.71        | 42.05        | 57.92        |
| 020       | 88.87        | 10.59        | 74.67        | 24.47        | 53.31        | 46.23        |
| 001       | 88.87        | 10.59        | 67.83        | 30           | 48.97        | 50.53        |
| 002       | 88.87        | 10.59        | 75.89        | 22.67        | 56.07        | 43.6         |
| 110       | 88.87        | 10.59        | 76.08        | 23.58        | 53.44        | 46.18        |
| 101       | 88.87        | 10.59        | 70.48        | 28.38        | 41.74        | 58           |
| 011       | 88.87        | 10.59        | 66.44        | 32.74        | 44.51        | 55.19        |
| 220       | 88.87        | 10.59        | 66.7         | 30.77        | 41.13        | 58.41        |
| 202       | 88.87        | 10.59        | 68.49        | 29.88        | 41.34        | 57.66        |
| 022       | 88.87        | 10.59        | 61.42        | 37.51        | 38.11        | 61.41        |
| 111       | 88.87        | 10.59        | 66.98        | 30.95        | 38.99        | 60.47        |
| 222       | 88.87        | 10.59        | 72.56        | 25.83        | 38.26        | 61.72        |

Table of CD8+ Naïve (CD8+/CD45RA+) T cell shift to Memory (CD8+/CD45RA-) Subset.  
Columns represent the percentage of cells in each category (naïve v. general memory subsets).  
Balance of each column is effector subset.

|           | Day 3 (%)    |              | Day 6 (%)    |              | Day 7 (%)    |              |
|-----------|--------------|--------------|--------------|--------------|--------------|--------------|
| Condition | CD8+/CD45RA+ | CD8+/CD45RA- | CD8+/CD45RA+ | CD8+/CD45RA- | CD8+/CD45RA+ | CD8+/CD45RA- |
| No Cyt    | 97.07        | 2.93         | 88.45        | 9.57         | 82.15        | 15.77        |
| 000       | 97.07        | 2.93         | 86.58        | 10.48        | 76.77        | 19.73        |
| 100       | 97.07        | 2.93         | 90.45        | 9.39         | 80.13        | 16.32        |
| 200       | 97.07        | 2.93         | 91.65        | 8.1          | 79           | 16.59        |
| 010       | 97.07        | 2.93         | 91.75        | 8.17         | 81.05        | 15.56        |
| 020       | 97.07        | 2.93         | 89.65        | 10.25        | 77.81        | 18.71        |
| 001       | 97.07        | 2.93         | 86.31        | 12.92        | 78.85        | 18           |
| 002       | 97.07        | 2.93         | 88.55        | 11.04        | 84.82        | 12.7         |
| 110       | 97.07        | 2.93         | 84.06        | 14.45        | 82.17        | 14.8         |
| 101       | 97.07        | 2.93         | 82.44        | 15.6         | 81.51        | 15.12        |
| 011       | 97.07        | 2.93         | 81.51        | 15.54        | 79.63        | 17.72        |
| 220       | 97.07        | 2.93         | 85.57        | 14.36        | 77.94        | 17.87        |
| 202       | 97.07        | 2.93         | 84.99        | 13.38        | 80.26        | 17.76        |
| 022       | 97.07        | 2.93         | 82.48        | 14.94        | 78.36        | 18.64        |
| 111       | 97.07        | 2.93         | 83.23        | 16.04        | 79.26        | 16.47        |
| 222       | 97.07        | 2.93         | 85.54        | 13.16        | 78.99        | 17.45        |
