# Supplementary material for: An In-Vitro Study of the Expansion and Transcriptomics of CD4+ and CD8+ Naïve and Memory T Cells Stimulated by IL-2, IL-7 and IL-15
Source: MDPI journal article supplement (doi:10.3390/cells11101701), 2022-05-20
Supplement: s1 [file s1]

## Principal Component Analysis of each T cell subset stimulated with each cytokine:

Genes with significant expression change in CD4 naive stimulated by IL2

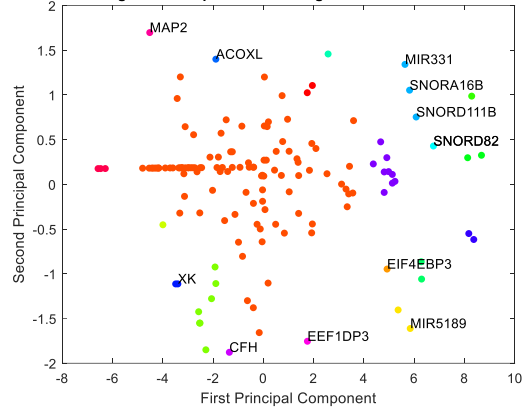

Genes with significant expression change in CD4 naive stimulated by IL7

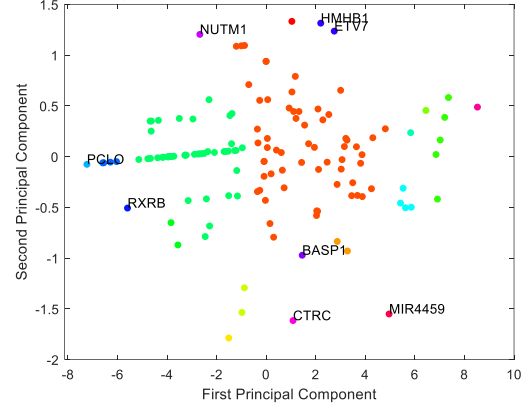

Genes with significant expression change in CD4 naive stimulated by IL15

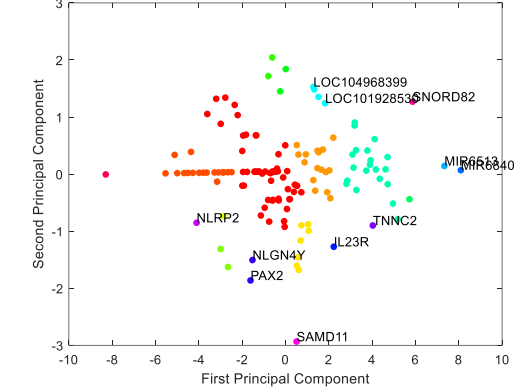

Genes with significant expression change in CD4 memory stimulated by IL2

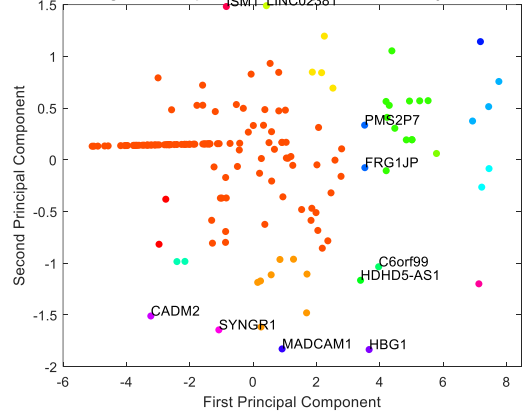

Genes with significant expression change in CD4 memory stimulated by IL7

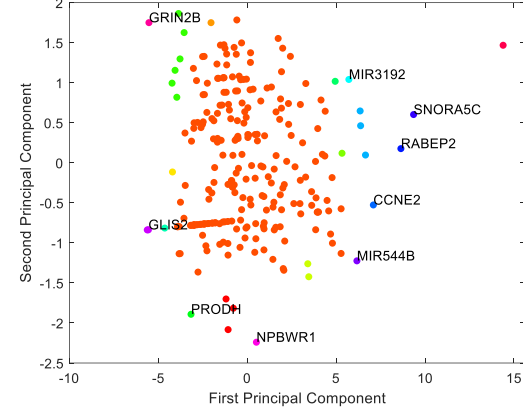

Genes with significant expression change in CD4 memory stimulated by IL15

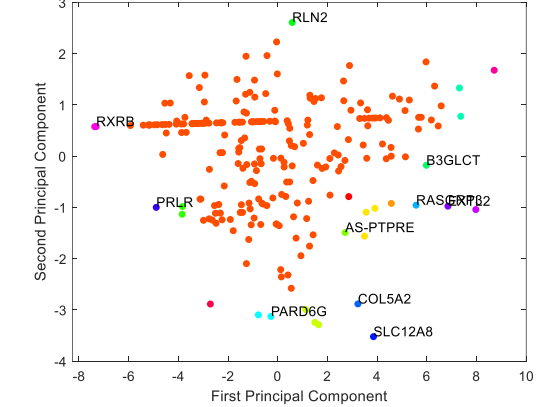

Genes with significant expression change in CD8 naive stimulated by IL2

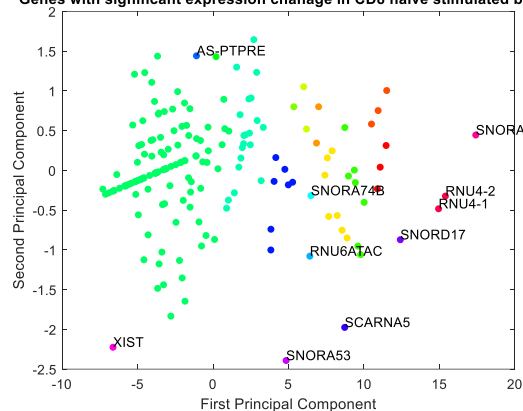

Genes with significant expression change in CD8 naive stimulated by IL7

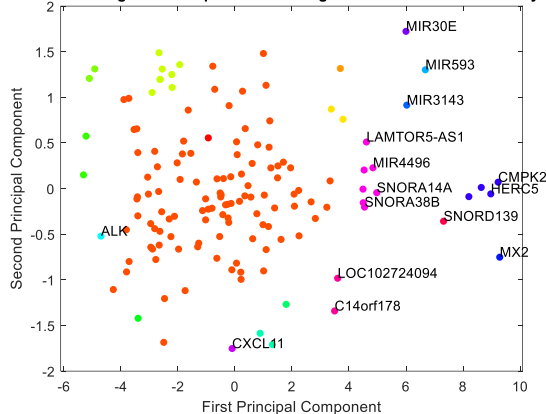

Genes with significant expression change in CD8 naive stimulated by IL15

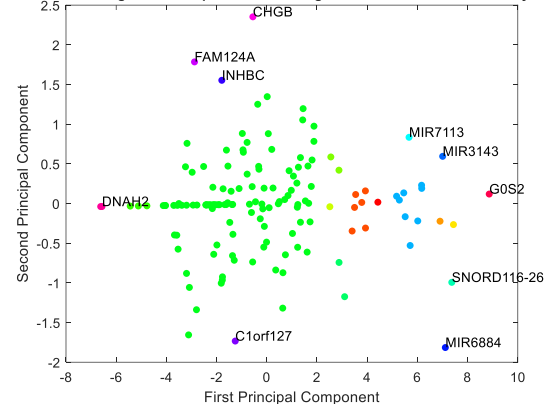

Genes with significant expression change in CD8 memory stimulated by IL2

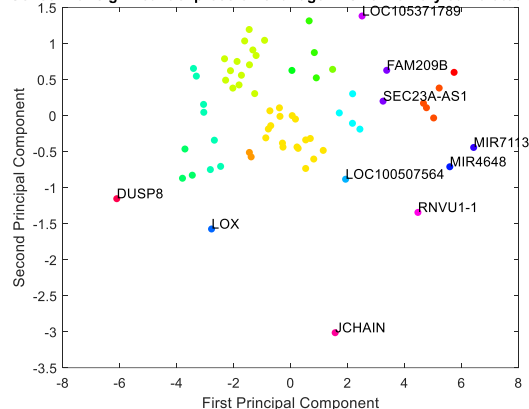

Genes with significant expression change in CD8 memory stimulated by IL7

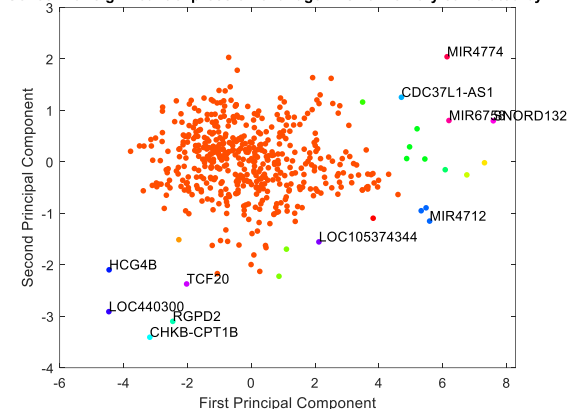

Genes with significant expression change in CD8 memory stimulated by IL15

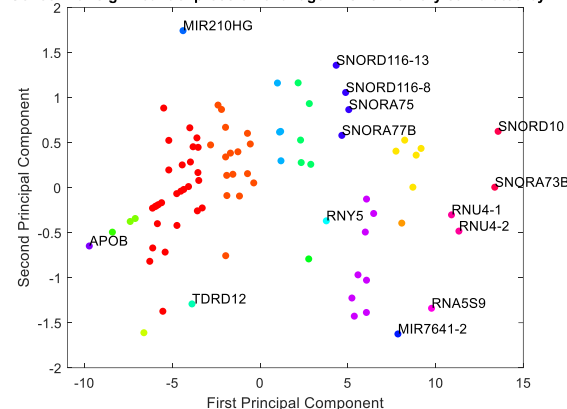

Supplemental Material S3 Figure: The colored points representing genes have been projected into a 2-dimensional space using principal component analysis. The color of the dots represents the distinct cluster of genes as represented by MATLAB. Genes which fall into specific clusters may bear significance to either shared function, co-localization, co-expression, antagonism, or some other type of relationship which links them together. In some of the plots, some clusters contain more genes than others. Again, this can be also because when observing the data through the planes of the first or second principal components, more of the variation may be

able to be explained by the first or second principal component, in which case a cluster may become more pronounced based on the plane drawn through the data. This also falls in line with the variation or lack thereof when concerning what genes fall into what clusters.
