# Supplementary material for: An In-Vitro Study of the Expansion and Transcriptomics of CD4+ and CD8+ Naïve and Memory T Cells Stimulated by IL-2, IL-7 and IL-15
Source: Cells. 2022 May 20;11(10):1701. doi: 10.3390/cells11101701 (PMC9139303; doi:10.3390/cells11101701)
Supplement: Supplementary file 1 [file cells-11-01701-s001.zip]

Archive with 9 entries (9 files):
- Supplementary Material S1_Fuzzy Models Supplemental Materials.pdf
- Supplementary Material S2_a_CD4_memory.xlsx
- Supplementary Material S2_b_CD4_naive.xlsx
- Supplementary Material S2_c_CD8_memory.xlsx
- Supplementary Material S2_d_CD8_naive.xlsx
- Supplementary Material S3_Principal Component Analysis of each T cell subset.pdf
- Supplementary Material S4_Shared genes up_down for all phenotypes.xlsx
- Supplementary Material S5_Functionality of naive T cells.pdf
- Supplementary Material S6_Figure Legend for the Metacore network.pdf
