# Supplementary material for: An In-Vitro Study of the Expansion and Transcriptomics of CD4+ and CD8+ Naïve and Memory T Cells Stimulated by IL-2, IL-7 and IL-15
Source: Cells. 2022 May 20;11(10):1701. doi: 10.3390/cells11101701 (PMC9139303; doi:10.3390/cells11101701)
Supplement: Supplementary file 1 [file cells-11-01701-s001.zip › Supplementary Material S2_a_CD4_memory.xlsx]

## Sheet: Gene_up_IL2
MITF	melanocyte inducing transcription factor
CAMTA1-DT	CAMTA1 divergent transcript
LOC101929536	uncharacterized LOC101929536
SNORA110	small nucleolar RNA, H/ACA box 110
HBG1	hemoglobin subunit gamma 1
RSPH9	radial spoke head component 9
LOC729970	hCG2028352-like
HIST2H2BC	NA
SNTG2	syntrophin gamma 2
TPI1P3	triosephosphate isomerase 1 pseudogene 3
BEND3P3	BEN domain containing 3 pseudogene 3
HLX-AS1	HLX antisense RNA 1
SLC22A18	solute carrier family 22 member 18
NEUROG2	neurogenin 2
MAOB	monoamine oxidase B
NUAK1	NUAK family kinase 1
SYNGR1	synaptogyrin 1
LOC441601	septin 7 pseudogene
LOC101928424	uncharacterized LOC101928424
ISM1	isthmin 1
PTPRN	protein tyrosine phosphatase receptor type N
CPEB1	cytoplasmic polyadenylation element binding protein 1
EHD4-AS1	EHD4 antisense RNA 1
HCAR2	hydroxycarboxylic acid receptor 2
SLC52A1	solute carrier family 52 member 1
COL4A5	collagen type IV alpha 5 chain
ANKRD26P1	ankyrin repeat domain 26 pseudogene 1
SNORD111B	small nucleolar RNA, C/D box 111B
LOC653653	adaptor related protein complex 1 sigma 2 subunit pseudogene
PLLP	plasmolipin
SLC17A1	solute carrier family 17 member 1
SNORD135	small nucleolar RNA, C/D box 135
PTOV1-AS1	PTOV1 antisense RNA 1
PKD2L1	polycystin 2 like 1, transient receptor potential cation channel
MIR3192	microRNA 3192
HDHD5-AS1	HDHD5 antisense RNA 1
CECR3	cat eye syndrome chromosome region, candidate 3
HOXA11-AS	HOXA11 antisense RNA
C6orf99	chromosome 6 open reading frame 99
F2RL3	F2R like thrombin or trypsin receptor 3
LINC02381	long intergenic non-protein coding RNA 2381
LRRC46	leucine rich repeat containing 46
CFAP57	cilia and flagella associated protein 57
LINC01948	long intergenic non-protein coding RNA 1948
LOC102724404	uncharacterized LOC102724404
EFR3B	EFR3 homolog B
CADM2	cell adhesion molecule 2
PMS2P7	PMS1 homolog 2, mismatch repair system component pseudogene 7
CCDC38	coiled-coil domain containing 38
LINC01144	long intergenic non-protein coding RNA 1144
MIR4665	microRNA 4665
MIR589	microRNA 589
FRG1JP	FSHD region gene 1 family member J, pseudogene
MADCAM1	mucosal vascular addressin cell adhesion molecule 1
ISPD	NA
ATAD3C	ATPase family AAA domain containing 3C

## Sheet: Gene_down_IL2
HTR6	5-hydroxytryptamine receptor 6
FBXW10	F-box and WD repeat domain containing 10
TMEM272	transmembrane protein 272
DDAH1	dimethylarginine dimethylaminohydrolase 1
WDR64	WD repeat domain 64
UNC45B	unc-45 myosin chaperone B
P2RY2	purinergic receptor P2Y2
OIT3	oncoprotein induced transcript 3
ARHGAP6	Rho GTPase activating protein 6
SNORD81	small nucleolar RNA, C/D box 81
FXYD6	FXYD domain containing ion transport regulator 6
DSC2	desmocollin 2
CELF2-AS1	CELF2 antisense RNA 1
COLCA1	colorectal cancer associated 1
INTU	inturned planar cell polarity protein
DPY19L1P1	DPY19L1 pseudogene 1
ANKHD1	ankyrin repeat and KH domain containing 1
LOC100506258	uncharacterized LOC100506258
FNDC1	fibronectin type III domain containing 1
MIR3161	microRNA 3161
CCDC149	coiled-coil domain containing 149
ABCC9	ATP binding cassette subfamily C member 9
ADGRG2	adhesion G protein-coupled receptor G2
CRB1	crumbs cell polarity complex component 1
FDPSP2	farnesyl diphosphate synthase pseudogene 2
LOC105369595	uncharacterized LOC105369595
NGEF	neuronal guanine nucleotide exchange factor
MIR7851	microRNA 7851
GPX3	glutathione peroxidase 3
SHANK2	SH3 and multiple ankyrin repeat domains 2
POC1B-GALNT4	POC1B-GALNT4 readthrough
MIR3922	microRNA 3922
DISP1	dispatched RND transporter family member 1
LOC101593348	uncharacterized LOC101593348
LOC101928697	uncharacterized LOC101928697
LOC101929718	uncharacterized LOC101929718
BOLA2-SMG1P6	BOLA2-SMG1P6 readthrough
EPX	eosinophil peroxidase
SCNN1B	sodium channel epithelial 1 beta subunit
TMPRSS4	transmembrane serine protease 4
PPP1R9A	protein phosphatase 1 regulatory subunit 9A
MYCN	MYCN proto-oncogene, bHLH transcription factor
INHBC	inhibin subunit beta C
DQX1	DEAQ-box RNA dependent ATPase 1
NT5DC4	5'-nucleotidase domain containing 4
LOC101927166	uncharacterized LOC101927166
NEBL	nebulette
LINC01136	long intergenic non-protein coding RNA 1136
SHOX2	short stature homeobox 2
BACE2	beta-secretase 2
SPACA6P-AS	SPACA6P antisense RNA
MEIKIN	meiotic kinetochore factor
MIR106B	microRNA 106b
CD1C	CD1c molecule
CFAP74	cilia and flagella associated protein 74
PCDHGA6	protocadherin gamma subfamily A, 6
COL8A2	collagen type VIII alpha 2 chain
RASGEF1C	RasGEF domain family member 1C
MIR1254-1	NA
CA3	carbonic anhydrase 3
ZNF337-AS1	ZNF337 antisense RNA 1
FRG1EP	FSHD region gene 1 family member E, pseudogene
LINC00659	long intergenic non-protein coding RNA 659
C21orf91-OT1	C21orf91 overlapping transcript 1
LINC01684	long intergenic non-protein coding RNA 1684
LOC150051	uncharacterized LOC150051
LOC105372795	uncharacterized LOC105372795
GBA	glucosylceramidase beta
HOXA1	homeobox A1
MIR374B	microRNA 374b
MGP	matrix Gla protein
NEK5	NIMA related kinase 5
SLC22A15	solute carrier family 22 member 15
RPL34-AS1	RPL34 antisense RNA 1 (head to head)
MIR571	microRNA 571
OXTR	oxytocin receptor
SEPSECS-AS1	SEPSECS antisense RNA 1 (head to head)
PTTG2	pituitary tumor-transforming 2
GAS6-AS1	GAS6 antisense RNA 1
CASC11	cancer susceptibility 11
MIR5687	microRNA 5687
LINC01277	long intergenic non-protein coding RNA 1277
AURKAPS1	NA
44256	NA
CORT	cortistatin
RNASE2	ribonuclease A family member 2
FSCN3	fascin actin-bundling protein 3
LOC101929066	uncharacterized LOC101929066
PURPL	p53 upregulated regulator of p53 levels
LOC100288181	NA
FAM27C	family with sequence similarity 27 member C
LOC100507346	uncharacterized LOC100507346
CHST3	carbohydrate sulfotransferase 3
TMEM145	transmembrane protein 145
LHFPL1	LHFPL tetraspan subfamily member 1
SPATA32	spermatogenesis associated 32
CR1L	complement C3b/C4b receptor 1 like
C11orf94	chromosome 11 open reading frame 94
ARL9	ADP ribosylation factor like GTPase 9
ERVFRD-1	endogenous retrovirus group FRD member 1, envelope
RBM15-AS1	RBM15 antisense RNA 1

## Sheet: Gene_insig_IL2
NSMF	NMDA receptor synaptonuclear signaling and neuronal migration factor
LOC729737	uncharacterized LOC729737
LOC100133331	uncharacterized LOC100133331
LOC100288069	uncharacterized LOC100288069
FAM87B	family with sequence similarity 87 member B
LINC00115	long intergenic non-protein coding RNA 115
NR1I2	nuclear receptor subfamily 1 group I member 2
TNFSF11	TNF superfamily member 11
CEP19	centrosomal protein 19
NLRP1	NLR family pyrin domain containing 1
LOC100130417	NA
AGL	amylo-alpha-1, 6-glucosidase, 4-alpha-glucanotransferase
NES	nestin
HSPA8	heat shock protein family A (Hsp70) member 8
SOX21	SRY-box transcription factor 21
MMP23B	matrix metallopeptidase 23B
NUDT6	nudix hydrolase 6
SNW1	SNW domain containing 1
FAF1	Fas associated factor 1
C1orf159	chromosome 1 open reading frame 159
ZCCHC4	zinc finger CCHC-type containing 4
TREM1	triggering receptor expressed on myeloid cells 1
PCBP4	poly(rC) binding protein 4
PPP2R2C	protein phosphatase 2 regulatory subunit Bgamma
CHMP1B	charged multivesicular body protein 1B
ATP13A1	ATPase 13A1
MRPL47	mitochondrial ribosomal protein L47
TPD52	tumor protein D52
MEOX1	mesenchyme homeobox 1
GJC2	gap junction protein gamma 2
JPH2	junctophilin 2
PHTF2	putative homeodomain transcription factor 2
CCDC28B	coiled-coil domain containing 28B
SNORD167	small nucleolar RNA, C/D box 167
ACHE	acetylcholinesterase (Cartwright blood group)
PUSL1	pseudouridine synthase like 1
CLASP1	cytoplasmic linker associated protein 1
NIPA1	NIPA magnesium transporter 1
NFATC4	nuclear factor of activated T cells 4
ASAH2	N-acylsphingosine amidohydrolase 2
RAN	RAN, member RAS oncogene family
S1PR4	sphingosine-1-phosphate receptor 4
AK7	adenylate kinase 7
LSS	lanosterol synthase
NIPAL3	NIPA like domain containing 3
CCNL2	cyclin L2
SLC35D2	solute carrier family 35 member D2
PPIE	peptidylprolyl isomerase E
CLEC12B	C-type lectin domain family 12 member B
ZC3H11A	zinc finger CCCH-type containing 11A
LOC148413	NA
CPSF2	cleavage and polyadenylation specific factor 2
LINC01770	long intergenic non-protein coding RNA 1770
PCBP3	poly(rC) binding protein 3
ADD2	adducin 2
CELF2	CUGBP Elav-like family member 2
TIAL1	TIA1 cytotoxic granule associated RNA binding protein like 1
ZNF248	zinc finger protein 248
NRXN1	neurexin 1
NTPCR	nucleoside-triphosphatase, cancer-related
TTYH2	tweety family member 2
PACSIN2	protein kinase C and casein kinase substrate in neurons 2
NEIL1	nei like DNA glycosylase 1
RCBTB1	RCC1 and BTB domain containing protein 1
CELF4	CUGBP Elav-like family member 4
TGDS	TDP-glucose 4,6-dehydratase
WDR20	WD repeat domain 20
LCMT2	leucine carboxyl methyltransferase 2
C2CD5	C2 calcium dependent domain containing 5
PCNX2	pecanex 2
JAKMIP2	janus kinase and microtubule interacting protein 2
ZNF623	zinc finger protein 623
ELMO1	engulfment and cell motility 1
DNAJC1	DnaJ heat shock protein family (Hsp40) member C1
TESPA1	thymocyte expressed, positive selection associated 1
RUSC2	RUN and SH3 domain containing 2
EPM2AIP1	EPM2A interacting protein 1
CDK11A	cyclin dependent kinase 11A
AP3D1	adaptor related protein complex 3 subunit delta 1
SP110	SP110 nuclear body protein
HNRNPAB	heterogeneous nuclear ribonucleoprotein A/B
IDI1	isopentenyl-diphosphate delta isomerase 1
HUS1	HUS1 checkpoint clamp component
FOXA3	forkhead box A3
HSF2	heat shock transcription factor 2
AMPD2	adenosine monophosphate deaminase 2
USP6	ubiquitin specific peptidase 6
AGFG1	ArfGAP with FG repeats 1
MED27	mediator complex subunit 27
UXS1	UDP-glucuronate decarboxylase 1
YME1L1	YME1 like 1 ATPase
MND1	meiotic nuclear divisions 1
ERLIN1	ER lipid raft associated 1
SH2D3C	SH2 domain containing 3C
NBL1	NBL1, DAN family BMP antagonist
AP4B1	adaptor related protein complex 4 subunit beta 1
ZNF821	zinc finger protein 821
PRKCZ-AS1	PRKCZ antisense RNA 1
MORF4L2	mortality factor 4 like 2
SHMT1	serine hydroxymethyltransferase 1
FAAP20	FA core complex associated protein 20
PEX5L	peroxisomal biogenesis factor 5 like
LOC100129534	small nuclear ribonucleoprotein polypeptide N pseudogene
MORN1	MORN repeat containing 1
INSC	INSC spindle orientation adaptor protein
AEBP1	AE binding protein 1
TNF	tumor necrosis factor
PLEK	pleckstrin
MAL	mal, T cell differentiation protein
ADSS	NA
DTYMK	deoxythymidylate kinase
CLCN4	chloride voltage-gated channel 4
GTDC1	glycosyltransferase like domain containing 1
URI1	URI1 prefoldin like chaperone
SLC13A2	solute carrier family 13 member 2
ST18	ST18 C2H2C-type zinc finger transcription factor
TBC1D2B	TBC1 domain family member 2B
NPDC1	neural proliferation, differentiation and control 1
ANAPC13	anaphase promoting complex subunit 13
YIPF3	Yip1 domain family member 3
DYNC1LI2	dynein cytoplasmic 1 light intermediate chain 2
C9orf64	chromosome 9 open reading frame 64
MPZL3	myelin protein zero like 3
BPNT1	3'(2'), 5'-bisphosphate nucleotidase 1
DUSP8	dual specificity phosphatase 8
DUSP2	dual specificity phosphatase 2
BANK1	B cell scaffold protein with ankyrin repeats 1
LRP10	LDL receptor related protein 10
TRDMT1	tRNA aspartic acid methyltransferase 1
DYNC1I1	dynein cytoplasmic 1 intermediate chain 1
DDX11	DEAD/H-box helicase 11
ARHGEF7	Rho guanine nucleotide exchange factor 7
DDX10	DEAD-box helicase 10
IGSF11	immunoglobulin superfamily member 11
DGCR5	DiGeorge syndrome critical region gene 5
RN7SL1	RNA component of signal recognition particle 7SL1
FAM49B	family with sequence similarity 49 member B
DNAJC10	DnaJ heat shock protein family (Hsp40) member C10
NETO1	neuropilin and tolloid like 1
KDM4C	lysine demethylase 4C
ADAM28	ADAM metallopeptidase domain 28
PCYT1B	phosphate cytidylyltransferase 1, choline, beta
EGFL7	EGF like domain multiple 7
ERI1	exoribonuclease 1
DYNC1I2	dynein cytoplasmic 1 intermediate chain 2
NMI	N-myc and STAT interactor
MTMR4	myotubularin related protein 4
ARSG	arylsulfatase G
HTR7	5-hydroxytryptamine receptor 7
LOC102724450	uncharacterized LOC102724450
PTK2	protein tyrosine kinase 2
PLBD2	phospholipase B domain containing 2
FUT11	fucosyltransferase 11
ZNF596	zinc finger protein 596
GTF2IRD2	GTF2I repeat domain containing 2
CLEC4F	C-type lectin domain family 4 member F
C18orf54	chromosome 18 open reading frame 54
SPIB	Spi-B transcription factor
RFXANK	regulatory factor X associated ankyrin containing protein
CDK13	cyclin dependent kinase 13
SLC1A5	solute carrier family 1 member 5
CCSER1	coiled-coil serine rich protein 1
USP27X	ubiquitin specific peptidase 27 X-linked
SNX20	sorting nexin 20
SF3A3	splicing factor 3a subunit 3
WDR54	WD repeat domain 54
OGFOD1	2-oxoglutarate and iron dependent oxygenase domain containing 1
MAGED1	MAGE family member D1
CAND2	cullin associated and neddylation dissociated 2 (putative)
KDM2A	lysine demethylase 2A
RABL2B	RAB, member of RAS oncogene family like 2B
NR4A3	nuclear receptor subfamily 4 group A member 3
AP4S1	adaptor related protein complex 4 subunit sigma 1
WDR45	WD repeat domain 45
CORO1A	coronin 1A
HHLA2	HERV-H LTR-associating 2
MCRIP2	MAPK regulated corepressor interacting protein 2
SNORC	secondary ossification center associated regulator of chondrocyte maturation
CMC1	C-X9-C motif containing 1
MAPK8	mitogen-activated protein kinase 8
EPB41L5	erythrocyte membrane protein band 4.1 like 5
C15orf54	chromosome 15 open reading frame 54 (putative)
TIMELESS	timeless circadian regulator
LAIR1	leukocyte associated immunoglobulin like receptor 1
BLACAT1	bladder cancer associated transcript 1
HDAC9	histone deacetylase 9
SPHK2	sphingosine kinase 2
DDR1	discoidin domain receptor tyrosine kinase 1
DOCK8	dedicator of cytokinesis 8
SENP1	SUMO specific peptidase 1
TRIM69	tripartite motif containing 69
STX18	syntaxin 18
ITSN1	intersectin 1
VAX1	ventral anterior homeobox 1
GNE	glucosamine (UDP-N-acetyl)-2-epimerase/N-acetylmannosamine kinase
HCCS	holocytochrome c synthase
SPRED2	sprouty related EVH1 domain containing 2
NDRG2	NDRG family member 2
LOC102724552	NA
SNORD128	small nucleolar RNA, C/D box 128
ABRAXAS1	abraxas 1, BRCA1 A complex subunit
MAPK9	mitogen-activated protein kinase 9
ARID5A	AT-rich interaction domain 5A
MIR6728	microRNA 6728
ENO1-AS1	ENO1 antisense RNA 1
ZNF438	zinc finger protein 438
CACFD1	calcium channel flower domain containing 1
NAP1L4	nucleosome assembly protein 1 like 4
TLR6	toll like receptor 6
AKR1A1	aldo-keto reductase family 1 member A1
ST8SIA5	ST8 alpha-N-acetyl-neuraminide alpha-2,8-sialyltransferase 5
LSR	lipolysis stimulated lipoprotein receptor
ATL1	atlastin GTPase 1
ABHD17B	abhydrolase domain containing 17B
MIR34AHG	MIR34A host gene
LINC01759	NA
EPB41L1	erythrocyte membrane protein band 4.1 like 1
LOC100506022	NA
SCYL2	SCY1 like pseudokinase 2
GOSR2	golgi SNAP receptor complex member 2
PIK3CD-AS1	PIK3CD antisense RNA 1
PIK3CD-AS2	PIK3CD antisense RNA 2
TRAF1	TNF receptor associated factor 1
FAM193B	family with sequence similarity 193 member B
MIA2	MIA SH3 domain ER export factor 2
BCL2L11	BCL2 like 11
ZNF559	zinc finger protein 559
CCNI2	cyclin I family member 2
FGD4	FYVE, RhoGEF and PH domain containing 4
GLYR1	glyoxylate reductase 1 homolog
JAK2	Janus kinase 2
SAP130	Sin3A associated protein 130
RIPPLY3	ripply transcriptional repressor 3
AURKAIP1	aurora kinase A interacting protein 1
CD59	CD59 molecule (CD59 blood group)
LRRC31	leucine rich repeat containing 31
KCNJ15	potassium inwardly rectifying channel subfamily J member 15
GAB2	GRB2 associated binding protein 2
ACTL6A	actin like 6A
SNX24	sorting nexin 24
IL15	interleukin 15
SLC34A1	solute carrier family 34 member 1
CDON	cell adhesion associated, oncogene regulated
CENPS	centromere protein S
CCDC103	coiled-coil domain containing 103
CTNNA3	catenin alpha 3
PPP1R15A	protein phosphatase 1 regulatory subunit 15A
EDC4	enhancer of mRNA decapping 4
RUSC1	RUN and SH3 domain containing 1
BRD7	bromodomain containing 7
HSD11B1L	hydroxysteroid 11-beta dehydrogenase 1 like
USH2A	usherin
LOC105376736	NA
PCMTD1	protein-L-isoaspartate (D-aspartate) O-methyltransferase domain containing 1
TMEM218	transmembrane protein 218
TRAPPC3	trafficking protein particle complex 3
TFPI2	tissue factor pathway inhibitor 2
SLC25A10	solute carrier family 25 member 10
MTOR-AS1	MTOR antisense RNA 1
ALDH1A1	aldehyde dehydrogenase 1 family member A1
CHD1L	chromodomain helicase DNA binding protein 1 like
BAG3	BCL2 associated athanogene 3
SLC25A27	solute carrier family 25 member 27
UCA1	urothelial cancer associated 1
MSTO2P	misato family member 2, pseudogene
EML2	EMAP like 2
SCN1A	sodium voltage-gated channel alpha subunit 1
SERPINB8	serpin family B member 8
NPPA-AS1	NPPA antisense RNA 1
CEP70	centrosomal protein 70
WTAP	WT1 associated protein
USP19	ubiquitin specific peptidase 19
GCDH	glutaryl-CoA dehydrogenase
ELP2	elongator acetyltransferase complex subunit 2
UBE2F	ubiquitin conjugating enzyme E2 F (putative)
GAPVD1	GTPase activating protein and VPS9 domains 1
PSMD1	proteasome 26S subunit, non-ATPase 1
HDAC7	histone deacetylase 7
BEST1	bestrophin 1
UXT	ubiquitously expressed prefoldin like chaperone
UCHL1	ubiquitin C-terminal hydrolase L1
PLSCR4	phospholipid scramblase 4
MIR6730	microRNA 6730
PCID2	PCI domain containing 2
RUVBL1	RuvB like AAA ATPase 1
DUSP23	dual specificity phosphatase 23
TTC13	tetratricopeptide repeat domain 13
LRRN3	leucine rich repeat neuronal 3
MLF1	myeloid leukemia factor 1
PRRC2A	proline rich coiled-coil 2A
APBA2	amyloid beta precursor protein binding family A member 2
CFAP97D1	CFAP97 domain containing 1
UBE2H	ubiquitin conjugating enzyme E2 H
TMEM51	transmembrane protein 51
LENG9	leukocyte receptor cluster member 9
LRRFIP2	LRR binding FLII interacting protein 2
IFNAR2	interferon alpha and beta receptor subunit 2
SFXN5	sideroflexin 5
NAF1	nuclear assembly factor 1 ribonucleoprotein
TEX261	testis expressed 261
L3HYPDH	trans-L-3-hydroxyproline dehydratase
GLMP	glycosylated lysosomal membrane protein
DNAJC16	DnaJ heat shock protein family (Hsp40) member C16
44441	NA
EED	embryonic ectoderm development
PRKN	parkin RBR E3 ubiquitin protein ligase
ENOX2	ecto-NOX disulfide-thiol exchanger 2
STK25	serine/threonine kinase 25
VAT1	vesicle amine transport 1
SYNCRIP	synaptotagmin binding cytoplasmic RNA interacting protein
FLJ37453	uncharacterized LOC729614
AP2M1	adaptor related protein complex 2 subunit mu 1
FBRSL1	fibrosin like 1
KCP	kielin cysteine rich BMP regulator
FLNB	filamin B
TFDP2	transcription factor Dp-2
RAD17	RAD17 checkpoint clamp loader component
TESK1	testis associated actin remodelling kinase 1
MYO18B	myosin XVIIIB
GRB10	growth factor receptor bound protein 10
DDX59	DEAD-box helicase 59
FBXW7	F-box and WD repeat domain containing 7
ARL3	ADP ribosylation factor like GTPase 3
TNFSF14	TNF superfamily member 14
ABCB7	ATP binding cassette subfamily B member 7
RIPK1	receptor interacting serine/threonine kinase 1
PIGA	phosphatidylinositol glycan anchor biosynthesis class A
YIF1A	Yip1 interacting factor homolog A, membrane trafficking protein
ABO	ABO, alpha 1-3-N-acetylgalactosaminyltransferase and alpha 1-3-galactosyltransferase
WDR4	WD repeat domain 4
NLRP4	NLR family pyrin domain containing 4
CD99L2	CD99 molecule like 2
PPFIBP1	PPFIA binding protein 1
TMEM209	transmembrane protein 209
KLHDC10	kelch domain containing 10
LINC01783	long intergenic non-protein coding RNA 1783
PROM2	prominin 2
CCDC181	coiled-coil domain containing 181
PPP3CB	protein phosphatase 3 catalytic subunit beta
CROCCP2	CROCC pseudogene 2
MST1P2	macrophage stimulating 1 pseudogene 2
ESPNP	espin pseudogene
PKIG	cAMP-dependent protein kinase inhibitor gamma
WDR6	WD repeat domain 6
OSBPL1A	oxysterol binding protein like 1A
LOC105376805	uncharacterized LOC105376805
SBNO2	strawberry notch homolog 2
EBP	EBP cholestenol delta-isomerase
ZNF22	zinc finger protein 22
ZNF182	zinc finger protein 182
KHDRBS3	KH RNA binding domain containing, signal transduction associated 3
DMRT2	doublesex and mab-3 related transcription factor 2
ZNF19	zinc finger protein 19
ZNF17	zinc finger protein 17
KPTN	kaptin, actin binding protein
CAPN11	calpain 11
ZWINT	ZW10 interacting kinetochore protein
KIF2C	kinesin family member 2C
PPARGC1A	PPARG coactivator 1 alpha
TP53I11	tumor protein p53 inducible protein 11
INVS	inversin
ELP1	elongator complex protein 1
LRRC63	leucine rich repeat containing 63
TFG	trafficking from ER to golgi regulator
OPRM1	opioid receptor mu 1
LINC01521	long intergenic non-protein coding RNA 1521
BICD1	BICD cargo adaptor 1
P2RX4	purinergic receptor P2X 4
UBL7-AS1	UBL7 antisense RNA 1 (head to head)
DLGAP1-AS2	DLGAP1 antisense RNA 2
FER1L4	fer-1 like family member 4 (pseudogene)
FUT8	fucosyltransferase 8
APOE	apolipoprotein E
SPATA31C2	SPATA31 subfamily C member 2
RASGRP3	RAS guanyl releasing protein 3
ATP5MC2	ATP synthase membrane subunit c locus 2
ZNF565	zinc finger protein 565
UBAC1	UBA domain containing 1
C20orf194	chromosome 20 open reading frame 194
NOX5	NADPH oxidase 5
ING4	inhibitor of growth family member 4
THAP11	THAP domain containing 11
SPRYD7	SPRY domain containing 7
ADGRG6	adhesion G protein-coupled receptor G6
ATP10D	ATPase phospholipid transporting 10D (putative)
LOC101927895	NA
SEC14L1	SEC14 like lipid binding 1
BSDC1	BSD domain containing 1
AGAP5	ArfGAP with GTPase domain, ankyrin repeat and PH domain 5
ODC1	ornithine decarboxylase 1
AKR7L	aldo-keto reductase family 7 like (gene/pseudogene)
RXRG	retinoid X receptor gamma
LOC100506730	uncharacterized LOC100506730
CAPG	capping actin protein, gelsolin like
MYO1A	myosin IA
CACNA1F	calcium voltage-gated channel subunit alpha1 F
ZNF140	zinc finger protein 140
PQLC2	NA
NLRP2	NLR family pyrin domain containing 2
CXorf40A	chromosome X open reading frame 40A
NCOA4	nuclear receptor coactivator 4
NUDT16	nudix hydrolase 16
ABCG2	ATP binding cassette subfamily G member 2 (Junior blood group)
LOC105378614	uncharacterized LOC105378614
PPP1R18	protein phosphatase 1 regulatory subunit 18
MINOS1	NA
POLR2C	RNA polymerase II subunit C
M1AP	meiosis 1 associated protein
ZFAND2B	zinc finger AN1-type containing 2B
LEO1	LEO1 homolog, Paf1/RNA polymerase II complex component
GALM	galactose mutarotase
PIH1D2	PIH1 domain containing 2
TRIM43	tripartite motif containing 43
TMEM45B	transmembrane protein 45B
LDHAL6A	lactate dehydrogenase A like 6A
NRDC	nardilysin convertase
KLF8	Kruppel like factor 8
FHL1	four and a half LIM domains 1
MAP7	microtubule associated protein 7
PDE4DIP	phosphodiesterase 4D interacting protein
MAGI3	membrane associated guanylate kinase, WW and PDZ domain containing 3
PTK7	protein tyrosine kinase 7 (inactive)
C4orf33	chromosome 4 open reading frame 33
TSHZ2	teashirt zinc finger homeobox 2
PINK1-AS	PINK1 antisense RNA
CENPX	centromere protein X
CDC27	cell division cycle 27
CEP97	centrosomal protein 97
C8orf59	NA
DARS	NA
CHN2	chimerin 2
TMEM14B	transmembrane protein 14B
CACNA1C	calcium voltage-gated channel subunit alpha1 C
PDCD2	programmed cell death 2
BRD2	bromodomain containing 2
LOC100506801	NA
UBAC2	UBA domain containing 2
GSKIP	GSK3B interacting protein
TCF12	transcription factor 12
CLPTM1L	CLPTM1 like
GHDC	GH3 domain containing
PLPP5	phospholipid phosphatase 5
NRBF2	nuclear receptor binding factor 2
S1PR5	sphingosine-1-phosphate receptor 5
TCF7L2	transcription factor 7 like 2
MRPL36	mitochondrial ribosomal protein L36
MRPL38	mitochondrial ribosomal protein L38
MRPL41	mitochondrial ribosomal protein L41
MRPS6	mitochondrial ribosomal protein S6
PKIB	cAMP-dependent protein kinase inhibitor beta
ASPH	aspartate beta-hydroxylase
PRKCQ	protein kinase C theta
GOLGA6L3	golgin A6 family like 3
NPIPB4	nuclear pore complex interacting protein family member B4
KIFC3	kinesin family member C3
BEND6	BEN domain containing 6
MON2	MON2 homolog, regulator of endosome-to-Golgi trafficking
R3HDM2	R3H domain containing 2
MYT1L	myelin transcription factor 1 like
DAPK2	death associated protein kinase 2
XPO7	exportin 7
TGIF1	TGFB induced factor homeobox 1
C9orf43	chromosome 9 open reading frame 43
CRNKL1	crooked neck pre-mRNA splicing factor 1
LINC01635	long intergenic non-protein coding RNA 1635
FUOM	fucose mutarotase
IL16	interleukin 16
PRR18	proline rich 18
CARHSP1	calcium regulated heat stable protein 1
ASNS	asparagine synthetase (glutamine-hydrolyzing)
IL1RL1	interleukin 1 receptor like 1
IL18R1	interleukin 18 receptor 1
RBL2	RB transcriptional corepressor like 2
MAPT	microtubule associated protein tau
RNASEH1	ribonuclease H1
CTSH	cathepsin H
ADSL	adenylosuccinate lyase
NFIL3	nuclear factor, interleukin 3 regulated
NDUFV1	NADH:ubiquinone oxidoreductase core subunit V1
MPDZ	multiple PDZ domain crumbs cell polarity complex component
CADM1	cell adhesion molecule 1
ANKRD2	ankyrin repeat domain 2
UNKL	unk like zinc finger
OGDHL	oxoglutarate dehydrogenase like
LINC01355	long intergenic non-protein coding RNA 1355
TP73	tumor protein p73
TMBIM6	transmembrane BAX inhibitor motif containing 6
MYB	MYB proto-oncogene, transcription factor
CXCR2	C-X-C motif chemokine receptor 2
SCG3	secretogranin III
CREM	cAMP responsive element modulator
PLA2G6	phospholipase A2 group VI
ZNF436-AS1	ZNF436 antisense RNA 1
INPP5J	inositol polyphosphate-5-phosphatase J
HACE1	HECT domain and ankyrin repeat containing E3 ubiquitin protein ligase 1
TOB1	transducer of ERBB2, 1
TRA2B	transformer 2 beta homolog
KIAA0586	KIAA0586
ELOA-AS1	ELOA antisense RNA 1
ETV2	ETS variant transcription factor 2
FAM98A	family with sequence similarity 98 member A
EPHA4	EPH receptor A4
RABL2A	RAB, member of RAS oncogene family like 2A
SMUG1	single-strand-selective monofunctional uracil-DNA glycosylase 1
CAMK2D	calcium/calmodulin dependent protein kinase II delta
KRBOX4	KRAB box domain containing 4
CCRL2	C-C motif chemokine receptor like 2
SYCE1	synaptonemal complex central element protein 1
SYNRG	synergin gamma
CHRDL2	chordin like 2
RIMS2	regulating synaptic membrane exocytosis 2
PIGX	phosphatidylinositol glycan anchor biosynthesis class X
C1orf56	chromosome 1 open reading frame 56
TIPIN	TIMELESS interacting protein
SSH3	slingshot protein phosphatase 3
GEMIN8	gem nuclear organelle associated protein 8
TMEM160	transmembrane protein 160
BTG3	BTG anti-proliferation factor 3
EHD1	EH domain containing 1
HNRNPA0	heterogeneous nuclear ribonucleoprotein A0
GPR75	G protein-coupled receptor 75
TADA3	transcriptional adaptor 3
AP3M2	adaptor related protein complex 3 subunit mu 2
RIBC2	RIB43A domain with coiled-coils 2
KDELR1	KDEL endoplasmic reticulum protein retention receptor 1
MORF4L1	mortality factor 4 like 1
SENP6	SUMO specific peptidase 6
HERC4	HECT and RLD domain containing E3 ubiquitin protein ligase 4
SNAP29	synaptosome associated protein 29
TCEAL1	transcription elongation factor A like 1
CNOT8	CCR4-NOT transcription complex subunit 8
CEBPA	CCAAT enhancer binding protein alpha
CEACAM5	CEA cell adhesion molecule 5
B4GALT6	beta-1,4-galactosyltransferase 6
RUNX3	RUNX family transcription factor 3
CASP3	caspase 3
CNKSR1	connector enhancer of kinase suppressor of Ras 1
RCAN3AS	RCAN3 antisense RNA
TBX20	T-box transcription factor 20
NEK6	NIMA related kinase 6
ANKMY1	ankyrin repeat and MYND domain containing 1
ABHD10	abhydrolase domain containing 10
SLC35C2	solute carrier family 35 member C2
NRF1	nuclear respiratory factor 1
MIR6731	microRNA 6731
MIR4425	microRNA 4425
PLIN1	perilipin 1
POLR2I	RNA polymerase II subunit I
RSRP1	arginine and serine rich protein 1
C3orf52	chromosome 3 open reading frame 52
TBC1D15	TBC1 domain family member 15
PODNL1	podocan like 1
TSC1	TSC complex subunit 1
CYSLTR1	cysteinyl leukotriene receptor 1
PDXDC1	pyridoxal dependent decarboxylase domain containing 1
ABLIM1	actin binding LIM protein 1
VPS50	VPS50 subunit of EARP/GARPII complex
MRPL52	mitochondrial ribosomal protein L52
IL21R	interleukin 21 receptor
LOC646471	uncharacterized LOC646471
FN1	fibronectin 1
AIMP1	aminoacyl tRNA synthetase complex interacting multifunctional protein 1
MRVI1	murine retrovirus integration site 1 homolog
TARS2	threonyl-tRNA synthetase 2, mitochondrial
SLFN5	schlafen family member 5
KRT10	keratin 10
ITGA2B	integrin subunit alpha 2b
LOC101928303	NA
NUP210L	nucleoporin 210 like
MBNL1	muscleblind like splicing regulator 1
KIF5C	kinesin family member 5C
STOX1	storkhead box 1
TBC1D17	TBC1 domain family member 17
DYNC2H1	dynein cytoplasmic 2 heavy chain 1
NFATC1	nuclear factor of activated T cells 1
LOC101928324	NA
SEMA4F	ssemaphorin 4F
ZNF138	zinc finger protein 138
AZI2	5-azacytidine induced 2
THADA	THADA armadillo repeat containing
LOC101928728	uncharacterized LOC101928728
KLK10	kallikrein related peptidase 10
C2orf81	chromosome 2 open reading frame 81
PHYH	phytanoyl-CoA 2-hydroxylase
AFAP1L2	actin filament associated protein 1 like 2
DCLRE1C	DNA cross-link repair 1C
ROBO3	roundabout guidance receptor 3
DTNB	dystrobrevin beta
MAP3K9	mitogen-activated protein kinase kinase kinase 9
CALD1	caldesmon 1
ACTG1P20	actin gamma 1 pseudogene 20
TOM1	target of myb1 membrane trafficking protein
AGBL3	ATP/GTP binding protein like 3
WDR27	WD repeat domain 27
BIRC5	baculoviral IAP repeat containing 5
RGS14	regulator of G protein signaling 14
GAS2L1	growth arrest specific 2 like 1
RASL10A	RAS like family 10 member A
RBM12	RNA binding motif protein 12
MT1A	metallothionein 1A
CD200	CD200 molecule
HDAC6	histone deacetylase 6
TAF6L	TATA-box binding protein associated factor 6 like
MYL12A	myosin light chain 12A
IVNS1ABP	influenza virus NS1A binding protein
POLR3C	RNA polymerase III subunit C
POLR3F	RNA polymerase III subunit F
ARID3B	AT-rich interaction domain 3B
GRAMD4	GRAM domain containing 4
FRMD4B	FERM domain containing 4B
SCARNA1	small Cajal body-specific RNA 1
MMP2	matrix metallopeptidase 2
C15orf40	chromosome 15 open reading frame 40
SLC12A9	solute carrier family 12 member 9
RXRB	retinoid X receptor beta
HAVCR1	hepatitis A virus cellular receptor 1
C12orf57	chromosome 12 open reading frame 57
PISD	phosphatidylserine decarboxylase
EYA3	EYA transcriptional coactivator and phosphatase 3
TOR1AIP2	torsin 1A interacting protein 2
DTNA	dystrobrevin alpha
SEC22C	SEC22 homolog C, vesicle trafficking protein
C7orf50	chromosome 7 open reading frame 50
SNHG3	small nucleolar RNA host gene 3
INTS10	integrator complex subunit 10
SNORA73B	small nucleolar RNA, H/ACA box 73B
KIF27	kinesin family member 27
LMBRD1	LMBR1 domain containing 1
C12orf4	chromosome 12 open reading frame 4
EDA2R	ectodysplasin A2 receptor
SNORD99	small nucleolar RNA, C/D box 99
SNORA44	small nucleolar RNA, H/ACA box 44
SNORA16A	small nucleolar RNA, H/ACA box 16A
GTF2H4	general transcription factor IIH subunit 4
LINC01715	long intergenic non-protein coding RNA 1715
KPNA2	karyopherin subunit alpha 2
B3GALNT1	beta-1,3-N-acetylgalactosaminyltransferase 1 (globoside blood group)
ICAM3	intercellular adhesion molecule 3
APOBEC3C	apolipoprotein B mRNA editing enzyme catalytic subunit 3C
BAG6	BCL2 associated athanogene 6
PTBP3	polypyrimidine tract binding protein 3
ITPA	inosine triphosphatase
CNNM1	cyclin and CBS domain divalent metal cation transport mediator 1
VWA3B	von Willebrand factor A domain containing 3B
KIF13A	kinesin family member 13A
MIR4420	microRNA 4420
DGLUCY	D-glutamate cyclase
ARMT1	acidic residue methyltransferase 1
THBS4	thrombospondin 4
PCDHGB6	protocadherin gamma subfamily B, 6
SNORD103C	small nucleolar RNA, C/D box 103C
GGA3	golgi associated, gamma adaptin ear containing, ARF binding protein 3
MYO6	myosin VI
NR2C2AP	nuclear receptor 2C2 associated protein
CD36	CD36 molecule
ZNF174	zinc finger protein 174
ZNF169	zinc finger protein 169
ZNF165	zinc finger protein 165
ZNF157	zinc finger protein 157
CNTN5	contactin 5
NKX2-8	NK2 homeobox 8
PITPNM3	PITPNM family member 3
SNCA	synuclein alpha
SNX13	sorting nexin 13
PCNX3	pecanex 3
MINDY4	MINDY lysine 48 deubiquitinase 4
MIR5585	microRNA 5585
PTTG1	PTTG1 regulator of sister chromatid separation, securin
HLA-A	major histocompatibility complex, class I, A
TMEM234	transmembrane protein 234
FGF1	fibroblast growth factor 1
GPD1	glycerol-3-phosphate dehydrogenase 1
MTMR9LP	myotubularin related protein 9 like, pseudogene
PFKP	phosphofructokinase, platelet
RPLP0	ribosomal protein lateral stalk subunit P0
HMBOX1	homeobox containing 1
ACBD4	acyl-CoA binding domain containing 4
HNF1B	HNF1 homeobox B
SLC26A5	solute carrier family 26 member 5
SLC4A10	solute carrier family 4 member 10
CDC45	cell division cycle 45
ATG7	autophagy related 7
RNASEH2A	ribonuclease H2 subunit A
TFF1	trefoil factor 1
TFAP4	transcription factor AP-4
PPP2R1B	protein phosphatase 2 scaffold subunit Abeta
PPP2CA	protein phosphatase 2 catalytic subunit alpha
TEF	TEF transcription factor, PAR bZIP family member
PPP1CC	protein phosphatase 1 catalytic subunit gamma
S100PBP	S100P binding protein
ANKS1B	ankyrin repeat and sterile alpha motif domain containing 1B
ACACB	acetyl-CoA carboxylase beta
ITCH	itchy E3 ubiquitin protein ligase
WAS	WASP actin nucleation promoting factor
VDR	vitamin D receptor
UROD	uroporphyrinogen decarboxylase
TSHR	thyroid stimulating hormone receptor
MARCKSL1	MARCKS like 1
DRAM2	DNA damage regulated autophagy modulator 2
RASAL1	RAS protein activator like 1
PPP1R3B	protein phosphatase 1 regulatory subunit 3B
TOR2A	torsin family 2 member A
ALAD	aminolevulinate dehydratase
SLC12A7	solute carrier family 12 member 7
LMBR1L	limb development membrane protein 1 like
ZNF415	zinc finger protein 415
HNRNPM	heterogeneous nuclear ribonucleoprotein M
SHROOM3	shroom family member 3
TUBAL3	tubulin alpha like 3
FAM57A	NA
PDZD3	PDZ domain containing 3
CDC14A	cell division cycle 14A
B3GNT9	UDP-GlcNAc:betaGal beta-1,3-N-acetylglucosaminyltransferase 9
LOC653160	uncharacterized LOC653160
TMEM35B	transmembrane protein 35B
EXO1	exonuclease 1
CAMKK2	calcium/calmodulin dependent protein kinase kinase 2
ARNTL	aryl hydrocarbon receptor nuclear translocator like
ZNF888	zinc finger protein 888
BHMG1	basic helix-loop-helix and HMG-box containing 1
UCK1	uridine-cytidine kinase 1
GIMAP2	GTPase, IMAP family member 2
NOC2L	NOC2 like nucleolar associated transcriptional repressor
JMJD6	jumonji domain containing 6, arginine demethylase and lysine hydroxylase
TRIM9	tripartite motif containing 9
ARL6IP1	ADP ribosylation factor like GTPase 6 interacting protein 1
KANK1	KN motif and ankyrin repeat domains 1
MESD	mesoderm development LRP chaperone
SIDT1	SID1 transmembrane family member 1
AGO4	argonaute RISC component 4
TMEM126B	transmembrane protein 126B
LAG3	lymphocyte activating 3
KRT83	keratin 83
NSD2	nuclear receptor binding SET domain protein 2
VCAM1	vascular cell adhesion molecule 1
UBA52	ubiquitin A-52 residue ribosomal protein fusion product 1
EVA1B	eva-1 homolog B
SRF	serum response factor
KLF13	Kruppel like factor 13
CAMK4	calcium/calmodulin dependent protein kinase IV
SNRPN	small nuclear ribonucleoprotein polypeptide N
FLRT1	fibronectin leucine rich transmembrane protein 1
RACGAP1	Rac GTPase activating protein 1
PLPPR3	phospholipid phosphatase related 3
L1CAM	L1 cell adhesion molecule
GAS2	growth arrest specific 2
RPL6	ribosomal protein L6
DPP8	dipeptidyl peptidase 8
MIR5581	microRNA 5581
NEPRO	nucleolus and neural progenitor protein
JAK1	Janus kinase 1
TANGO2	transport and golgi organization 2 homolog
ACER3	alkaline ceramidase 3
RTN4	reticulon 4
PCDH9	protocadherin 9
AACS	acetoacetyl-CoA synthetase
DMAC2	distal membrane arm assembly complex 2
DUSP13	dual specificity phosphatase 13
CAPRIN2	caprin family member 2
TMEM183B	transmembrane protein 183B
ZER1	zyg-11 related cell cycle regulator
GDI2	GDP dissociation inhibitor 2
ELK4	ETS transcription factor ELK4
DDX20	DEAD-box helicase 20
AKAP10	A-kinase anchoring protein 10
A4GALT	alpha 1,4-galactosyltransferase (P blood group)
SALL4	spalt like transcription factor 4
TAOK3	TAO kinase 3
MYCBP	MYC binding protein
LOC105378663	uncharacterized LOC105378663
CCDC138	coiled-coil domain containing 138
ARMCX2	armadillo repeat containing X-linked 2
SLC25A14	solute carrier family 25 member 14
SLC29A1	solute carrier family 29 member 1 (Augustine blood group)
KIAA0754	KIAA0754
TRPM2	transient receptor potential cation channel subfamily M member 2
OXCT2P1	3-oxoacid CoA-transferase 2 pseudogene 1
PPIEL	peptidylprolyl isomerase E like pseudogene
KARS	NA
ARRB2	arrestin beta 2
LOC101929516	NA
C10orf128	NA
TRIR	telomerase RNA component interacting RNase
PCM1	pericentriolar material 1
PAWR	pro-apoptotic WT1 regulator
MTMR1	myotubularin related protein 1
MTRF1	mitochondrial translation release factor 1
GPRC5B	G protein-coupled receptor class C group 5 member B
BCAR1	BCAR1 scaffold protein, Cas family member
MAGI2-AS3	MAGI2 antisense RNA 3
ZNF345	zinc finger protein 345
LINC00640	long intergenic non-protein coding RNA 640
ATP2B2	ATPase plasma membrane Ca2+ transporting 2
MLH1	mutL homolog 1
LINC00487	long intergenic non-protein coding RNA 487
LINC00837	long intergenic non-protein coding RNA 837
DCAF11	DDB1 and CUL4 associated factor 11
ZRANB2-AS1	ZRANB2 antisense RNA 1
LINC00941	long intergenic non-protein coding RNA 941
MKNK1-AS1	MKNK1 antisense RNA 1
LINC00886	long intergenic non-protein coding RNA 886
LINC00865	long intergenic non-protein coding RNA 865
TSC22D1-AS1	TSC22D1 antisense RNA 1
BCL2L12	BCL2 like 12
RPL34	ribosomal protein L34
KIAA0040	KIAA0040
ALG9	ALG9 alpha-1,2-mannosyltransferase
PGAP3	post-GPI attachment to proteins phospholipase 3
ZNF112	zinc finger protein 112
PDE1B	phosphodiesterase 1B
PPM1L	protein phosphatase, Mg2+/Mn2+ dependent 1L
ITGA6	integrin subunit alpha 6
VWF	von Willebrand factor
DNPEP	aspartyl aminopeptidase
MPP2	membrane palmitoylated protein 2
POLDIP2	DNA polymerase delta interacting protein 2
COLGALT1	collagen beta(1-O)galactosyltransferase 1
LSM14A	LSM14A mRNA processing body assembly factor
RAI14	retinoic acid induced 14
ERC2	ELKS/RAB6-interacting/CAST family member 2
ARID4A	AT-rich interaction domain 4A
TMEM41B	transmembrane protein 41B
ZNF517	zinc finger protein 517
SIPA1L1	signal induced proliferation associated 1 like 1
SLFNL1-AS1	SLFNL1 antisense RNA 1
COG5	component of oligomeric golgi complex 5
HKR1	NA
DNAJA4	DnaJ heat shock protein family (Hsp40) member A4
VAV2	vav guanine nucleotide exchange factor 2
ADGRF3	adhesion G protein-coupled receptor F3
CNTN6	contactin 6
NUP62	nucleoporin 62
RCHY1	ring finger and CHY zinc finger domain containing 1
ATG13	autophagy related 13
RFXAP	regulatory factor X associated protein
USP28	ubiquitin specific peptidase 28
GLE1	GLE1 RNA export mediator
ENPEP	glutamyl aminopeptidase
GNS	glucosamine (N-acetyl)-6-sulfatase
ENO3	enolase 3
GCLC	glutamate-cysteine ligase catalytic subunit
B4GALT1	beta-1,4-galactosyltransferase 1
GFRA2	GDNF family receptor alpha 2
MIR4446	microRNA 4446
STAG3L2	stromal antigen 3-like 2 (pseudogene)
LINC00266-1	long intergenic non-protein coding RNA 266-1
ANKS3	ankyrin repeat and sterile alpha motif domain containing 3
ZNF410	zinc finger protein 410
WWTR1-AS1	WWTR1 antisense RNA 1
SPNS1	sphingolipid transporter 1 (putative)
FAM156A	family with sequence similarity 156 member A
C16orf72	chromosome 16 open reading frame 72
DNAJB9	DnaJ heat shock protein family (Hsp40) member B9
ATAD2	ATPase family AAA domain containing 2
LOC339539	uncharacterized LOC339539
MUC20	mucin 20, cell surface associated
GSK3A	glycogen synthase kinase 3 alpha
MYH7B	myosin heavy chain 7B
CDV3	CDV3 homolog
GAS7	growth arrest specific 7
IL31RA	interleukin 31 receptor A
GFOD1	glucose-fructose oxidoreductase domain containing 1
CMPK1	cytidine/uridine monophosphate kinase 1
APH1A	aph-1 homolog A, gamma-secretase subunit
MED8	mediator complex subunit 8
KIF5B	kinesin family member 5B
KIF2A	kinesin family member 2A
POLR2K	RNA polymerase II subunit K
SZT2-AS1	SZT2 antisense RNA 1
DHRS1	dehydrogenase/reductase 1
ZNF600	zinc finger protein 600
IZUMO1	izumo sperm-egg fusion 1
KDM4A-AS1	KDM4A antisense RNA 1
CHODL	chondrolectin
YY1AP1	YY1 associated protein 1
XPO1	exportin 1
TATDN1	TatD DNase domain containing 1
BCAS1	breast carcinoma amplified sequence 1
MTBP	MDM2 binding protein
ATPAF1	ATP synthase mitochondrial F1 complex assembly factor 1
C16orf58	chromosome 16 open reading frame 58
GABBR1	gamma-aminobutyric acid type B receptor subunit 1
NSD1	nuclear receptor binding SET domain protein 1
NDUFS7	NADH:ubiquinone oxidoreductase core subunit S7
DCTN3	dynactin subunit 3
DCAF10	DDB1 and CUL4 associated factor 10
ASCC2	activating signal cointegrator 1 complex subunit 2
MXI1	MAX interactor 1, dimerization protein
SLC26A7	solute carrier family 26 member 7
RGS3	regulator of G protein signaling 3
TNFRSF18	TNF receptor superfamily member 18
WFDC2	WAP four-disulfide core domain 2
MIR6079	microRNA 6079
TTC39B	tetratricopeptide repeat domain 39B
RASGEF1A	RasGEF domain family member 1A
TAMM41	TAM41 mitochondrial translocator assembly and maintenance homolog
CCDC24	coiled-coil domain containing 24
METTL4	methyltransferase like 4
DLGAP1	DLG associated protein 1
CPNE9	copine family member 9
EDF1	endothelial differentiation related factor 1
TBCC	tubulin folding cofactor C
TCF7	transcription factor 7
SLC8A3	solute carrier family 8 member A3
ANTXR2	ANTXR cell adhesion molecule 2
OLFM3	olfactomedin 3
UBE2J2	ubiquitin conjugating enzyme E2 J2
TSR2	TSR2 ribosome maturation factor
RPL13	ribosomal protein L13
PML	promyelocytic leukemia
NAA15	N(alpha)-acetyltransferase 15, NatA auxiliary subunit
PEX16	peroxisomal biogenesis factor 16
ERI3-IT1	ERI3 intronic transcript 1
SRPX	sushi repeat containing protein X-linked
PNISR	PNN interacting serine and arginine rich protein
SURF2	surfeit 2
GANAB	glucosidase II alpha subunit
CFAP298	cilia and flagella associated protein 298
SNORD145	small nucleolar RNA, C/D box 145
PDGFRA	platelet derived growth factor receptor alpha
ME3	malic enzyme 3
RUBCN	rubicon autophagy regulator
KIAA0355	KIAA0355
SNORD55	small nucleolar RNA, C/D box 55
SNORD46	small nucleolar RNA, C/D box 46
SNORD38A	small nucleolar RNA, C/D box 38A
SNORD38B	small nucleolar RNA, C/D box 38B
STS	steroid sulfatase
ZNF133	zinc finger protein 133
KIAA0391	NA
SMG6	SMG6 nonsense mediated mRNA decay factor
PAX2	paired box 2
ARIH2	ariadne RBR E3 ubiquitin protein ligase 2
MTMR14	myotubularin related protein 14
TMEM168	transmembrane protein 168
TMEM267	transmembrane protein 267
ARAP3	ArfGAP with RhoGAP domain, ankyrin repeat and PH domain 3
KLHL25	kelch like family member 25
CDH24	cadherin 24
ZNF350	zinc finger protein 350
GNB4	G protein subunit beta 4
TAF1	TATA-box binding protein associated factor 1
GRM2	glutamate metabotropic receptor 2
PRPF4	pre-mRNA processing factor 4
DHX8	DEAH-box helicase 8
TPM1	tropomyosin 1
NME4	NME/NM23 nucleoside diphosphate kinase 4
NPFF	neuropeptide FF-amide peptide precursor
RTCA	RNA 3'-terminal phosphate cyclase
HLA-G	major histocompatibility complex, class I, G
SKAP1	src kinase associated phosphoprotein 1
SPTA1	spectrin alpha, erythrocytic 1
PSMG1	proteasome assembly chaperone 1
AK2	adenylate kinase 2
AZIN1	antizyme inhibitor 1
VILL	villin like
ZNF593	zinc finger protein 593
VPS13B	vacuolar protein sorting 13 homolog B
CBLB	Cbl proto-oncogene B
LTBP3	latent transforming growth factor beta binding protein 3
PLCH2	phospholipase C eta 2
ITPRIP	inositol 1,4,5-trisphosphate receptor interacting protein
MOK	MOK protein kinase
PDPR	pyruvate dehydrogenase phosphatase regulatory subunit
NUDT12	nudix hydrolase 12
MAGOHB	mago homolog B, exon junction complex subunit
PARPBP	PARP1 binding protein
NSUN4	NOP2/Sun RNA methyltransferase 4
ANKRD6	ankyrin repeat domain 6
FAAHP1	fatty acid amide hydrolase pseudogene 1
POU6F1	POU class 6 homeobox 1
THRB	thyroid hormone receptor beta
CD101	CD101 molecule
YWHAQ	tyrosine 3-monooxygenase/tryptophan 5-monooxygenase activation protein theta
EBNA1BP2	EBNA1 binding protein 2
CYB5R3	cytochrome b5 reductase 3
ATG4D	autophagy related 4D cysteine peptidase
ZNF184	zinc finger protein 184
PITRM1	pitrilysin metallopeptidase 1
SLC35E1	solute carrier family 35 member E1
CNTD2	cyclin N-terminal domain containing 2
FGFR1	fibroblast growth factor receptor 1
SYNPO2L	synaptopodin 2 like
TNIP3	TNFAIP3 interacting protein 3
FHIT	fragile histidine triad diadenosine triphosphatase
PFKFB1	6-phosphofructo-2-kinase/fructose-2,6-biphosphatase 1
POLD1	DNA polymerase delta 1, catalytic subunit
APC	APC regulator of WNT signaling pathway
LINC00441	NA
AKR1E2	aldo-keto reductase family 1 member E2
MEG3	maternally expressed 3
PSD	pleckstrin and Sec7 domain containing
RNF8	ring finger protein 8
CD274	CD274 molecule
C17orf80	chromosome 17 open reading frame 80
SNX17	sorting nexin 17
WDR13	WD repeat domain 13
KRT85	keratin 85
LINC01389	long intergenic non-protein coding RNA 1389
PLA2G4A	phospholipase A2 group IVA
PUS1	pseudouridine synthase 1
KCNQ5	potassium voltage-gated channel subfamily Q member 5
MKRN1	makorin ring finger protein 1
DIS3L	DIS3 like exosome 3'-5' exoribonuclease
SNAP47	synaptosome associated protein 47
FOPNL	FGFR1OP N-terminal like
UROS	uroporphyrinogen III synthase
MAP3K14-AS1	MAP3K14 antisense RNA 1
UPP1	uridine phosphorylase 1
KIAA1191	KIAA1191
DMXL2	Dmx like 2
ZFYVE27	zinc finger FYVE-type containing 27
VEZT	vezatin, adherens junctions transmembrane protein
ADPRH	ADP-ribosylarginine hydrolase
PDK1	pyruvate dehydrogenase kinase 1
LINC01562	long intergenic non-protein coding RNA 1562
TRMT112	tRNA methyltransferase subunit 11-2
UBXN1	UBX domain protein 1
RPA2	replication protein A2
ATP2A1	ATPase sarcoplasmic/endoplasmic reticulum Ca2+ transporting 1
MOV10	Mov10 RISC complex RNA helicase
FLVCR1-AS1	NA
SAE1	SUMO1 activating enzyme subunit 1
SRRM2-AS1	SRRM2 antisense RNA 1
PRDM10	PR/SET domain 10
C2orf27A	chromosome 2 open reading frame 27A
GRHL3	grainyhead like transcription factor 3
PRCP	prolylcarboxypeptidase
UBOX5	U-box domain containing 5
PRC1	protein regulator of cytokinesis 1
EHMT1	euchromatic histone lysine methyltransferase 1
UBE3A	ubiquitin protein ligase E3A
TRPC4AP	transient receptor potential cation channel subfamily C member 4 associated protein
HDAC2	histone deacetylase 2
ARL13B	ADP ribosylation factor like GTPase 13B
AMZ2	archaelysin family metallopeptidase 2
RBM15	RNA binding motif protein 15
AEN	apoptosis enhancing nuclease
CERK	ceramide kinase
MTHFSD	methenyltetrahydrofolate synthetase domain containing
FNDC3B	fibronectin type III domain containing 3B
RMND5B	required for meiotic nuclear division 5 homolog B
C11orf1	chromosome 11 open reading frame 1
PCED1A	PC-esterase domain containing 1A
C6orf106	NA
DISC1	DISC1 scaffold protein
STAT4	signal transducer and activator of transcription 4
CACNA1B	calcium voltage-gated channel subunit alpha1 B
VARS2	valyl-tRNA synthetase 2, mitochondrial
PATZ1	POZ/BTB and AT hook containing zinc finger 1
POMT1	protein O-mannosyltransferase 1
R3HCC1L	R3H domain and coiled-coil containing 1 like
MAP3K7	mitogen-activated protein kinase kinase kinase 7
DNAH14	dynein axonemal heavy chain 14
IGFBP2	insulin like growth factor binding protein 2
RCBTB2	RCC1 and BTB domain containing protein 2
SHISAL2A	shisa like 2A
TSGA10	testis specific 10
WRB	NA
EPB41L2	erythrocyte membrane protein band 4.1 like 2
SLC9A5	solute carrier family 9 member A5
AZIN2	antizyme inhibitor 2
FAM131B	family with sequence similarity 131 member B
TMEM177	transmembrane protein 177
BAG1	BCL2 associated athanogene 1
IL1A	interleukin 1 alpha
RPL19	ribosomal protein L19
GDF5	growth differentiation factor 5
SLC1A7	solute carrier family 1 member 7
IDH3B	isocitrate dehydrogenase (NAD(+)) 3 non-catalytic subunit beta
KDM6A	lysine demethylase 6A
LINC01260	long intergenic non-protein coding RNA 1260
LOC100507564	uncharacterized LOC100507564
CAPN14	calpain 14
LINC01771	long intergenic non-protein coding RNA 1771
XPNPEP1	X-prolyl aminopeptidase 1
TNRC6A	trinucleotide repeat containing adaptor 6A
NDC1	NDC1 transmembrane nucleoporin
YIPF1	Yip1 domain family member 1
NR2F1-AS1	NR2F1 antisense RNA 1
HSPB11	heat shock protein family B (small) member 11
CLCN2	chloride voltage-gated channel 2
PGPEP1	pyroglutamyl-peptidase I
SLC30A6	solute carrier family 30 member 6
NOS1AP	nitric oxide synthase 1 adaptor protein
NAGLU	N-acetyl-alpha-glucosaminidase
TCEANC2	transcription elongation factor A N-terminal and central domain containing 2
NAT9	N-acetyltransferase 9 (putative)
RPS6KC1	ribosomal protein S6 kinase C1
RTEL1	regulator of telomere elongation helicase 1
SPEF2	sperm flagellar 2
RNF145	ring finger protein 145
ZMAT2	zinc finger matrin-type 2
NOC4L	nucleolar complex associated 4 homolog
SLC30A5	solute carrier family 30 member 5
TMEM106C	transmembrane protein 106C
XYLT2	xylosyltransferase 2
ALG8	ALG8 alpha-1,3-glucosyltransferase
C17orf75	chromosome 17 open reading frame 75
UBL5	ubiquitin like 5
ABCG4	ATP binding cassette subfamily G member 4
KDELC1	NA
WDR18	WD repeat domain 18
ASB9	ankyrin repeat and SOCS box containing 9
IFIH1	interferon induced with helicase C domain 1
ASPSCR1	ASPSCR1 tether for SLC2A4, UBX domain containing
PRRG4	proline rich and Gla domain 4
NOD2	nucleotide binding oligomerization domain containing 2
TTLL6	tubulin tyrosine ligase like 6
HEXDC	NA
INO80E	INO80 complex subunit E
VWA3A	von Willebrand factor A domain containing 3A
LOC100507634	uncharacterized LOC100507634
CUL2	cullin 2
C8orf58	chromosome 8 open reading frame 58
FAM107B	family with sequence similarity 107 member B
PAX6	paired box 6
PXK	PX domain containing serine/threonine kinase like
RAP1GAP	RAP1 GTPase activating protein
DNMT3A	DNA methyltransferase 3 alpha
IKBKE	inhibitor of nuclear factor kappa B kinase subunit epsilon
MRPS18A	mitochondrial ribosomal protein S18A
FCMR	Fc fragment of IgM receptor
KCNH8	potassium voltage-gated channel subfamily H member 8
TMEM182	transmembrane protein 182
ZNF513	zinc finger protein 513
RFTN2	raftlin family member 2
TSACC	TSSK6 activating cochaperone
RIOX2	ribosomal oxygenase 2
ZGPAT	zinc finger CCCH-type and G-patch domain containing
NT5C1A	5'-nucleotidase, cytosolic IA
GABPB2	GA binding protein transcription factor subunit beta 2
LOC101926944	uncharacterized LOC101926944
MYADM	myeloid associated differentiation marker
ZNF302	zinc finger protein 302
PRPF40A	pre-mRNA processing factor 40 homolog A
CPA5	carboxypeptidase A5
MED21	mediator complex subunit 21
POLI	DNA polymerase iota
TM2D1	TM2 domain containing 1
PLRG1	pleiotropic regulator 1
CA6	carbonic anhydrase 6
TSPO	translocator protein
PSMA6	proteasome 20S subunit alpha 6
TNFSF13B	TNF superfamily member 13b
B4GALT2	beta-1,4-galactosyltransferase 2
B4GALT3	beta-1,4-galactosyltransferase 3
B4GALT4	beta-1,4-galactosyltransferase 4
MRPL40	mitochondrial ribosomal protein L40
GALNT4	polypeptide N-acetylgalactosaminyltransferase 4
HYAL2	hyaluronidase 2
JRKL	JRK like
SRSF9	serine and arginine rich splicing factor 9
SYK	spleen associated tyrosine kinase
STX10	syntaxin 10
SUV39H1	suppressor of variegation 3-9 homolog 1
STXBP1	syntaxin binding protein 1
VAMP8	vesicle associated membrane protein 8
RPS6KB1	ribosomal protein S6 kinase B1
EIF4G3	eukaryotic translation initiation factor 4 gamma 3
PGLYRP4	peptidoglycan recognition protein 4
CHRNA10	cholinergic receptor nicotinic alpha 10 subunit
NUP107	nucleoporin 107
LPAR5	lysophosphatidic acid receptor 5
GSDMB	gasdermin B
PBK	PDZ binding kinase
LINC00623	long intergenic non-protein coding RNA 623
KMT2E-AS1	KMT2E antisense RNA 1
SUPT7L	SPT7 like, STAGA complex gamma subunit
PXYLP1	2-phosphoxylose phosphatase 1
SLC25A17	solute carrier family 25 member 17
ITGB3BP	integrin subunit beta 3 binding protein
SP140L	SP140 nuclear body protein like
TPRA1	transmembrane protein adipocyte associated 1
TRAT1	T cell receptor associated transmembrane adaptor 1
TLX2	T cell leukemia homeobox 2
ICOSLG	inducible T cell costimulator ligand
GPRIN2	G protein regulated inducer of neurite outgrowth 2
CCDC144A	coiled-coil domain containing 144A
DOCK4	dedicator of cytokinesis 4
PIGN	phosphatidylinositol glycan anchor biosynthesis class N
PPP1R8	protein phosphatase 1 regulatory subunit 8
ZNF770	zinc finger protein 770
SLC43A3	solute carrier family 43 member 3
RAB5A	RAB5A, member RAS oncogene family
NMU	neuromedin U
HCLS1	hematopoietic cell-specific Lyn substrate 1
MTR	5-methyltetrahydrofolate-homocysteine methyltransferase
TMED4	transmembrane p24 trafficking protein 4
U2SURP	U2 snRNP associated SURP domain containing
TAB2	TGF-beta activated kinase 1 (MAP3K7) binding protein 2
LINC01359	long intergenic non-protein coding RNA 1359
FAHD1	fumarylacetoacetate hydrolase domain containing 1
SUCO	SUN domain containing ossification factor
TLE4	TLE family member 4, transcriptional corepressor
SPRY3	sprouty RTK signaling antagonist 3
DIS3	DIS3 homolog, exosome endoribonuclease and 3'-5' exoribonuclease
COMMD9	COMM domain containing 9
USP4	ubiquitin specific peptidase 4
TRPC1	transient receptor potential cation channel subfamily C member 1
LUC7L2	LUC7 like 2, pre-mRNA splicing factor
TFEC	transcription factor EC
AFAP1L1	actin filament associated protein 1 like 1
C1orf198	chromosome 1 open reading frame 198
QPCTL	glutaminyl-peptide cyclotransferase like
EWSR1	EWS RNA binding protein 1
LYRM4	LYR motif containing 4
AKR1C3	aldo-keto reductase family 1 member C3
FAM69A	NA
FOSB	FosB proto-oncogene, AP-1 transcription factor subunit
EPB42	erythrocyte membrane protein band 4.2
CTNNA2	catenin alpha 2
ALDH2	aldehyde dehydrogenase 2 family member
MR1	major histocompatibility complex, class I-related
SOD2	superoxide dismutase 2
MAP1S	microtubule associated protein 1S
PLEKHG6	pleckstrin homology and RhoGEF domain containing G6
FAM86C1	family with sequence similarity 86 member C1
KIAA1551	NA
RPRD1A	regulation of nuclear pre-mRNA domain containing 1A
STAU1	staufen double-stranded RNA binding protein 1
INTS13	integrator complex subunit 13
SLC28A3	solute carrier family 28 member 3
LHPP	phospholysine phosphohistidine inorganic pyrophosphate phosphatase
ARMH3	armadillo like helical domain containing 3
NEUROG3	neurogenin 3
CACNA1H	calcium voltage-gated channel subunit alpha1 H
PERP	p53 apoptosis effector related to PMP22
OXCT2	3-oxoacid CoA-transferase 2
TMPRSS3	transmembrane serine protease 3
RBM26	RNA binding motif protein 26
TSPYL2	TSPY like 2
FIGNL1	fidgetin like 1
PRDM15	PR/SET domain 15
STX11	syntaxin 11
GNB1L	G protein subunit beta 1 like
CSMD2	CUB and Sushi multiple domains 2
ABR	ABR activator of RhoGEF and GTPase
LIM2	lens intrinsic membrane protein 2
ARFRP1	ADP ribosylation factor related protein 1
MFSD11	major facilitator superfamily domain containing 11
RPS10	ribosomal protein S10
HNRNPR	heterogeneous nuclear ribonucleoprotein R
DERA	deoxyribose-phosphate aldolase
RANGAP1	Ran GTPase activating protein 1
ISCU	iron-sulfur cluster assembly enzyme
EAF2	ELL associated factor 2
DGKB	diacylglycerol kinase beta
ZNF148	zinc finger protein 148
BCKDHB	branched chain keto acid dehydrogenase E1 subunit beta
HMGA1	high mobility group AT-hook 1
TAF1B	TATA-box binding protein associated factor, RNA polymerase I subunit B
SRSF11	serine and arginine rich splicing factor 11
HHLA3	HERV-H LTR-associating 3
CLDN5	claudin 5
CFL2	cofilin 2
D2HGDH	D-2-hydroxyglutarate dehydrogenase
UBXN11	UBX domain protein 11
APOL1	apolipoprotein L1
GCSAM	germinal center associated signaling and motility
PPCDC	phosphopantothenoylcysteine decarboxylase
EIF3K	eukaryotic translation initiation factor 3 subunit K
SNX14	sorting nexin 14
AUH	AU RNA binding methylglutaconyl-CoA hydratase
ZNF304	zinc finger protein 304
FOXD2-AS1	FOXD2 adjacent opposite strand RNA 1
LINC00174	long intergenic non-protein coding RNA 174
C7orf13	NA
TYW3	tRNA-yW synthesizing protein 3 homolog
EIF5A	eukaryotic translation initiation factor 5A
ANAPC7	anaphase promoting complex subunit 7
SLC6A2	solute carrier family 6 member 2
NDUFB4	NADH:ubiquinone oxidoreductase subunit B4
TESC	tescalcin
GSN	gelsolin
DLSTP1	dihydrolipoamide S-succinyltransferase pseudogene 1
RABGGTB	Rab geranylgeranyltransferase subunit beta
SNORD45C	small nucleolar RNA, C/D box 45C
SNORD45A	small nucleolar RNA, C/D box 45A
SNORD45B	small nucleolar RNA, C/D box 45B
PRSS36	serine protease 36
PPP1R12A	protein phosphatase 1 regulatory subunit 12A
SNF8	SNF8 subunit of ESCRT-II
FAM57B	NA
ST6GALNAC3	ST6 N-acetylgalactosaminide alpha-2,6-sialyltransferase 3
CDH1	cadherin 1
GNAL	G protein subunit alpha L
ZNF155	zinc finger protein 155
HADHA	hydroxyacyl-CoA dehydrogenase trifunctional multienzyme complex subunit alpha
GUSB	glucuronidase beta
AMPD3	adenosine monophosphate deaminase 3
NR3C1	nuclear receptor subfamily 3 group C member 1
SURF1	SURF1 cytochrome c oxidase assembly factor
CSGALNACT1	chondroitin sulfate N-acetylgalactosaminyltransferase 1
F8A1	coagulation factor VIII associated 1
JAKMIP1	janus kinase and microtubule interacting protein 1
CCDC13	coiled-coil domain containing 13
ADA	adenosine deaminase
PMS2	PMS1 homolog 2, mismatch repair system component
XPR1	xenotropic and polytropic retrovirus receptor 1
ZNF25	zinc finger protein 25
TSHZ3	teashirt zinc finger homeobox 3
DLG3	discs large MAGUK scaffold protein 3
MINK1	misshapen like kinase 1
C10orf143	chromosome 10 open reading frame 143
NRBP1	nuclear receptor binding protein 1
IFI44	interferon induced protein 44
CDK2AP2	cyclin dependent kinase 2 associated protein 2
CDCA2	cell division cycle associated 2
KIAA0319	KIAA0319
TOP3A	DNA topoisomerase III alpha
DHRS3	dehydrogenase/reductase 3
SLC16A4	solute carrier family 16 member 4
SUPT6H	SPT6 homolog, histone chaperone and transcription elongation factor
ALDH4A1	aldehyde dehydrogenase 4 family member A1
LINC01725	long intergenic non-protein coding RNA 1725
LOC101927560	uncharacterized LOC101927560
OIP5	Opa interacting protein 5
TMEM25	transmembrane protein 25
NECTIN3	nectin cell adhesion molecule 3
L3MBTL1	L3MBTL histone methyl-lysine binding protein 1
WARS	NA
ZDHHC1	zinc finger DHHC-type containing 1
TRA2A	transformer 2 alpha homolog
ATF5	activating transcription factor 5
AKR7A3	aldo-keto reductase family 7 member A3
CPSF1	cleavage and polyadenylation specific factor 1
CCDC106	coiled-coil domain containing 106
FAM216A	family with sequence similarity 216 member A
PSMC3IP	PSMC3 interacting protein
STYXL1	serine/threonine/tyrosine interacting like 1
ADNP	activity dependent neuroprotector homeobox
A2M	alpha-2-macroglobulin
MARK3	microtubule affinity regulating kinase 3
YBEY	ybeY metalloendoribonuclease
ALDH18A1	aldehyde dehydrogenase 18 family member A1
INPP4A	inositol polyphosphate-4-phosphatase type I A
AHCY	adenosylhomocysteinase
MIR4423	microRNA 4423
GOLM1	golgi membrane protein 1
C1orf52	chromosome 1 open reading frame 52
HPGD	15-hydroxyprostaglandin dehydrogenase
LOC646626	uncharacterized LOC646626
FOXM1	forkhead box M1
RPS6KA5	ribosomal protein S6 kinase A5
RABEP1	rabaptin, RAB GTPase binding effector protein 1
CDKN1A	cyclin dependent kinase inhibitor 1A
ZBTB8A	zinc finger and BTB domain containing 8A
PPP1R2	protein phosphatase 1 regulatory inhibitor subunit 2
GPI	glucose-6-phosphate isomerase
GP1BA	glycoprotein Ib platelet subunit alpha
GNAT1	G protein subunit alpha transducin 1
COL24A1	collagen type XXIV alpha 1 chain
NREP	neuronal regeneration related protein
INTS12	integrator complex subunit 12
ANK1	ankyrin 1
DCUN1D1	defective in cullin neddylation 1 domain containing 1
PPIA	peptidylprolyl isomerase A
NUMBL	NUMB like endocytic adaptor protein
ANKLE1	ankyrin repeat and LEM domain containing 1
LOC105378828	NA
ATP13A2	ATPase cation transporting 13A2
R3HCC1	R3H domain and coiled-coil containing 1
NDUFB11	NADH:ubiquinone oxidoreductase subunit B11
MICB	MHC class I polypeptide-related sequence B
SELENOF	selenoprotein F
LINC01140	long intergenic non-protein coding RNA 1140
BCL11B	BAF chromatin remodeling complex subunit BCL11B
ZNF254	zinc finger protein 254
PKN2-AS1	PKN2 antisense RNA 1
SP3	Sp3 transcription factor
PPARGC1B	PPARG coactivator 1 beta
TJP2	tight junction protein 2
COPZ1	coatomer protein complex subunit zeta 1
KYAT3	kynurenine aminotransferase 3
GBP3	guanylate binding protein 3
RNPEP	arginyl aminopeptidase
HEXA	hexosaminidase subunit alpha
ZEB1	zinc finger E-box binding homeobox 1
ZFYVE19	zinc finger FYVE-type containing 19
FLT3	fms related tyrosine kinase 3
GBP1P1	guanylate binding protein 1 pseudogene 1
RAB30	RAB30, member RAS oncogene family
LRRC8C-DT	LRRC8C divergent transcript
GEMIN8P4	gem nuclear organelle associated protein 8 pseudogene 4
FEN1	flap structure-specific endonuclease 1
OSMR	oncostatin M receptor
LOC105378853	NA
DGKI	diacylglycerol kinase iota
RHOH	ras homolog family member H
CTDP1	CTD phosphatase subunit 1
DYRK1B	dual specificity tyrosine phosphorylation regulated kinase 1B
NEMF	nuclear export mediator factor
VAV3	vav guanine nucleotide exchange factor 3
SESN2	sestrin 2
PARP9	poly(ADP-ribose) polymerase family member 9
ZMIZ2	zinc finger MIZ-type containing 2
NAA16	N(alpha)-acetyltransferase 16, NatA auxiliary subunit
MCM10	minichromosome maintenance 10 replication initiation factor
LRRC59	leucine rich repeat containing 59
TMCO6	transmembrane and coiled-coil domains 6
CBWD1	COBW domain containing 1
TRMT10C	tRNA methyltransferase 10C, mitochondrial RNase P subunit
ORAI2	ORAI calcium release-activated calcium modulator 2
GLT8D1	glycosyltransferase 8 domain containing 1
SELENOS	selenoprotein S
PDP1	pyruvate dehyrogenase phosphatase catalytic subunit 1
MKL1	NA
RPA1	replication protein A1
SHISA5	shisa family member 5
ABI1	abl interactor 1
CNTN2	contactin 2
IL11RA	interleukin 11 receptor subunit alpha
HPSE2	heparanase 2 (inactive)
OCIAD2	OCIA domain containing 2
TMED5	transmembrane p24 trafficking protein 5
SMYD5	SMYD family member 5
CCDC18-AS1	CCDC18 antisense RNA 1
RIC8B	RIC8 guanine nucleotide exchange factor B
LMNA	lamin A/C
LIMK2	LIM domain kinase 2
CSNK2A3	casein kinase 2 alpha 3
IL15RA	interleukin 15 receptor subunit alpha
LOC100129046	NA
SLC50A1	solute carrier family 50 member 1
ZNF708	zinc finger protein 708
SLC25A40	solute carrier family 25 member 40
ANO10	anoctamin 10
GNG12	G protein subunit gamma 12
NSFL1C	NSFL1 cofactor
ATG16L1	autophagy related 16 like 1
TRIM68	tripartite motif containing 68
FANCL	FA complementation group L
IARS2	isoleucyl-tRNA synthetase 2, mitochondrial
SLC6A15	solute carrier family 6 member 15
NODAL	nodal growth differentiation factor
XKR8	XK related 8
VAC14	VAC14 component of PIKFYVE complex
CCDC40	coiled-coil domain containing 40
SYBU	syntabulin
ZNF780A	zinc finger protein 780A
IMPDH1	inosine monophosphate dehydrogenase 1
PALLD	palladin, cytoskeletal associated protein
PLEKHA8	pleckstrin homology domain containing A8
CCNT1	cyclin T1
TRAF3IP2-AS1	TRAF3IP2 antisense RNA 1
TMEM56-RWDD3	NA
DCAKD	dephospho-CoA kinase domain containing
CLEC4M	C-type lectin domain family 4 member M
DAB2IP	DAB2 interacting protein
TWNK	twinkle mtDNA helicase
MOV10L1	Mov10 like RISC complex RNA helicase 1
DMKN	dermokine
SNX7	sorting nexin 7
SPATA13	spermatogenesis associated 13
GALNT13	polypeptide N-acetylgalactosaminyltransferase 13
ZNF2	zinc finger protein 2
NPHP4	nephrocystin 4
DYNLT1	dynein light chain Tctex-type 1
TMEM106A	transmembrane protein 106A
TRAPPC12	trafficking protein particle complex 12
TRIM37	tripartite motif containing 37
NBR1	NBR1 autophagy cargo receptor
YTHDC2	YTH domain containing 2
IFITM1	interferon induced transmembrane protein 1
CWC27	CWC27 spliceosome associated cyclophilin
TRMT13	tRNA methyltransferase 13 homolog
COPS2	COP9 signalosome subunit 2
TGFB1I1	transforming growth factor beta 1 induced transcript 1
MSH6	mutS homolog 6
RTCA-AS1	RTCA antisense RNA 1
SGK1	serum/glucocorticoid regulated kinase 1
MIR553	microRNA 553
RREB1	ras responsive element binding protein 1
FAXC	failed axon connections homolog, metaxin like GST domain containing
FBXO11	F-box protein 11
WDR19	WD repeat domain 19
FUZ	fuzzy planar cell polarity protein
HKDC1	hexokinase domain containing 1
EXTL2	exostosin like glycosyltransferase 2
PRIMPOL	primase and DNA directed polymerase
KLHL24	kelch like family member 24
LOC102606465	uncharacterized LOC102606465
LOC101928370	uncharacterized LOC101928370
ANKRD9	ankyrin repeat domain 9
ELAC2	elaC ribonuclease Z 2
ZNF746	zinc finger protein 746
CPA4	carboxypeptidase A4
SMIM10	small integral membrane protein 10
TMEM62	transmembrane protein 62
MCOLN1	mucolipin 1
SPINK2	serine peptidase inhibitor, Kazal type 2
RECK	reversion inducing cysteine rich protein with kazal motifs
KIAA1217	KIAA1217
TWF1	twinfilin actin binding protein 1
SUPT4H1	SPT4 homolog, DSIF elongation factor subunit
CDKN2B-AS1	CDKN2B antisense RNA 1
SNX4	sorting nexin 4
REV1	REV1 DNA directed polymerase
C2orf74	chromosome 2 open reading frame 74
ACTG1P4	actin gamma 1 pseudogene 4
CD9	CD9 molecule
IL12RB2	interleukin 12 receptor subunit beta 2
HOXB3	homeobox B3
SLC35F5	solute carrier family 35 member F5
COPS4	COP9 signalosome subunit 4
PRKAG2	protein kinase AMP-activated non-catalytic subunit gamma 2
MAD1L1	mitotic arrest deficient 1 like 1
ZNF891	zinc finger protein 891
IGSF9B	immunoglobulin superfamily member 9B
PGAP2	post-GPI attachment to proteins 2
ZNF330	zinc finger protein 330
RBMS3	RNA binding motif single stranded interacting protein 3
APEX2	apurinic/apyrimidinic endodeoxyribonuclease 2
ZNF544	zinc finger protein 544
CRCP	CGRP receptor component
ARMC9	armadillo repeat containing 9
CCDC92	coiled-coil domain containing 92
PROSER1	proline and serine rich 1
OPA3	outer mitochondrial membrane lipid metabolism regulator OPA3
FHOD3	formin homology 2 domain containing 3
SAT2	spermidine/spermine N1-acetyltransferase family member 2
FGD5	FYVE, RhoGEF and PH domain containing 5
A2ML1	alpha-2-macroglobulin like 1
MAPK1IP1L	mitogen-activated protein kinase 1 interacting protein 1 like
CCDC114	coiled-coil domain containing 114
CDK1	cyclin dependent kinase 1
MYO1C	myosin IC
TMEM167B	transmembrane protein 167B
SCARNA2	small Cajal body-specific RNA 2
PLXNB3	plexin B3
TRAM1	translocation associated membrane protein 1
GFM1	G elongation factor mitochondrial 1
TMC5	transmembrane channel like 5
KLK14	kallikrein related peptidase 14
SLC22A23	solute carrier family 22 member 23
EEFSEC	eukaryotic elongation factor, selenocysteine-tRNA specific
GPRC5C	G protein-coupled receptor class C group 5 member C
ATG101	autophagy related 101
ZBTB26	zinc finger and BTB domain containing 26
RIC8A	RIC8 guanine nucleotide exchange factor A
DHX35	DEAH-box helicase 35
INTS8	integrator complex subunit 8
FXYD7	FXYD domain containing ion transport regulator 7
ADD3	adducin 3
PPM1A	protein phosphatase, Mg2+/Mn2+ dependent 1A
GPAM	glycerol-3-phosphate acyltransferase, mitochondrial
HIST1H3F	NA
PLXNA4	plexin A4
UBC	ubiquitin C
SCN2A	sodium voltage-gated channel alpha subunit 2
DPH7	diphthamide biosynthesis 7
FKBP3	FKBP prolyl isomerase 3
CUX1	cut like homeobox 1
HES6	hes family bHLH transcription factor 6
CHST12	carbohydrate sulfotransferase 12
WSB2	WD repeat and SOCS box containing 2
ETNK1	ethanolamine kinase 1
CSGALNACT2	chondroitin sulfate N-acetylgalactosaminyltransferase 2
CAMK2N1	calcium/calmodulin dependent protein kinase II inhibitor 1
STRADB	STE20 related adaptor beta
AP1AR	adaptor related protein complex 1 associated regulatory protein
SERINC2	serine incorporator 2
USP49	ubiquitin specific peptidase 49
GPALPP1	GPALPP motifs containing 1
GPR158	G protein-coupled receptor 158
SLTM	SAFB like transcription modulator
INTS2	integrator complex subunit 2
TKFC	triokinase and FMN cyclase
POLR2M	RNA polymerase II subunit M
C2CD3	C2 domain containing 3 centriole elongation regulator
BRCA1	BRCA1 DNA repair associated
REXO2	RNA exonuclease 2
MAGI1	membrane associated guanylate kinase, WW and PDZ domain containing 1
HINFP	histone H4 transcription factor
TSKU	tsukushi, small leucine rich proteoglycan
ABCB4	ATP binding cassette subfamily B member 4
PEG10	paternally expressed 10
FAN1	FANCD2 and FANCI associated nuclease 1
EPN2	epsin 2
PNMA2	PNMA family member 2
NECAP1	NECAP endocytosis associated 1
DHRS7B	dehydrogenase/reductase 7B
TIPARP	TCDD inducible poly(ADP-ribose) polymerase
TMEM87A	transmembrane protein 87A
SLC35E3	solute carrier family 35 member E3
GHRL	ghrelin and obestatin prepropeptide
ZNF658	zinc finger protein 658
MON1A	MON1 homolog A, secretory trafficking associated
BET1	Bet1 golgi vesicular membrane trafficking protein
PBXIP1	PBX homeobox interacting protein 1
EFCAB2	EF-hand calcium binding domain 2
NRG1	neuregulin 1
PITX2	paired like homeodomain 2
RPL10	ribosomal protein L10
APOBEC3F	apolipoprotein B mRNA editing enzyme catalytic subunit 3F
PTPDC1	protein tyrosine phosphatase domain containing 1
DUSP15	dual specificity phosphatase 15
RTTN	rotatin
ARL5A	ADP ribosylation factor like GTPase 5A
PPM1G	protein phosphatase, Mg2+/Mn2+ dependent 1G
ARL6	ADP ribosylation factor like GTPase 6
CASC4	cancer susceptibility 4
ST3GAL4	ST3 beta-galactoside alpha-2,3-sialyltransferase 4
NUDT16L1	nudix hydrolase 16 like 1
TMEM116	transmembrane protein 116
PIK3C2A	phosphatidylinositol-4-phosphate 3-kinase catalytic subunit type 2 alpha
FBXL2	F-box and leucine rich repeat protein 2
FOXP1	forkhead box P1
UIMC1	ubiquitin interaction motif containing 1
CEPT1	choline/ethanolamine phosphotransferase 1
TJAP1	tight junction associated protein 1
ACYP2	acylphosphatase 2
MST1R	macrophage stimulating 1 receptor
CLCN5	chloride voltage-gated channel 5
MBIP	MAP3K12 binding inhibitory protein 1
IRAK3	interleukin 1 receptor associated kinase 3
FAM111A	family with sequence similarity 111 member A
SULT2B1	sulfotransferase family 2B member 1
STX1A	syntaxin 1A
PSMG3-AS1	PSMG3 antisense RNA 1 (head to head)
SGPP2	sphingosine-1-phosphate phosphatase 2
ARMCX4	armadillo repeat containing X-linked 4
ELOVL1	ELOVL fatty acid elongase 1
ZBTB7B	zinc finger and BTB domain containing 7B
FAM212B-AS1	NA
LOC101928718	uncharacterized LOC101928718
EMP2	epithelial membrane protein 2
EMP1	epithelial membrane protein 1
HPS4	HPS4 biogenesis of lysosomal organelles complex 3 subunit 2
ZNF654	zinc finger protein 654
GRIK1	glutamate ionotropic receptor kainate type subunit 1
BOLA1	bolA family member 1
C1orf109	chromosome 1 open reading frame 109
PRPF38B	pre-mRNA processing factor 38B
RUBCNL	rubicon like autophagy enhancer
PRLR	prolactin receptor
CARS	NA
SLC16A1-AS1	SLC16A1 antisense RNA 1
PNPLA6	patatin like phospholipase domain containing 6
UFM1	ubiquitin fold modifier 1
GARNL3	GTPase activating Rap/RanGAP domain like 3
PRR22	proline rich 22
HK1	hexokinase 1
HGD	homogentisate 1,2-dioxygenase
CFH	complement factor H
ARSA	arylsulfatase A
APRT	adenine phosphoribosyltransferase
MVK	mevalonate kinase
GRINA	glutamate ionotropic receptor NMDA type subunit associated protein 1
PHTF1	putative homeodomain transcription factor 1
LRRC34	leucine rich repeat containing 34
ZNF555	zinc finger protein 555
DPY19L3	dpy-19 like C-mannosyltransferase 3
DNAI2	dynein axonemal intermediate chain 2
SLC30A8	solute carrier family 30 member 8
PGM1	phosphoglucomutase 1
RSBN1	round spermatid basic protein 1
AP4B1-AS1	AP4B1 antisense RNA 1
TADA2A	transcriptional adaptor 2A
ADCY10	adenylate cyclase 10
MFF	mitochondrial fission factor
SP140	SP140 nuclear body protein
FGFR3	fibroblast growth factor receptor 3
UBE2J1	ubiquitin conjugating enzyme E2 J1
DLEC1	DLEC1 cilia and flagella associated protein
KLRD1	killer cell lectin like receptor D1
KLRC3	killer cell lectin like receptor C3
IMMT	inner membrane mitochondrial protein
COPS5	COP9 signalosome subunit 5
COPS6	COP9 signalosome subunit 6
FERMT2	fermitin family member 2
UQCR11	ubiquinol-cytochrome c reductase, complex III subunit XI
KLF12	Kruppel like factor 12
DUSP12	dual specificity phosphatase 12
KLHL2	kelch like family member 2
ATXN2L	ataxin 2 like
DDX19B	DEAD-box helicase 19B
HSPA12A	heat shock protein family A (Hsp70) member 12A
MSL3	MSL complex subunit 3
CDKN2C	cyclin dependent kinase inhibitor 2C
VNN2	vanin 2
ADRA1A	adrenoceptor alpha 1A
RORA	RAR related orphan receptor A
DHPS	deoxyhypusine synthase
ANK2	ankyrin 2
PIGC	phosphatidylinositol glycan anchor biosynthesis class C
HNRNPA2B1	heterogeneous nuclear ribonucleoprotein A2/B1
DMD	dystrophin
KLHL28	kelch like family member 28
LINC01762	long intergenic non-protein coding RNA 1762
INPP5F	inositol polyphosphate-5-phosphatase F
ARHGEF9	Cdc42 guanine nucleotide exchange factor 9
TBC1D1	TBC1 domain family member 1
SESN1	sestrin 1
PRKACB	protein kinase cAMP-activated catalytic subunit beta
TMEM63C	transmembrane protein 63C
PARVG	parvin gamma
LOC101929099	uncharacterized LOC101929099
ANAPC10	anaphase promoting complex subunit 10
PRDM11	PR/SET domain 11
PCDHGB1	protocadherin gamma subfamily B, 1
C11orf71	chromosome 11 open reading frame 71
RIMS1	regulating synaptic membrane exocytosis 1
AKT1S1	AKT1 substrate 1
TGFBRAP1	transforming growth factor beta receptor associated protein 1
SLC22A13	solute carrier family 22 member 13
IL1R1	interleukin 1 receptor type 1
IFNLR1	interferon lambda receptor 1
TBX3	T-box transcription factor 3
LOC101929147	NA
CEACAM21	CEA cell adhesion molecule 21
TRIM2	tripartite motif containing 2
HSD3BP4	hydroxy-delta-5-steroid dehydrogenase, 3 beta, pseudogene 4
CTNNA1	catenin alpha 1
STX7	syntaxin 7
SLC4A3	solute carrier family 4 member 3
LOC100996724	phosphodiesterase 4D interacting protein-like
RNVU1-19	RNA, variant U1 small nuclear 19
CFAP61	cilia and flagella associated protein 61
LNPEP	leucyl and cystinyl aminopeptidase
OTUD5	OTU deubiquitinase 5
HIST2H2BA	NA
CCM2	CCM2 scaffold protein
VANGL1	VANGL planar cell polarity protein 1
KRR1	KRR1 small subunit processome component homolog
LOC645166	NA
DCTN1	dynactin subunit 1
FAM72C	family with sequence similarity 72 member C
SRGAP2D	SLIT-ROBO Rho GTPase activating protein 2D (pseudogene)
GINS3	GINS complex subunit 3
RNVU1-15	RNA, variant U1 small nuclear 15
CXCR3	C-X-C motif chemokine receptor 3
GP2	glycoprotein 2
GNRH2	gonadotropin releasing hormone 2
GATM	glycine amidinotransferase
ACOXL	acyl-CoA oxidase like
ZNF185	zinc finger protein 185 with LIM domain
PDE4B	phosphodiesterase 4B
MTHFR	methylenetetrahydrofolate reductase
LOC103091866	NA
RNVU1-14	RNA, variant U1 small nuclear 14
CAPN2	calpain 2
PPP2R2B	protein phosphatase 2 regulatory subunit Bbeta
METTL2A	methyltransferase like 2A
TMEM119	transmembrane protein 119
MICU3	mitochondrial calcium uptake family member 3
TMCO4	transmembrane and coiled-coil domains 4
ARHGAP30	Rho GTPase activating protein 30
ASPHD1	aspartate beta-hydroxylase domain containing 1
CENPV	centromere protein V
LCA5	lebercilin LCA5
UBXN2A	UBX domain protein 2A
HFE	homeostatic iron regulator
CANT1	calcium activated nucleotidase 1
MRRF	mitochondrial ribosome recycling factor
SLC25A46	solute carrier family 25 member 46
BAX	BCL2 associated X, apoptosis regulator
ABCD4	ATP binding cassette subfamily D member 4
ARHGEF2	Rho/Rac guanine nucleotide exchange factor 2
RBFOX2	RNA binding fox-1 homolog 2
FKTN	fukutin
COL18A1	collagen type XVIII alpha 1 chain
GNRHR2	gonadotropin releasing hormone receptor 2 (pseudogene)
SPAG8	sperm associated antigen 8
LINC01719	long intergenic non-protein coding RNA 1719
ASPDH	aspartate dehydrogenase domain containing
SZRD1	SUZ RNA binding domain containing 1
DHX36	DEAH-box helicase 36
CNTLN	centlein
PAPD4	NA
UPK3BL1	uroplakin 3B like 1
DDX3X	DEAD-box helicase 3 X-linked
TUBA8	tubulin alpha 8
PTPA	protein phosphatase 2 phosphatase activator
TERT	telomerase reverse transcriptase
HYDIN2	HYDIN axonemal central pair apparatus protein 2 (pseudogene)
IDI2-AS1	IDI2 antisense RNA 1
TIAM1	TIAM Rac1 associated GEF 1
NUDT1	nudix hydrolase 1
TGM2	transglutaminase 2
VSIG2	V-set and immunoglobulin domain containing 2
RGL1	ral guanine nucleotide dissociation stimulator like 1
CALM3	calmodulin 3
TROVE2	NA
CDCA3	cell division cycle associated 3
ALKBH6	alkB homolog 6
SERPINB6	serpin family B member 6
CCDC125	coiled-coil domain containing 125
PDP2	pyruvate dehyrogenase phosphatase catalytic subunit 2
PPP1R12B	protein phosphatase 1 regulatory subunit 12B
C1orf43	chromosome 1 open reading frame 43
TMCC2	transmembrane and coiled-coil domain family 2
ZNF417	zinc finger protein 417
SLC19A2	solute carrier family 19 member 2
RTL6	retrotransposon Gag like 6
ZDHHC18	zinc finger DHHC-type containing 18
MIR7-1	microRNA 7-1
ATP7A	ATPase copper transporting alpha
FBXL5	F-box and leucine rich repeat protein 5
VDAC1	voltage dependent anion channel 1
PAX5	paired box 5
VPS29	VPS29 retromer complex component
HSH2D	hematopoietic SH2 domain containing
SLC6A9	solute carrier family 6 member 9
LYST	lysosomal trafficking regulator
CRIP2	cysteine rich protein 2
SNRPD3	small nuclear ribonucleoprotein D3 polypeptide
SON	SON DNA binding protein
DHFR	dihydrofolate reductase
HIVEP3	HIVEP zinc finger 3
NDUFA7	NADH:ubiquinone oxidoreductase subunit A7
CCDC174	coiled-coil domain containing 174
SLC4A7	solute carrier family 4 member 7
LINC00624	long intergenic non-protein coding RNA 624
EFTUD2	elongation factor Tu GTP binding domain containing 2
ACP6	acid phosphatase 6, lysophosphatidic
OCRL	OCRL inositol polyphosphate-5-phosphatase
KBTBD4	kelch repeat and BTB domain containing 4
ZNF532	zinc finger protein 532
WDR46	WD repeat domain 46
RNVU1-7	RNA, variant U1 small nuclear 7
SMARCC2	SWI/SNF related, matrix associated, actin dependent regulator of chromatin subfamily c member 2
CYTH3	cytohesin 3
IL32	interleukin 32
NBPF11	NBPF member 11
MIR5087	microRNA 5087
RNVU1-1	RNA, variant U1 small nuclear 1
LOC100132057	phosphodiesterase 4D interacting protein pseudogene
RNVU1-3	RNA, variant U1 small nuclear 3
TTC21A	tetratricopeptide repeat domain 21A
KIFC2	kinesin family member C2
PHLDB2	pleckstrin homology like domain family B member 2
TRIP12	thyroid hormone receptor interactor 12
PCNP	PEST proteolytic signal containing nuclear protein
USP48	ubiquitin specific peptidase 48
ASCC1	activating signal cointegrator 1 complex subunit 1
C3orf18	chromosome 3 open reading frame 18
GBP1	guanylate binding protein 1
GATA1	GATA binding protein 1
E2F4	E2F transcription factor 4
GAS1	growth arrest specific 1
DUSP7	dual specificity phosphatase 7
CD320	CD320 molecule
SLC12A4	solute carrier family 12 member 4
TSC2	TSC complex subunit 2
UBA5	ubiquitin like modifier activating enzyme 5
LINC00869	long intergenic non-protein coding RNA 869
TBC1D23	TBC1 domain family member 23
ALOX5AP	arachidonate 5-lipoxygenase activating protein
AKT2	AKT serine/threonine kinase 2
RPL36AL	ribosomal protein L36a like
RPL39	ribosomal protein L39
MGAT1	alpha-1,3-mannosyl-glycoprotein 2-beta-N-acetylglucosaminyltransferase
SLC31A1	solute carrier family 31 member 1
MGAT2	alpha-1,6-mannosyl-glycoprotein 2-beta-N-acetylglucosaminyltransferase
MEF2C	myocyte enhancer factor 2C
VLDLR	very low density lipoprotein receptor
RAB29	RAB29, member RAS oncogene family
VIPR2	vasoactive intestinal peptide receptor 2
SKAP2	src kinase associated phosphoprotein 2
44443	NA
GLUD1	glutamate dehydrogenase 1
LOC105371433	uncharacterized LOC105371433
ARHGEF3	Rho guanine nucleotide exchange factor 3
MACROD2	mono-ADP ribosylhydrolase 2
FBXO28	F-box protein 28
GRHL2	grainyhead like transcription factor 2
MRPS15	mitochondrial ribosomal protein S15
RNF17	ring finger protein 17
PHC3	polyhomeotic homolog 3
TEX12	testis expressed 12
RBCK1	RANBP2-type and C3HC4-type zinc finger containing 1
DFFB	DNA fragmentation factor subunit beta
ARHGAP20	Rho GTPase activating protein 20
NDUFAF7	NADH:ubiquinone oxidoreductase complex assembly factor 7
SNIP1	Smad nuclear interacting protein 1
ZFP2	ZFP2 zinc finger protein
STARD13	StAR related lipid transfer domain containing 13
MMAB	metabolism of cobalamin associated B
OBSCN	obscurin, cytoskeletal calmodulin and titin-interacting RhoGEF
ADAMTSL4-AS1	ADAMTSL4 antisense RNA 1
LAMTOR4	late endosomal/lysosomal adaptor, MAPK and MTOR activator 4
NIT1	nitrilase 1
PLCL1	phospholipase C like 1 (inactive)
PLTP	phospholipid transfer protein
POLD2	DNA polymerase delta 2, accessory subunit
DNM1L	dynamin 1 like
DPP3	dipeptidyl peptidase 3
ODR4	odr-4 GPCR localization factor homolog
ABCC5	ATP binding cassette subfamily C member 5
GPR55	G protein-coupled receptor 55
ADGRG1	adhesion G protein-coupled receptor G1
TAF1A	TATA-box binding protein associated factor, RNA polymerase I subunit A
APOA1	apolipoprotein A1
BCL2L1	BCL2 like 1
SPAG4	sperm associated antigen 4
UAP1	UDP-N-acetylglucosamine pyrophosphorylase 1
SPAG1	sperm associated antigen 1
PDGFA	platelet derived growth factor subunit A
PDE9A	phosphodiesterase 9A
PDE8A	phosphodiesterase 8A
SP2	Sp2 transcription factor
ALK	ALK receptor tyrosine kinase
ARHGEF1	Rho guanine nucleotide exchange factor 1
FAM122C	family with sequence similarity 122C
RANBP3L	RAN binding protein 3 like
ANKRD35	ankyrin repeat domain 35
MXRA7	matrix remodeling associated 7
WDR73	WD repeat domain 73
KLRF1	killer cell lectin like receptor F1
CD24	CD24 molecule
ZCCHC9	zinc finger CCHC-type containing 9
PPP6R2	protein phosphatase 6 regulatory subunit 2
NSUN6	NOP2/Sun RNA methyltransferase 6
TCTEX1D2	Tctex1 domain containing 2
LDHB	lactate dehydrogenase B
INSM1	INSM transcriptional repressor 1
ITGA5	integrin subunit alpha 5
ORC6	origin recognition complex subunit 6
HEBP2	heme binding protein 2
ICE2	interactor of little elongation complex ELL subunit 2
HSPBAP1	HSPB1 associated protein 1
ETAA1	ETAA1 activator of ATR kinase
MAP7D3	MAP7 domain containing 3
SUCNR1	succinate receptor 1
MYBPC1	myosin binding protein C, slow type
LOC100507670	NA
MAST4	microtubule associated serine/threonine kinase family member 4
HEXIM2	HEXIM P-TEFb complex subunit 2
ACSS1	acyl-CoA synthetase short chain family member 1
GBAT2	glioblastoma multiforme-associated transcript 2
MX1	MX dynamin like GTPase 1
PSMB5	proteasome 20S subunit beta 5
NR1H3	nuclear receptor subfamily 1 group H member 3
PPP2R5D	protein phosphatase 2 regulatory subunit B'delta
ZNF692	zinc finger protein 692
ERAL1	Era like 12S mitochondrial rRNA chaperone 1
PPP2R5A	protein phosphatase 2 regulatory subunit B'alpha
PPP1R3D	protein phosphatase 1 regulatory subunit 3D
PPEF2	protein phosphatase with EF-hand domain 2
CLCC1	chloride channel CLIC like 1
ZNRD1	zinc ribbon domain containing 1
TAX1BP3	Tax1 binding protein 3
SEMA3E	semaphorin 3E
NOL4L	nucleolar protein 4 like
FAM98C	family with sequence similarity 98 member C
DZANK1	double zinc ribbon and ankyrin repeat domains 1
ZNF787	zinc finger protein 787
MRPL9	mitochondrial ribosomal protein L9
ABLIM2	actin binding LIM protein family member 2
STOML2	stomatin like 2
CTBP2	C-terminal binding protein 2
TSPAN10	tetraspanin 10
VPS11	VPS11 core subunit of CORVET and HOPS complexes
TDRKH-AS1	TDRKH antisense RNA 1
SPI1	Spi-1 proto-oncogene
UTY	ubiquitously transcribed tetratricopeptide repeat containing, Y-linked
OIP5-AS1	OIP5 antisense RNA 1
PIGL	phosphatidylinositol glycan anchor biosynthesis class L
CDAN1	codanin 1
NLRP11	NLR family pyrin domain containing 11
SUSD3	sushi domain containing 3
FLG-AS1	FLG antisense RNA 1
SAXO1	stabilizer of axonemal microtubules 1
RPS9	ribosomal protein S9
PDGFB	platelet derived growth factor subunit B
C16orf71	chromosome 16 open reading frame 71
GABRB3	gamma-aminobutyric acid type A receptor beta3 subunit
SPECC1	sperm antigen with calponin homology and coiled-coil domains 1
STARD4	StAR related lipid transfer domain containing 4
ALS2CR12	NA
CRB3	crumbs cell polarity complex component 3
DEPDC7	DEP domain containing 7
NEK7	NIMA related kinase 7
CCDC6	coiled-coil domain containing 6
PRMT2	protein arginine methyltransferase 2
ARHGAP26	Rho GTPase activating protein 26
REEP5	receptor accessory protein 5
LOC101928034	uncharacterized LOC101928034
TMEM254	transmembrane protein 254
ETNK2	ethanolamine kinase 2
SETD7	SET domain containing 7, histone lysine methyltransferase
MOSPD1	motile sperm domain containing 1
ARHGEF6	Rac/Cdc42 guanine nucleotide exchange factor 6
PHF21B	PHD finger protein 21B
CDK11B	cyclin dependent kinase 11B
RIC3	RIC3 acetylcholine receptor chaperone
MAP2K3	mitogen-activated protein kinase kinase 3
BSPRY	B-box and SPRY domain containing
PRUNE2	prune homolog 2 with BCH domain
ATP2A2	ATPase sarcoplasmic/endoplasmic reticulum Ca2+ transporting 2
LRRFIP1	LRR binding FLII interacting protein 1
CREB3L4	cAMP responsive element binding protein 3 like 4
TMX2	thioredoxin related transmembrane protein 2
FAM76A	family with sequence similarity 76 member A
SLAMF7	SLAM family member 7
PTGES3	prostaglandin E synthase 3
MADD	MAP kinase activating death domain
ADAMTS15	ADAM metallopeptidase with thrombospondin type 1 motif 15
[truncated: 15,766 more rows]

## Sheet: Gene_up_IL7
SOX21	SRY-box transcription factor 21
MITF	melanocyte inducing transcription factor
CAMTA1-DT	CAMTA1 divergent transcript
ABO	ABO, alpha 1-3-N-acetylgalactosaminyltransferase and alpha 1-3-galactosyltransferase
CCRL2	C-C motif chemokine receptor like 2
SHROOM3	shroom family member 3
MAGI2-AS3	MAGI2 antisense RNA 3
ATP2B2	ATPase plasma membrane Ca2+ transporting 2
ERC2	ELKS/RAB6-interacting/CAST family member 2
FAAHP1	fatty acid amide hydrolase pseudogene 1
GRHL3	grainyhead like transcription factor 3
RSPH9	radial spoke head component 9
KCNH8	potassium voltage-gated channel subfamily H member 8
CSMD2	CUB and Sushi multiple domains 2
LOC729970	hCG2028352-like
GRIK1	glutamate ionotropic receptor kainate type subunit 1
RUBCNL	rubicon like autophagy enhancer
PRLR	prolactin receptor
ADRA1A	adrenoceptor alpha 1A
CTBP2	C-terminal binding protein 2
ADAMTS15	ADAM metallopeptidase with thrombospondin type 1 motif 15
GBAP1	glucosylceramidase beta pseudogene 1
RASSF8	Ras association domain family member 8
PHYHIP	phytanoyl-CoA 2-hydroxylase interacting protein
CMKLR1	chemerin chemokine-like receptor 1
FRMD7	FERM domain containing 7
AXDND1	axonemal dynein light chain domain containing 1
GRAMD2A	GRAM domain containing 2A
LINC01036	long intergenic non-protein coding RNA 1036
LINC01003	long intergenic non-protein coding RNA 1003
BEND3P3	BEN domain containing 3 pseudogene 3
RLN2	relaxin 2
LINC01703	long intergenic non-protein coding RNA 1703
NEUROG2	neurogenin 2
LINC00840	long intergenic non-protein coding RNA 840
EDDM13	epididymal protein 13
LOC642361	uncharacterized LOC642361
PTPRD	protein tyrosine phosphatase receptor type D
SYNGR1	synaptogyrin 1
CFAP58-AS1	NA
SCIMP	SLP adaptor and CSK interacting membrane protein
ABHD16B	abhydrolase domain containing 16B
PDZK1	PDZ domain containing 1
SLC5A1	solute carrier family 5 member 1
NPBWR1	neuropeptides B and W receptor 1
NR2E3	nuclear receptor subfamily 2 group E member 3
LOC105369340	NA
CALB2	calbindin 2
GRIN2B	glutamate ionotropic receptor NMDA type subunit 2B
LOC101928424	uncharacterized LOC101928424
LOC100132078	uncharacterized LOC100132078
USP2-AS1	USP2 antisense RNA 1 (head to head)
PTPRN	protein tyrosine phosphatase receptor type N
ATP2C2	ATPase secretory pathway Ca2+ transporting 2
L3MBTL4	L3MBTL histone methyl-lysine binding protein 4
FAM47E	family with sequence similarity 47 member E
PADI4	peptidyl arginine deiminase 4
C6orf52	chromosome 6 open reading frame 52
GATA6	GATA binding protein 6
DNAAF1	dynein axonemal assembly factor 1
HOXA3	homeobox A3
CPEB1	cytoplasmic polyadenylation element binding protein 1
CAVIN2	caveolae associated protein 2
LINC02328	long intergenic non-protein coding RNA 2328
CCNE2	cyclin E2
PRODH	proline dehydrogenase 1
EHD4-AS1	EHD4 antisense RNA 1
KCNE1	potassium voltage-gated channel subfamily E regulatory subunit 1
LINC02255	long intergenic non-protein coding RNA 2255
LOC642423	NA
CYP4F3	cytochrome P450 family 4 subfamily F member 3
CHRNB4	cholinergic receptor nicotinic beta 4 subunit
LOC100128770	uncharacterized LOC100128770
ADAMTSL2	ADAMTS like 2
SLC52A1	solute carrier family 52 member 1
LOC102723692	uncharacterized LOC102723692
CRYBB2	crystallin beta B2
COL4A5	collagen type IV alpha 5 chain
ATP1A2	ATPase Na+/K+ transporting subunit alpha 2
NPTX2	neuronal pentraxin 2
CCL5	C-C motif chemokine ligand 5
ZNF502	zinc finger protein 502
SNORD3C	small nucleolar RNA, C/D box 3C
SLC16A11	solute carrier family 16 member 11
CNRIP1	cannabinoid receptor interacting protein 1
ZNF683	zinc finger protein 683
LOC653653	adaptor related protein complex 1 sigma 2 subunit pseudogene
LINC01979	long intergenic non-protein coding RNA 1979
IDO1	indoleamine 2,3-dioxygenase 1
TTLL9	tubulin tyrosine ligase like 9
SNORD135	small nucleolar RNA, C/D box 135
ZNF571-AS1	ZNF571 antisense RNA 1
RLN1	relaxin 1
IQSEC3	IQ motif and Sec7 domain ArfGEF 3
OR2L13	olfactory receptor family 2 subfamily L member 13
STBD1	starch binding domain 1
SPERT	NA
CMPK2	cytidine/uridine monophosphate kinase 2
MIR3681HG	MIR3681 host gene
HS1BP3-IT1	HS1BP3 intronic transcript 1
CCL2	C-C motif chemokine ligand 2
LINC00309	long intergenic non-protein coding RNA 309
LINC01964	long intergenic non-protein coding RNA 1964
SYT5	synaptotagmin 5
LOC105373496	uncharacterized LOC105373496
PKD2L1	polycystin 2 like 1, transient receptor potential cation channel
ADRA1B	adrenoceptor alpha 1B
ALDH3B1	aldehyde dehydrogenase 3 family member B1
LOC101928103	NA
GSAP	gamma-secretase activating protein
CCNO	cyclin O
MCM8-AS1	MCM8 antisense RNA 1
MIR3192	microRNA 3192
ATP1A3	ATPase Na+/K+ transporting subunit alpha 3
LOC729296	uncharacterized LOC729296
FAM19A5	NA
SNORA91	small nucleolar RNA, H/ACA box 91
ZNF541	zinc finger protein 541
ADORA2A-AS1	ADORA2A antisense RNA 1
ARHGAP31-AS1	ARHGAP31 antisense RNA 1
C6orf99	chromosome 6 open reading frame 99
LOC100506679	uncharacterized LOC100506679
KLHL33	kelch like family member 33
ZNF233	zinc finger protein 233
F2RL3	F2R like thrombin or trypsin receptor 3
TNC	tenascin C
IBA57-AS1	NA
LRRC46	leucine rich repeat containing 46
MIR544B	microRNA 544b
AMER2	APC membrane recruitment protein 2
BST1	bone marrow stromal cell antigen 1
LINC02506	long intergenic non-protein coding RNA 2506
LOC439933	uncharacterized LOC439933
ADAD2	adenosine deaminase domain containing 2
LINC01094	long intergenic non-protein coding RNA 1094
LOC101929595	uncharacterized LOC101929595
PRSS12	serine protease 12
LINC01018	long intergenic non-protein coding RNA 1018
LINC01948	long intergenic non-protein coding RNA 1948
LOC105379143	uncharacterized LOC105379143
BIRC7	baculoviral IAP repeat containing 7
ATP5MGL	ATP synthase membrane subunit g like
RASGRF2-AS1	RASGRF2 antisense RNA 1
RABEP2	rabaptin, RAB GTPase binding effector protein 2
CLEC4D	C-type lectin domain family 4 member D
DAZL	deleted in azoospermia like
CEBPE	CCAAT enhancer binding protein epsilon
MIR5189	microRNA 5189
BDP1	B double prime 1, subunit of RNA polymerase III transcription initiation factor IIIB
DNAH7	dynein axonemal heavy chain 7
FAM170B	family with sequence similarity 170 member B
SNORA5C	small nucleolar RNA, H/ACA box 5C
RNF126P1	ring finger protein 126 pseudogene 1
PMS2P7	PMS1 homolog 2, mismatch repair system component pseudogene 7
MYH16	myosin heavy chain 16 pseudogene
RSAD2	radical S-adenosyl methionine domain containing 2
MIR4653	microRNA 4653
CCDC38	coiled-coil domain containing 38
BAIAP2L2	BAR/IMD domain containing adaptor protein 2 like 2
KCNT2	potassium sodium-activated channel subfamily T member 2
MIR4665	microRNA 4665
FRG1JP	FSHD region gene 1 family member J, pseudogene
LOC100499484	NA
OSR1	odd-skipped related transcription factor 1
EPHA3	EPH receptor A3
MB	myoglobin
LINC02427	long intergenic non-protein coding RNA 2427
RSPO4	R-spondin 4
CPLX3	complexin 3
ACVRL1	activin A receptor like type 1
H3F3C	NA
LOC283387	uncharacterized LOC283387
LOC100128882	uncharacterized LOC100128882
TEX45	testis expressed 45
UBE2L5	ubiquitin conjugating enzyme E2 L5

## Sheet: Gene_down_IL7
LINC01521	long intergenic non-protein coding RNA 1521
RCAN3AS	RCAN3 antisense RNA
MIR6079	microRNA 6079
CLDN5	claudin 5
JSRP1	junctional sarcoplasmic reticulum protein 1
GLIS2	GLIS family zinc finger 2
CDCP2	CUB domain containing protein 2
TMEM246	NA
NTRK3	neurotrophic receptor tyrosine kinase 3
USP44	ubiquitin specific peptidase 44
LINC01348	long intergenic non-protein coding RNA 1348
INMT	indolethylamine N-methyltransferase
PFN2	profilin 2
FZD2	frizzled class receptor 2
LOH12CR2	loss of heterozygosity, 12, chromosomal region 2
DPY19L1P1	DPY19L1 pseudogene 1
GLT1D1	glycosyltransferase 1 domain containing 1
SASH1	SAM and SH3 domain containing 1
SYDE1	synapse defective Rho GTPase homolog 1
PARD3	par-3 family cell polarity regulator
CYB5R2	cytochrome b5 reductase 2
MIR7851	microRNA 7851
GRASP-AS1	GRASP antisense RNA 1
SOCS7	suppressor of cytokine signaling 7
CD8B	CD8b molecule
MIR3922	microRNA 3922
PLA2G4B	phospholipase A2 group IVB
SEMA4A	semaphorin 4A
GCM1	glial cells missing transcription factor 1
CHKB	choline kinase beta
LOC100288846	uncharacterized LOC100288846
CNTFR	ciliary neurotrophic factor receptor
SNORD116-29	small nucleolar RNA, C/D box 116-29
RCN3	reticulocalbin 3
JPH1	junctophilin 1
LOC100506083	uncharacterized LOC100506083
KCNK13	potassium two pore domain channel subfamily K member 13
GPR101	G protein-coupled receptor 101
CHIT1	chitinase 1
SRPK3	SRSF protein kinase 3
SLC39A5	solute carrier family 39 member 5
SPACA6P-AS	SPACA6P antisense RNA
CLGN	calmegin
SCN3A	sodium voltage-gated channel alpha subunit 3
TMEM221	transmembrane protein 221
S1PR3	sphingosine-1-phosphate receptor 3
CA3	carbonic anhydrase 3
SV2A	synaptic vesicle glycoprotein 2A
LOC101926935	uncharacterized LOC101926935
LOC105372795	uncharacterized LOC105372795
GPC3	glypican 3
ZNF117	zinc finger protein 117
BSN-AS2	NA
TRIM50	tripartite motif containing 50
RPL34-AS1	RPL34 antisense RNA 1 (head to head)
MIR571	microRNA 571
KLF15	Kruppel like factor 15
C16orf74	chromosome 16 open reading frame 74
MIR4642	microRNA 4642
NHS	NHS actin remodeling regulator
LOC102723672	uncharacterized LOC102723672
CNTF	ciliary neurotrophic factor
LOC100506098	uncharacterized LOC100506098
FAM151B	family with sequence similarity 151 member B
SNORA14A	small nucleolar RNA, H/ACA box 14A
PTPN14	protein tyrosine phosphatase non-receptor type 14
SLCO4A1-AS1	SLCO4A1 antisense RNA 1
FAM27C	family with sequence similarity 27 member C
LOC101928438	uncharacterized LOC101928438
RASA4	RAS p21 protein activator 4
WNT8B	Wnt family member 8B
LDLRAD2	low density lipoprotein receptor class A domain containing 2
OR56B1	olfactory receptor family 56 subfamily B member 1

## Sheet: Gene_insig_IL7
NSMF	NMDA receptor synaptonuclear signaling and neuronal migration factor
LOC729737	uncharacterized LOC729737
LOC100133331	uncharacterized LOC100133331
LOC100288069	uncharacterized LOC100288069
FAM87B	family with sequence similarity 87 member B
LINC00115	long intergenic non-protein coding RNA 115
NR1I2	nuclear receptor subfamily 1 group I member 2
TNFSF11	TNF superfamily member 11
CEP19	centrosomal protein 19
NLRP1	NLR family pyrin domain containing 1
LOC100130417	NA
AGL	amylo-alpha-1, 6-glucosidase, 4-alpha-glucanotransferase
NES	nestin
HSPA8	heat shock protein family A (Hsp70) member 8
MMP23B	matrix metallopeptidase 23B
NUDT6	nudix hydrolase 6
SNW1	SNW domain containing 1
FAF1	Fas associated factor 1
C1orf159	chromosome 1 open reading frame 159
ZCCHC4	zinc finger CCHC-type containing 4
TREM1	triggering receptor expressed on myeloid cells 1
PCBP4	poly(rC) binding protein 4
PPP2R2C	protein phosphatase 2 regulatory subunit Bgamma
CHMP1B	charged multivesicular body protein 1B
ATP13A1	ATPase 13A1
MRPL47	mitochondrial ribosomal protein L47
TPD52	tumor protein D52
MEOX1	mesenchyme homeobox 1
GJC2	gap junction protein gamma 2
JPH2	junctophilin 2
PHTF2	putative homeodomain transcription factor 2
CCDC28B	coiled-coil domain containing 28B
SNORD167	small nucleolar RNA, C/D box 167
ACHE	acetylcholinesterase (Cartwright blood group)
PUSL1	pseudouridine synthase like 1
CLASP1	cytoplasmic linker associated protein 1
NIPA1	NIPA magnesium transporter 1
NFATC4	nuclear factor of activated T cells 4
ASAH2	N-acylsphingosine amidohydrolase 2
RAN	RAN, member RAS oncogene family
S1PR4	sphingosine-1-phosphate receptor 4
AK7	adenylate kinase 7
LSS	lanosterol synthase
NIPAL3	NIPA like domain containing 3
CCNL2	cyclin L2
SLC35D2	solute carrier family 35 member D2
PPIE	peptidylprolyl isomerase E
CLEC12B	C-type lectin domain family 12 member B
ZC3H11A	zinc finger CCCH-type containing 11A
LOC148413	NA
CPSF2	cleavage and polyadenylation specific factor 2
LINC01770	long intergenic non-protein coding RNA 1770
PCBP3	poly(rC) binding protein 3
ADD2	adducin 2
CELF2	CUGBP Elav-like family member 2
TIAL1	TIA1 cytotoxic granule associated RNA binding protein like 1
ZNF248	zinc finger protein 248
NRXN1	neurexin 1
NTPCR	nucleoside-triphosphatase, cancer-related
TTYH2	tweety family member 2
PACSIN2	protein kinase C and casein kinase substrate in neurons 2
NEIL1	nei like DNA glycosylase 1
RCBTB1	RCC1 and BTB domain containing protein 1
CELF4	CUGBP Elav-like family member 4
TGDS	TDP-glucose 4,6-dehydratase
WDR20	WD repeat domain 20
LCMT2	leucine carboxyl methyltransferase 2
C2CD5	C2 calcium dependent domain containing 5
PCNX2	pecanex 2
JAKMIP2	janus kinase and microtubule interacting protein 2
ZNF623	zinc finger protein 623
ELMO1	engulfment and cell motility 1
DNAJC1	DnaJ heat shock protein family (Hsp40) member C1
TESPA1	thymocyte expressed, positive selection associated 1
RUSC2	RUN and SH3 domain containing 2
EPM2AIP1	EPM2A interacting protein 1
CDK11A	cyclin dependent kinase 11A
AP3D1	adaptor related protein complex 3 subunit delta 1
SP110	SP110 nuclear body protein
HNRNPAB	heterogeneous nuclear ribonucleoprotein A/B
IDI1	isopentenyl-diphosphate delta isomerase 1
HUS1	HUS1 checkpoint clamp component
FOXA3	forkhead box A3
HSF2	heat shock transcription factor 2
AMPD2	adenosine monophosphate deaminase 2
USP6	ubiquitin specific peptidase 6
AGFG1	ArfGAP with FG repeats 1
MED27	mediator complex subunit 27
UXS1	UDP-glucuronate decarboxylase 1
YME1L1	YME1 like 1 ATPase
MND1	meiotic nuclear divisions 1
ERLIN1	ER lipid raft associated 1
SH2D3C	SH2 domain containing 3C
NBL1	NBL1, DAN family BMP antagonist
AP4B1	adaptor related protein complex 4 subunit beta 1
ZNF821	zinc finger protein 821
PRKCZ-AS1	PRKCZ antisense RNA 1
MORF4L2	mortality factor 4 like 2
SHMT1	serine hydroxymethyltransferase 1
FAAP20	FA core complex associated protein 20
PEX5L	peroxisomal biogenesis factor 5 like
LOC100129534	small nuclear ribonucleoprotein polypeptide N pseudogene
MORN1	MORN repeat containing 1
INSC	INSC spindle orientation adaptor protein
AEBP1	AE binding protein 1
TNF	tumor necrosis factor
PLEK	pleckstrin
MAL	mal, T cell differentiation protein
ADSS	NA
DTYMK	deoxythymidylate kinase
CLCN4	chloride voltage-gated channel 4
GTDC1	glycosyltransferase like domain containing 1
URI1	URI1 prefoldin like chaperone
SLC13A2	solute carrier family 13 member 2
ST18	ST18 C2H2C-type zinc finger transcription factor
TBC1D2B	TBC1 domain family member 2B
NPDC1	neural proliferation, differentiation and control 1
ANAPC13	anaphase promoting complex subunit 13
YIPF3	Yip1 domain family member 3
DYNC1LI2	dynein cytoplasmic 1 light intermediate chain 2
C9orf64	chromosome 9 open reading frame 64
MPZL3	myelin protein zero like 3
BPNT1	3'(2'), 5'-bisphosphate nucleotidase 1
DUSP8	dual specificity phosphatase 8
DUSP2	dual specificity phosphatase 2
BANK1	B cell scaffold protein with ankyrin repeats 1
LRP10	LDL receptor related protein 10
TRDMT1	tRNA aspartic acid methyltransferase 1
DYNC1I1	dynein cytoplasmic 1 intermediate chain 1
DDX11	DEAD/H-box helicase 11
ARHGEF7	Rho guanine nucleotide exchange factor 7
DDX10	DEAD-box helicase 10
IGSF11	immunoglobulin superfamily member 11
DGCR5	DiGeorge syndrome critical region gene 5
RN7SL1	RNA component of signal recognition particle 7SL1
FAM49B	family with sequence similarity 49 member B
DNAJC10	DnaJ heat shock protein family (Hsp40) member C10
NETO1	neuropilin and tolloid like 1
KDM4C	lysine demethylase 4C
ADAM28	ADAM metallopeptidase domain 28
PCYT1B	phosphate cytidylyltransferase 1, choline, beta
EGFL7	EGF like domain multiple 7
ERI1	exoribonuclease 1
DYNC1I2	dynein cytoplasmic 1 intermediate chain 2
NMI	N-myc and STAT interactor
MTMR4	myotubularin related protein 4
ARSG	arylsulfatase G
HTR7	5-hydroxytryptamine receptor 7
HTR6	5-hydroxytryptamine receptor 6
LOC102724450	uncharacterized LOC102724450
PTK2	protein tyrosine kinase 2
PLBD2	phospholipase B domain containing 2
FUT11	fucosyltransferase 11
ZNF596	zinc finger protein 596
GTF2IRD2	GTF2I repeat domain containing 2
CLEC4F	C-type lectin domain family 4 member F
C18orf54	chromosome 18 open reading frame 54
SPIB	Spi-B transcription factor
RFXANK	regulatory factor X associated ankyrin containing protein
CDK13	cyclin dependent kinase 13
SLC1A5	solute carrier family 1 member 5
CCSER1	coiled-coil serine rich protein 1
USP27X	ubiquitin specific peptidase 27 X-linked
SNX20	sorting nexin 20
SF3A3	splicing factor 3a subunit 3
WDR54	WD repeat domain 54
OGFOD1	2-oxoglutarate and iron dependent oxygenase domain containing 1
MAGED1	MAGE family member D1
CAND2	cullin associated and neddylation dissociated 2 (putative)
KDM2A	lysine demethylase 2A
RABL2B	RAB, member of RAS oncogene family like 2B
NR4A3	nuclear receptor subfamily 4 group A member 3
AP4S1	adaptor related protein complex 4 subunit sigma 1
WDR45	WD repeat domain 45
CORO1A	coronin 1A
HHLA2	HERV-H LTR-associating 2
MCRIP2	MAPK regulated corepressor interacting protein 2
SNORC	secondary ossification center associated regulator of chondrocyte maturation
CMC1	C-X9-C motif containing 1
MAPK8	mitogen-activated protein kinase 8
EPB41L5	erythrocyte membrane protein band 4.1 like 5
C15orf54	chromosome 15 open reading frame 54 (putative)
TIMELESS	timeless circadian regulator
LAIR1	leukocyte associated immunoglobulin like receptor 1
BLACAT1	bladder cancer associated transcript 1
HDAC9	histone deacetylase 9
SPHK2	sphingosine kinase 2
DDR1	discoidin domain receptor tyrosine kinase 1
DOCK8	dedicator of cytokinesis 8
SENP1	SUMO specific peptidase 1
FBXW10	F-box and WD repeat domain containing 10
TRIM69	tripartite motif containing 69
STX18	syntaxin 18
ITSN1	intersectin 1
VAX1	ventral anterior homeobox 1
GNE	glucosamine (UDP-N-acetyl)-2-epimerase/N-acetylmannosamine kinase
HCCS	holocytochrome c synthase
SPRED2	sprouty related EVH1 domain containing 2
NDRG2	NDRG family member 2
LOC102724552	NA
SNORD128	small nucleolar RNA, C/D box 128
ABRAXAS1	abraxas 1, BRCA1 A complex subunit
MAPK9	mitogen-activated protein kinase 9
ARID5A	AT-rich interaction domain 5A
MIR6728	microRNA 6728
ENO1-AS1	ENO1 antisense RNA 1
ZNF438	zinc finger protein 438
CACFD1	calcium channel flower domain containing 1
NAP1L4	nucleosome assembly protein 1 like 4
TLR6	toll like receptor 6
AKR1A1	aldo-keto reductase family 1 member A1
ST8SIA5	ST8 alpha-N-acetyl-neuraminide alpha-2,8-sialyltransferase 5
LSR	lipolysis stimulated lipoprotein receptor
ATL1	atlastin GTPase 1
ABHD17B	abhydrolase domain containing 17B
MIR34AHG	MIR34A host gene
LINC01759	NA
EPB41L1	erythrocyte membrane protein band 4.1 like 1
LOC100506022	NA
SCYL2	SCY1 like pseudokinase 2
GOSR2	golgi SNAP receptor complex member 2
PIK3CD-AS1	PIK3CD antisense RNA 1
PIK3CD-AS2	PIK3CD antisense RNA 2
TRAF1	TNF receptor associated factor 1
FAM193B	family with sequence similarity 193 member B
MIA2	MIA SH3 domain ER export factor 2
BCL2L11	BCL2 like 11
ZNF559	zinc finger protein 559
CCNI2	cyclin I family member 2
FGD4	FYVE, RhoGEF and PH domain containing 4
GLYR1	glyoxylate reductase 1 homolog
JAK2	Janus kinase 2
SAP130	Sin3A associated protein 130
RIPPLY3	ripply transcriptional repressor 3
AURKAIP1	aurora kinase A interacting protein 1
CD59	CD59 molecule (CD59 blood group)
LRRC31	leucine rich repeat containing 31
KCNJ15	potassium inwardly rectifying channel subfamily J member 15
GAB2	GRB2 associated binding protein 2
ACTL6A	actin like 6A
SNX24	sorting nexin 24
IL15	interleukin 15
SLC34A1	solute carrier family 34 member 1
CDON	cell adhesion associated, oncogene regulated
CENPS	centromere protein S
CCDC103	coiled-coil domain containing 103
CTNNA3	catenin alpha 3
PPP1R15A	protein phosphatase 1 regulatory subunit 15A
EDC4	enhancer of mRNA decapping 4
RUSC1	RUN and SH3 domain containing 1
BRD7	bromodomain containing 7
HSD11B1L	hydroxysteroid 11-beta dehydrogenase 1 like
USH2A	usherin
LOC105376736	NA
PCMTD1	protein-L-isoaspartate (D-aspartate) O-methyltransferase domain containing 1
TMEM218	transmembrane protein 218
TRAPPC3	trafficking protein particle complex 3
TFPI2	tissue factor pathway inhibitor 2
SLC25A10	solute carrier family 25 member 10
MTOR-AS1	MTOR antisense RNA 1
ALDH1A1	aldehyde dehydrogenase 1 family member A1
CHD1L	chromodomain helicase DNA binding protein 1 like
BAG3	BCL2 associated athanogene 3
SLC25A27	solute carrier family 25 member 27
UCA1	urothelial cancer associated 1
MSTO2P	misato family member 2, pseudogene
EML2	EMAP like 2
SCN1A	sodium voltage-gated channel alpha subunit 1
SERPINB8	serpin family B member 8
NPPA-AS1	NPPA antisense RNA 1
CEP70	centrosomal protein 70
WTAP	WT1 associated protein
USP19	ubiquitin specific peptidase 19
GCDH	glutaryl-CoA dehydrogenase
ELP2	elongator acetyltransferase complex subunit 2
UBE2F	ubiquitin conjugating enzyme E2 F (putative)
GAPVD1	GTPase activating protein and VPS9 domains 1
PSMD1	proteasome 26S subunit, non-ATPase 1
HDAC7	histone deacetylase 7
BEST1	bestrophin 1
UXT	ubiquitously expressed prefoldin like chaperone
UCHL1	ubiquitin C-terminal hydrolase L1
PLSCR4	phospholipid scramblase 4
MIR6730	microRNA 6730
PCID2	PCI domain containing 2
RUVBL1	RuvB like AAA ATPase 1
DUSP23	dual specificity phosphatase 23
TTC13	tetratricopeptide repeat domain 13
LRRN3	leucine rich repeat neuronal 3
MLF1	myeloid leukemia factor 1
PRRC2A	proline rich coiled-coil 2A
APBA2	amyloid beta precursor protein binding family A member 2
CFAP97D1	CFAP97 domain containing 1
UBE2H	ubiquitin conjugating enzyme E2 H
TMEM51	transmembrane protein 51
LENG9	leukocyte receptor cluster member 9
LRRFIP2	LRR binding FLII interacting protein 2
IFNAR2	interferon alpha and beta receptor subunit 2
SFXN5	sideroflexin 5
NAF1	nuclear assembly factor 1 ribonucleoprotein
TEX261	testis expressed 261
L3HYPDH	trans-L-3-hydroxyproline dehydratase
GLMP	glycosylated lysosomal membrane protein
DNAJC16	DnaJ heat shock protein family (Hsp40) member C16
44441	NA
EED	embryonic ectoderm development
PRKN	parkin RBR E3 ubiquitin protein ligase
ENOX2	ecto-NOX disulfide-thiol exchanger 2
STK25	serine/threonine kinase 25
VAT1	vesicle amine transport 1
SYNCRIP	synaptotagmin binding cytoplasmic RNA interacting protein
FLJ37453	uncharacterized LOC729614
AP2M1	adaptor related protein complex 2 subunit mu 1
FBRSL1	fibrosin like 1
KCP	kielin cysteine rich BMP regulator
FLNB	filamin B
TFDP2	transcription factor Dp-2
RAD17	RAD17 checkpoint clamp loader component
TESK1	testis associated actin remodelling kinase 1
MYO18B	myosin XVIIIB
GRB10	growth factor receptor bound protein 10
DDX59	DEAD-box helicase 59
FBXW7	F-box and WD repeat domain containing 7
ARL3	ADP ribosylation factor like GTPase 3
TNFSF14	TNF superfamily member 14
ABCB7	ATP binding cassette subfamily B member 7
RIPK1	receptor interacting serine/threonine kinase 1
PIGA	phosphatidylinositol glycan anchor biosynthesis class A
YIF1A	Yip1 interacting factor homolog A, membrane trafficking protein
WDR4	WD repeat domain 4
NLRP4	NLR family pyrin domain containing 4
CD99L2	CD99 molecule like 2
PPFIBP1	PPFIA binding protein 1
TMEM209	transmembrane protein 209
KLHDC10	kelch domain containing 10
LINC01783	long intergenic non-protein coding RNA 1783
PROM2	prominin 2
CCDC181	coiled-coil domain containing 181
PPP3CB	protein phosphatase 3 catalytic subunit beta
CROCCP2	CROCC pseudogene 2
MST1P2	macrophage stimulating 1 pseudogene 2
ESPNP	espin pseudogene
PKIG	cAMP-dependent protein kinase inhibitor gamma
WDR6	WD repeat domain 6
OSBPL1A	oxysterol binding protein like 1A
LOC105376805	uncharacterized LOC105376805
SBNO2	strawberry notch homolog 2
EBP	EBP cholestenol delta-isomerase
ZNF22	zinc finger protein 22
ZNF182	zinc finger protein 182
KHDRBS3	KH RNA binding domain containing, signal transduction associated 3
DMRT2	doublesex and mab-3 related transcription factor 2
ZNF19	zinc finger protein 19
ZNF17	zinc finger protein 17
KPTN	kaptin, actin binding protein
CAPN11	calpain 11
ZWINT	ZW10 interacting kinetochore protein
KIF2C	kinesin family member 2C
PPARGC1A	PPARG coactivator 1 alpha
TP53I11	tumor protein p53 inducible protein 11
INVS	inversin
ELP1	elongator complex protein 1
LRRC63	leucine rich repeat containing 63
TFG	trafficking from ER to golgi regulator
OPRM1	opioid receptor mu 1
BICD1	BICD cargo adaptor 1
P2RX4	purinergic receptor P2X 4
UBL7-AS1	UBL7 antisense RNA 1 (head to head)
DLGAP1-AS2	DLGAP1 antisense RNA 2
FER1L4	fer-1 like family member 4 (pseudogene)
FUT8	fucosyltransferase 8
APOE	apolipoprotein E
SPATA31C2	SPATA31 subfamily C member 2
RASGRP3	RAS guanyl releasing protein 3
ATP5MC2	ATP synthase membrane subunit c locus 2
ZNF565	zinc finger protein 565
UBAC1	UBA domain containing 1
C20orf194	chromosome 20 open reading frame 194
NOX5	NADPH oxidase 5
ING4	inhibitor of growth family member 4
THAP11	THAP domain containing 11
SPRYD7	SPRY domain containing 7
ADGRG6	adhesion G protein-coupled receptor G6
ATP10D	ATPase phospholipid transporting 10D (putative)
LOC101927895	NA
SEC14L1	SEC14 like lipid binding 1
BSDC1	BSD domain containing 1
AGAP5	ArfGAP with GTPase domain, ankyrin repeat and PH domain 5
ODC1	ornithine decarboxylase 1
AKR7L	aldo-keto reductase family 7 like (gene/pseudogene)
RXRG	retinoid X receptor gamma
LOC100506730	uncharacterized LOC100506730
CAPG	capping actin protein, gelsolin like
MYO1A	myosin IA
CACNA1F	calcium voltage-gated channel subunit alpha1 F
ZNF140	zinc finger protein 140
PQLC2	NA
NLRP2	NLR family pyrin domain containing 2
CXorf40A	chromosome X open reading frame 40A
NCOA4	nuclear receptor coactivator 4
NUDT16	nudix hydrolase 16
ABCG2	ATP binding cassette subfamily G member 2 (Junior blood group)
LOC105378614	uncharacterized LOC105378614
PPP1R18	protein phosphatase 1 regulatory subunit 18
MINOS1	NA
POLR2C	RNA polymerase II subunit C
M1AP	meiosis 1 associated protein
ZFAND2B	zinc finger AN1-type containing 2B
LEO1	LEO1 homolog, Paf1/RNA polymerase II complex component
GALM	galactose mutarotase
PIH1D2	PIH1 domain containing 2
TRIM43	tripartite motif containing 43
TMEM45B	transmembrane protein 45B
LDHAL6A	lactate dehydrogenase A like 6A
NRDC	nardilysin convertase
KLF8	Kruppel like factor 8
FHL1	four and a half LIM domains 1
MAP7	microtubule associated protein 7
PDE4DIP	phosphodiesterase 4D interacting protein
MAGI3	membrane associated guanylate kinase, WW and PDZ domain containing 3
PTK7	protein tyrosine kinase 7 (inactive)
C4orf33	chromosome 4 open reading frame 33
TSHZ2	teashirt zinc finger homeobox 2
PINK1-AS	PINK1 antisense RNA
CENPX	centromere protein X
CDC27	cell division cycle 27
C8orf59	NA
DARS	NA
CHN2	chimerin 2
TMEM14B	transmembrane protein 14B
CACNA1C	calcium voltage-gated channel subunit alpha1 C
PDCD2	programmed cell death 2
BRD2	bromodomain containing 2
LOC100506801	NA
UBAC2	UBA domain containing 2
GSKIP	GSK3B interacting protein
TCF12	transcription factor 12
CLPTM1L	CLPTM1 like
GHDC	GH3 domain containing
PLPP5	phospholipid phosphatase 5
NRBF2	nuclear receptor binding factor 2
S1PR5	sphingosine-1-phosphate receptor 5
TCF7L2	transcription factor 7 like 2
MRPL36	mitochondrial ribosomal protein L36
MRPL38	mitochondrial ribosomal protein L38
MRPL41	mitochondrial ribosomal protein L41
MRPS6	mitochondrial ribosomal protein S6
PKIB	cAMP-dependent protein kinase inhibitor beta
ASPH	aspartate beta-hydroxylase
PRKCQ	protein kinase C theta
GOLGA6L3	golgin A6 family like 3
NPIPB4	nuclear pore complex interacting protein family member B4
KIFC3	kinesin family member C3
BEND6	BEN domain containing 6
MON2	MON2 homolog, regulator of endosome-to-Golgi trafficking
R3HDM2	R3H domain containing 2
MYT1L	myelin transcription factor 1 like
DAPK2	death associated protein kinase 2
XPO7	exportin 7
TGIF1	TGFB induced factor homeobox 1
C9orf43	chromosome 9 open reading frame 43
CRNKL1	crooked neck pre-mRNA splicing factor 1
LINC01635	long intergenic non-protein coding RNA 1635
FUOM	fucose mutarotase
IL16	interleukin 16
PRR18	proline rich 18
CARHSP1	calcium regulated heat stable protein 1
ASNS	asparagine synthetase (glutamine-hydrolyzing)
IL1RL1	interleukin 1 receptor like 1
IL18R1	interleukin 18 receptor 1
RBL2	RB transcriptional corepressor like 2
MAPT	microtubule associated protein tau
RNASEH1	ribonuclease H1
CTSH	cathepsin H
ADSL	adenylosuccinate lyase
NFIL3	nuclear factor, interleukin 3 regulated
NDUFV1	NADH:ubiquinone oxidoreductase core subunit V1
MPDZ	multiple PDZ domain crumbs cell polarity complex component
CADM1	cell adhesion molecule 1
ANKRD2	ankyrin repeat domain 2
TMEM272	transmembrane protein 272
UNKL	unk like zinc finger
OGDHL	oxoglutarate dehydrogenase like
LINC01355	long intergenic non-protein coding RNA 1355
TP73	tumor protein p73
TMBIM6	transmembrane BAX inhibitor motif containing 6
MYB	MYB proto-oncogene, transcription factor
CXCR2	C-X-C motif chemokine receptor 2
SCG3	secretogranin III
CREM	cAMP responsive element modulator
PLA2G6	phospholipase A2 group VI
ZNF436-AS1	ZNF436 antisense RNA 1
INPP5J	inositol polyphosphate-5-phosphatase J
HACE1	HECT domain and ankyrin repeat containing E3 ubiquitin protein ligase 1
TOB1	transducer of ERBB2, 1
TRA2B	transformer 2 beta homolog
KIAA0586	KIAA0586
ELOA-AS1	ELOA antisense RNA 1
ETV2	ETS variant transcription factor 2
FAM98A	family with sequence similarity 98 member A
EPHA4	EPH receptor A4
RABL2A	RAB, member of RAS oncogene family like 2A
SMUG1	single-strand-selective monofunctional uracil-DNA glycosylase 1
CAMK2D	calcium/calmodulin dependent protein kinase II delta
KRBOX4	KRAB box domain containing 4
SYCE1	synaptonemal complex central element protein 1
SYNRG	synergin gamma
CHRDL2	chordin like 2
RIMS2	regulating synaptic membrane exocytosis 2
PIGX	phosphatidylinositol glycan anchor biosynthesis class X
C1orf56	chromosome 1 open reading frame 56
TIPIN	TIMELESS interacting protein
SSH3	slingshot protein phosphatase 3
GEMIN8	gem nuclear organelle associated protein 8
TMEM160	transmembrane protein 160
BTG3	BTG anti-proliferation factor 3
EHD1	EH domain containing 1
HNRNPA0	heterogeneous nuclear ribonucleoprotein A0
GPR75	G protein-coupled receptor 75
TADA3	transcriptional adaptor 3
AP3M2	adaptor related protein complex 3 subunit mu 2
RIBC2	RIB43A domain with coiled-coils 2
KDELR1	KDEL endoplasmic reticulum protein retention receptor 1
MORF4L1	mortality factor 4 like 1
SENP6	SUMO specific peptidase 6
HERC4	HECT and RLD domain containing E3 ubiquitin protein ligase 4
SNAP29	synaptosome associated protein 29
TCEAL1	transcription elongation factor A like 1
CNOT8	CCR4-NOT transcription complex subunit 8
CEBPA	CCAAT enhancer binding protein alpha
CEACAM5	CEA cell adhesion molecule 5
B4GALT6	beta-1,4-galactosyltransferase 6
RUNX3	RUNX family transcription factor 3
CASP3	caspase 3
CNKSR1	connector enhancer of kinase suppressor of Ras 1
TBX20	T-box transcription factor 20
NEK6	NIMA related kinase 6
ANKMY1	ankyrin repeat and MYND domain containing 1
ABHD10	abhydrolase domain containing 10
SLC35C2	solute carrier family 35 member C2
NRF1	nuclear respiratory factor 1
MIR6731	microRNA 6731
MIR4425	microRNA 4425
PLIN1	perilipin 1
POLR2I	RNA polymerase II subunit I
RSRP1	arginine and serine rich protein 1
C3orf52	chromosome 3 open reading frame 52
TBC1D15	TBC1 domain family member 15
PODNL1	podocan like 1
TSC1	TSC complex subunit 1
CYSLTR1	cysteinyl leukotriene receptor 1
PDXDC1	pyridoxal dependent decarboxylase domain containing 1
ABLIM1	actin binding LIM protein 1
VPS50	VPS50 subunit of EARP/GARPII complex
MRPL52	mitochondrial ribosomal protein L52
IL21R	interleukin 21 receptor
LOC646471	uncharacterized LOC646471
FN1	fibronectin 1
AIMP1	aminoacyl tRNA synthetase complex interacting multifunctional protein 1
MRVI1	murine retrovirus integration site 1 homolog
TARS2	threonyl-tRNA synthetase 2, mitochondrial
SLFN5	schlafen family member 5
KRT10	keratin 10
ITGA2B	integrin subunit alpha 2b
LOC101928303	NA
NUP210L	nucleoporin 210 like
MBNL1	muscleblind like splicing regulator 1
KIF5C	kinesin family member 5C
STOX1	storkhead box 1
TBC1D17	TBC1 domain family member 17
DYNC2H1	dynein cytoplasmic 2 heavy chain 1
NFATC1	nuclear factor of activated T cells 1
LOC101928324	NA
SEMA4F	ssemaphorin 4F
ZNF138	zinc finger protein 138
AZI2	5-azacytidine induced 2
THADA	THADA armadillo repeat containing
LOC101928728	uncharacterized LOC101928728
KLK10	kallikrein related peptidase 10
C2orf81	chromosome 2 open reading frame 81
PHYH	phytanoyl-CoA 2-hydroxylase
AFAP1L2	actin filament associated protein 1 like 2
DCLRE1C	DNA cross-link repair 1C
ROBO3	roundabout guidance receptor 3
DTNB	dystrobrevin beta
MAP3K9	mitogen-activated protein kinase kinase kinase 9
CALD1	caldesmon 1
ACTG1P20	actin gamma 1 pseudogene 20
TOM1	target of myb1 membrane trafficking protein
AGBL3	ATP/GTP binding protein like 3
WDR27	WD repeat domain 27
BIRC5	baculoviral IAP repeat containing 5
RGS14	regulator of G protein signaling 14
GAS2L1	growth arrest specific 2 like 1
RASL10A	RAS like family 10 member A
RBM12	RNA binding motif protein 12
MT1A	metallothionein 1A
CD200	CD200 molecule
HDAC6	histone deacetylase 6
TAF6L	TATA-box binding protein associated factor 6 like
MYL12A	myosin light chain 12A
IVNS1ABP	influenza virus NS1A binding protein
POLR3C	RNA polymerase III subunit C
POLR3F	RNA polymerase III subunit F
ARID3B	AT-rich interaction domain 3B
GRAMD4	GRAM domain containing 4
FRMD4B	FERM domain containing 4B
SCARNA1	small Cajal body-specific RNA 1
MMP2	matrix metallopeptidase 2
C15orf40	chromosome 15 open reading frame 40
SLC12A9	solute carrier family 12 member 9
RXRB	retinoid X receptor beta
HAVCR1	hepatitis A virus cellular receptor 1
C12orf57	chromosome 12 open reading frame 57
PISD	phosphatidylserine decarboxylase
EYA3	EYA transcriptional coactivator and phosphatase 3
TOR1AIP2	torsin 1A interacting protein 2
DTNA	dystrobrevin alpha
SEC22C	SEC22 homolog C, vesicle trafficking protein
C7orf50	chromosome 7 open reading frame 50
SNHG3	small nucleolar RNA host gene 3
INTS10	integrator complex subunit 10
SNORA73B	small nucleolar RNA, H/ACA box 73B
KIF27	kinesin family member 27
LMBRD1	LMBR1 domain containing 1
C12orf4	chromosome 12 open reading frame 4
EDA2R	ectodysplasin A2 receptor
SNORD99	small nucleolar RNA, C/D box 99
SNORA44	small nucleolar RNA, H/ACA box 44
SNORA16A	small nucleolar RNA, H/ACA box 16A
GTF2H4	general transcription factor IIH subunit 4
LINC01715	long intergenic non-protein coding RNA 1715
KPNA2	karyopherin subunit alpha 2
B3GALNT1	beta-1,3-N-acetylgalactosaminyltransferase 1 (globoside blood group)
ICAM3	intercellular adhesion molecule 3
APOBEC3C	apolipoprotein B mRNA editing enzyme catalytic subunit 3C
BAG6	BCL2 associated athanogene 6
PTBP3	polypyrimidine tract binding protein 3
ITPA	inosine triphosphatase
CNNM1	cyclin and CBS domain divalent metal cation transport mediator 1
VWA3B	von Willebrand factor A domain containing 3B
KIF13A	kinesin family member 13A
MIR4420	microRNA 4420
DGLUCY	D-glutamate cyclase
ARMT1	acidic residue methyltransferase 1
THBS4	thrombospondin 4
PCDHGB6	protocadherin gamma subfamily B, 6
SNORD103C	small nucleolar RNA, C/D box 103C
GGA3	golgi associated, gamma adaptin ear containing, ARF binding protein 3
MYO6	myosin VI
NR2C2AP	nuclear receptor 2C2 associated protein
CD36	CD36 molecule
ZNF174	zinc finger protein 174
ZNF169	zinc finger protein 169
ZNF165	zinc finger protein 165
ZNF157	zinc finger protein 157
CNTN5	contactin 5
NKX2-8	NK2 homeobox 8
PITPNM3	PITPNM family member 3
SNCA	synuclein alpha
SNX13	sorting nexin 13
PCNX3	pecanex 3
MINDY4	MINDY lysine 48 deubiquitinase 4
MIR5585	microRNA 5585
PTTG1	PTTG1 regulator of sister chromatid separation, securin
HLA-A	major histocompatibility complex, class I, A
TMEM234	transmembrane protein 234
FGF1	fibroblast growth factor 1
GPD1	glycerol-3-phosphate dehydrogenase 1
MTMR9LP	myotubularin related protein 9 like, pseudogene
PFKP	phosphofructokinase, platelet
RPLP0	ribosomal protein lateral stalk subunit P0
HMBOX1	homeobox containing 1
ACBD4	acyl-CoA binding domain containing 4
HNF1B	HNF1 homeobox B
SLC26A5	solute carrier family 26 member 5
SLC4A10	solute carrier family 4 member 10
CDC45	cell division cycle 45
ATG7	autophagy related 7
RNASEH2A	ribonuclease H2 subunit A
TFF1	trefoil factor 1
TFAP4	transcription factor AP-4
PPP2R1B	protein phosphatase 2 scaffold subunit Abeta
PPP2CA	protein phosphatase 2 catalytic subunit alpha
TEF	TEF transcription factor, PAR bZIP family member
PPP1CC	protein phosphatase 1 catalytic subunit gamma
S100PBP	S100P binding protein
ANKS1B	ankyrin repeat and sterile alpha motif domain containing 1B
ACACB	acetyl-CoA carboxylase beta
ITCH	itchy E3 ubiquitin protein ligase
WAS	WASP actin nucleation promoting factor
VDR	vitamin D receptor
UROD	uroporphyrinogen decarboxylase
TSHR	thyroid stimulating hormone receptor
MARCKSL1	MARCKS like 1
DRAM2	DNA damage regulated autophagy modulator 2
RASAL1	RAS protein activator like 1
PPP1R3B	protein phosphatase 1 regulatory subunit 3B
TOR2A	torsin family 2 member A
ALAD	aminolevulinate dehydratase
SLC12A7	solute carrier family 12 member 7
LMBR1L	limb development membrane protein 1 like
ZNF415	zinc finger protein 415
HNRNPM	heterogeneous nuclear ribonucleoprotein M
TUBAL3	tubulin alpha like 3
FAM57A	NA
PDZD3	PDZ domain containing 3
CDC14A	cell division cycle 14A
B3GNT9	UDP-GlcNAc:betaGal beta-1,3-N-acetylglucosaminyltransferase 9
LOC653160	uncharacterized LOC653160
TMEM35B	transmembrane protein 35B
EXO1	exonuclease 1
CAMKK2	calcium/calmodulin dependent protein kinase kinase 2
ARNTL	aryl hydrocarbon receptor nuclear translocator like
ZNF888	zinc finger protein 888
BHMG1	basic helix-loop-helix and HMG-box containing 1
UCK1	uridine-cytidine kinase 1
GIMAP2	GTPase, IMAP family member 2
NOC2L	NOC2 like nucleolar associated transcriptional repressor
JMJD6	jumonji domain containing 6, arginine demethylase and lysine hydroxylase
TRIM9	tripartite motif containing 9
ARL6IP1	ADP ribosylation factor like GTPase 6 interacting protein 1
KANK1	KN motif and ankyrin repeat domains 1
MESD	mesoderm development LRP chaperone
SIDT1	SID1 transmembrane family member 1
AGO4	argonaute RISC component 4
TMEM126B	transmembrane protein 126B
LAG3	lymphocyte activating 3
KRT83	keratin 83
NSD2	nuclear receptor binding SET domain protein 2
VCAM1	vascular cell adhesion molecule 1
UBA52	ubiquitin A-52 residue ribosomal protein fusion product 1
EVA1B	eva-1 homolog B
SRF	serum response factor
KLF13	Kruppel like factor 13
CAMK4	calcium/calmodulin dependent protein kinase IV
SNRPN	small nuclear ribonucleoprotein polypeptide N
FLRT1	fibronectin leucine rich transmembrane protein 1
RACGAP1	Rac GTPase activating protein 1
PLPPR3	phospholipid phosphatase related 3
L1CAM	L1 cell adhesion molecule
GAS2	growth arrest specific 2
RPL6	ribosomal protein L6
DPP8	dipeptidyl peptidase 8
MIR5581	microRNA 5581
NEPRO	nucleolus and neural progenitor protein
JAK1	Janus kinase 1
TANGO2	transport and golgi organization 2 homolog
ACER3	alkaline ceramidase 3
RTN4	reticulon 4
PCDH9	protocadherin 9
AACS	acetoacetyl-CoA synthetase
DMAC2	distal membrane arm assembly complex 2
DUSP13	dual specificity phosphatase 13
CAPRIN2	caprin family member 2
TMEM183B	transmembrane protein 183B
ZER1	zyg-11 related cell cycle regulator
GDI2	GDP dissociation inhibitor 2
ELK4	ETS transcription factor ELK4
DDX20	DEAD-box helicase 20
AKAP10	A-kinase anchoring protein 10
A4GALT	alpha 1,4-galactosyltransferase (P blood group)
SALL4	spalt like transcription factor 4
TAOK3	TAO kinase 3
MYCBP	MYC binding protein
LOC105378663	uncharacterized LOC105378663
CCDC138	coiled-coil domain containing 138
ARMCX2	armadillo repeat containing X-linked 2
SLC25A14	solute carrier family 25 member 14
SLC29A1	solute carrier family 29 member 1 (Augustine blood group)
KIAA0754	KIAA0754
TRPM2	transient receptor potential cation channel subfamily M member 2
OXCT2P1	3-oxoacid CoA-transferase 2 pseudogene 1
PPIEL	peptidylprolyl isomerase E like pseudogene
KARS	NA
ARRB2	arrestin beta 2
LOC101929516	NA
C10orf128	NA
TRIR	telomerase RNA component interacting RNase
PCM1	pericentriolar material 1
PAWR	pro-apoptotic WT1 regulator
MTMR1	myotubularin related protein 1
MTRF1	mitochondrial translation release factor 1
GPRC5B	G protein-coupled receptor class C group 5 member B
LOC101929536	uncharacterized LOC101929536
BCAR1	BCAR1 scaffold protein, Cas family member
ZNF345	zinc finger protein 345
LINC00640	long intergenic non-protein coding RNA 640
MLH1	mutL homolog 1
LINC00487	long intergenic non-protein coding RNA 487
LINC00837	long intergenic non-protein coding RNA 837
DCAF11	DDB1 and CUL4 associated factor 11
ZRANB2-AS1	ZRANB2 antisense RNA 1
LINC00941	long intergenic non-protein coding RNA 941
MKNK1-AS1	MKNK1 antisense RNA 1
LINC00886	long intergenic non-protein coding RNA 886
LINC00865	long intergenic non-protein coding RNA 865
TSC22D1-AS1	TSC22D1 antisense RNA 1
BCL2L12	BCL2 like 12
RPL34	ribosomal protein L34
KIAA0040	KIAA0040
ALG9	ALG9 alpha-1,2-mannosyltransferase
PGAP3	post-GPI attachment to proteins phospholipase 3
ZNF112	zinc finger protein 112
PDE1B	phosphodiesterase 1B
PPM1L	protein phosphatase, Mg2+/Mn2+ dependent 1L
ITGA6	integrin subunit alpha 6
VWF	von Willebrand factor
DNPEP	aspartyl aminopeptidase
MPP2	membrane palmitoylated protein 2
POLDIP2	DNA polymerase delta interacting protein 2
COLGALT1	collagen beta(1-O)galactosyltransferase 1
LSM14A	LSM14A mRNA processing body assembly factor
RAI14	retinoic acid induced 14
ARID4A	AT-rich interaction domain 4A
TMEM41B	transmembrane protein 41B
ZNF517	zinc finger protein 517
SIPA1L1	signal induced proliferation associated 1 like 1
SLFNL1-AS1	SLFNL1 antisense RNA 1
COG5	component of oligomeric golgi complex 5
HKR1	NA
DNAJA4	DnaJ heat shock protein family (Hsp40) member A4
VAV2	vav guanine nucleotide exchange factor 2
ADGRF3	adhesion G protein-coupled receptor F3
DDAH1	dimethylarginine dimethylaminohydrolase 1
CNTN6	contactin 6
NUP62	nucleoporin 62
RCHY1	ring finger and CHY zinc finger domain containing 1
ATG13	autophagy related 13
RFXAP	regulatory factor X associated protein
USP28	ubiquitin specific peptidase 28
GLE1	GLE1 RNA export mediator
ENPEP	glutamyl aminopeptidase
GNS	glucosamine (N-acetyl)-6-sulfatase
ENO3	enolase 3
GCLC	glutamate-cysteine ligase catalytic subunit
B4GALT1	beta-1,4-galactosyltransferase 1
GFRA2	GDNF family receptor alpha 2
MIR4446	microRNA 4446
STAG3L2	stromal antigen 3-like 2 (pseudogene)
LINC00266-1	long intergenic non-protein coding RNA 266-1
ANKS3	ankyrin repeat and sterile alpha motif domain containing 3
ZNF410	zinc finger protein 410
WWTR1-AS1	WWTR1 antisense RNA 1
SPNS1	sphingolipid transporter 1 (putative)
FAM156A	family with sequence similarity 156 member A
C16orf72	chromosome 16 open reading frame 72
DNAJB9	DnaJ heat shock protein family (Hsp40) member B9
ATAD2	ATPase family AAA domain containing 2
LOC339539	uncharacterized LOC339539
MUC20	mucin 20, cell surface associated
GSK3A	glycogen synthase kinase 3 alpha
MYH7B	myosin heavy chain 7B
CDV3	CDV3 homolog
GAS7	growth arrest specific 7
IL31RA	interleukin 31 receptor A
GFOD1	glucose-fructose oxidoreductase domain containing 1
CMPK1	cytidine/uridine monophosphate kinase 1
APH1A	aph-1 homolog A, gamma-secretase subunit
MED8	mediator complex subunit 8
KIF5B	kinesin family member 5B
KIF2A	kinesin family member 2A
POLR2K	RNA polymerase II subunit K
SZT2-AS1	SZT2 antisense RNA 1
DHRS1	dehydrogenase/reductase 1
ZNF600	zinc finger protein 600
IZUMO1	izumo sperm-egg fusion 1
KDM4A-AS1	KDM4A antisense RNA 1
CHODL	chondrolectin
YY1AP1	YY1 associated protein 1
XPO1	exportin 1
TATDN1	TatD DNase domain containing 1
BCAS1	breast carcinoma amplified sequence 1
MTBP	MDM2 binding protein
ATPAF1	ATP synthase mitochondrial F1 complex assembly factor 1
C16orf58	chromosome 16 open reading frame 58
GABBR1	gamma-aminobutyric acid type B receptor subunit 1
NSD1	nuclear receptor binding SET domain protein 1
NDUFS7	NADH:ubiquinone oxidoreductase core subunit S7
DCTN3	dynactin subunit 3
DCAF10	DDB1 and CUL4 associated factor 10
ASCC2	activating signal cointegrator 1 complex subunit 2
MXI1	MAX interactor 1, dimerization protein
SLC26A7	solute carrier family 26 member 7
RGS3	regulator of G protein signaling 3
TNFRSF18	TNF receptor superfamily member 18
WFDC2	WAP four-disulfide core domain 2
TTC39B	tetratricopeptide repeat domain 39B
RASGEF1A	RasGEF domain family member 1A
TAMM41	TAM41 mitochondrial translocator assembly and maintenance homolog
CCDC24	coiled-coil domain containing 24
METTL4	methyltransferase like 4
DLGAP1	DLG associated protein 1
CPNE9	copine family member 9
EDF1	endothelial differentiation related factor 1
TBCC	tubulin folding cofactor C
TCF7	transcription factor 7
SLC8A3	solute carrier family 8 member A3
ANTXR2	ANTXR cell adhesion molecule 2
OLFM3	olfactomedin 3
UBE2J2	ubiquitin conjugating enzyme E2 J2
TSR2	TSR2 ribosome maturation factor
RPL13	ribosomal protein L13
PML	promyelocytic leukemia
NAA15	N(alpha)-acetyltransferase 15, NatA auxiliary subunit
PEX16	peroxisomal biogenesis factor 16
ERI3-IT1	ERI3 intronic transcript 1
SNORA110	small nucleolar RNA, H/ACA box 110
SRPX	sushi repeat containing protein X-linked
PNISR	PNN interacting serine and arginine rich protein
SURF2	surfeit 2
GANAB	glucosidase II alpha subunit
CFAP298	cilia and flagella associated protein 298
SNORD145	small nucleolar RNA, C/D box 145
PDGFRA	platelet derived growth factor receptor alpha
ME3	malic enzyme 3
RUBCN	rubicon autophagy regulator
KIAA0355	KIAA0355
SNORD55	small nucleolar RNA, C/D box 55
SNORD46	small nucleolar RNA, C/D box 46
SNORD38A	small nucleolar RNA, C/D box 38A
SNORD38B	small nucleolar RNA, C/D box 38B
STS	steroid sulfatase
ZNF133	zinc finger protein 133
KIAA0391	NA
SMG6	SMG6 nonsense mediated mRNA decay factor
PAX2	paired box 2
ARIH2	ariadne RBR E3 ubiquitin protein ligase 2
MTMR14	myotubularin related protein 14
TMEM168	transmembrane protein 168
TMEM267	transmembrane protein 267
ARAP3	ArfGAP with RhoGAP domain, ankyrin repeat and PH domain 3
KLHL25	kelch like family member 25
CDH24	cadherin 24
ZNF350	zinc finger protein 350
GNB4	G protein subunit beta 4
TAF1	TATA-box binding protein associated factor 1
GRM2	glutamate metabotropic receptor 2
PRPF4	pre-mRNA processing factor 4
DHX8	DEAH-box helicase 8
TPM1	tropomyosin 1
NME4	NME/NM23 nucleoside diphosphate kinase 4
NPFF	neuropeptide FF-amide peptide precursor
RTCA	RNA 3'-terminal phosphate cyclase
HLA-G	major histocompatibility complex, class I, G
SKAP1	src kinase associated phosphoprotein 1
SPTA1	spectrin alpha, erythrocytic 1
PSMG1	proteasome assembly chaperone 1
AK2	adenylate kinase 2
AZIN1	antizyme inhibitor 1
VILL	villin like
ZNF593	zinc finger protein 593
VPS13B	vacuolar protein sorting 13 homolog B
CBLB	Cbl proto-oncogene B
LTBP3	latent transforming growth factor beta binding protein 3
PLCH2	phospholipase C eta 2
ITPRIP	inositol 1,4,5-trisphosphate receptor interacting protein
MOK	MOK protein kinase
PDPR	pyruvate dehydrogenase phosphatase regulatory subunit
NUDT12	nudix hydrolase 12
MAGOHB	mago homolog B, exon junction complex subunit
PARPBP	PARP1 binding protein
NSUN4	NOP2/Sun RNA methyltransferase 4
ANKRD6	ankyrin repeat domain 6
POU6F1	POU class 6 homeobox 1
THRB	thyroid hormone receptor beta
CD101	CD101 molecule
YWHAQ	tyrosine 3-monooxygenase/tryptophan 5-monooxygenase activation protein theta
EBNA1BP2	EBNA1 binding protein 2
CYB5R3	cytochrome b5 reductase 3
ATG4D	autophagy related 4D cysteine peptidase
ZNF184	zinc finger protein 184
PITRM1	pitrilysin metallopeptidase 1
SLC35E1	solute carrier family 35 member E1
CNTD2	cyclin N-terminal domain containing 2
FGFR1	fibroblast growth factor receptor 1
SYNPO2L	synaptopodin 2 like
TNIP3	TNFAIP3 interacting protein 3
FHIT	fragile histidine triad diadenosine triphosphatase
PFKFB1	6-phosphofructo-2-kinase/fructose-2,6-biphosphatase 1
POLD1	DNA polymerase delta 1, catalytic subunit
APC	APC regulator of WNT signaling pathway
LINC00441	NA
AKR1E2	aldo-keto reductase family 1 member E2
MEG3	maternally expressed 3
PSD	pleckstrin and Sec7 domain containing
RNF8	ring finger protein 8
CD274	CD274 molecule
C17orf80	chromosome 17 open reading frame 80
SNX17	sorting nexin 17
WDR13	WD repeat domain 13
KRT85	keratin 85
LINC01389	long intergenic non-protein coding RNA 1389
PLA2G4A	phospholipase A2 group IVA
PUS1	pseudouridine synthase 1
KCNQ5	potassium voltage-gated channel subfamily Q member 5
MKRN1	makorin ring finger protein 1
DIS3L	DIS3 like exosome 3'-5' exoribonuclease
SNAP47	synaptosome associated protein 47
FOPNL	FGFR1OP N-terminal like
UROS	uroporphyrinogen III synthase
MAP3K14-AS1	MAP3K14 antisense RNA 1
UPP1	uridine phosphorylase 1
KIAA1191	KIAA1191
DMXL2	Dmx like 2
ZFYVE27	zinc finger FYVE-type containing 27
VEZT	vezatin, adherens junctions transmembrane protein
ADPRH	ADP-ribosylarginine hydrolase
PDK1	pyruvate dehydrogenase kinase 1
LINC01562	long intergenic non-protein coding RNA 1562
TRMT112	tRNA methyltransferase subunit 11-2
UBXN1	UBX domain protein 1
RPA2	replication protein A2
ATP2A1	ATPase sarcoplasmic/endoplasmic reticulum Ca2+ transporting 1
MOV10	Mov10 RISC complex RNA helicase
FLVCR1-AS1	NA
SAE1	SUMO1 activating enzyme subunit 1
SRRM2-AS1	SRRM2 antisense RNA 1
PRDM10	PR/SET domain 10
C2orf27A	chromosome 2 open reading frame 27A
PRCP	prolylcarboxypeptidase
UBOX5	U-box domain containing 5
PRC1	protein regulator of cytokinesis 1
EHMT1	euchromatic histone lysine methyltransferase 1
UBE3A	ubiquitin protein ligase E3A
TRPC4AP	transient receptor potential cation channel subfamily C member 4 associated protein
HDAC2	histone deacetylase 2
ARL13B	ADP ribosylation factor like GTPase 13B
AMZ2	archaelysin family metallopeptidase 2
RBM15	RNA binding motif protein 15
AEN	apoptosis enhancing nuclease
CERK	ceramide kinase
MTHFSD	methenyltetrahydrofolate synthetase domain containing
FNDC3B	fibronectin type III domain containing 3B
RMND5B	required for meiotic nuclear division 5 homolog B
C11orf1	chromosome 11 open reading frame 1
PCED1A	PC-esterase domain containing 1A
C6orf106	NA
DISC1	DISC1 scaffold protein
STAT4	signal transducer and activator of transcription 4
CACNA1B	calcium voltage-gated channel subunit alpha1 B
VARS2	valyl-tRNA synthetase 2, mitochondrial
PATZ1	POZ/BTB and AT hook containing zinc finger 1
POMT1	protein O-mannosyltransferase 1
R3HCC1L	R3H domain and coiled-coil containing 1 like
MAP3K7	mitogen-activated protein kinase kinase kinase 7
DNAH14	dynein axonemal heavy chain 14
IGFBP2	insulin like growth factor binding protein 2
RCBTB2	RCC1 and BTB domain containing protein 2
SHISAL2A	shisa like 2A
TSGA10	testis specific 10
WRB	NA
EPB41L2	erythrocyte membrane protein band 4.1 like 2
SLC9A5	solute carrier family 9 member A5
AZIN2	antizyme inhibitor 2
FAM131B	family with sequence similarity 131 member B
TMEM177	transmembrane protein 177
BAG1	BCL2 associated athanogene 1
IL1A	interleukin 1 alpha
RPL19	ribosomal protein L19
HBG1	hemoglobin subunit gamma 1
GDF5	growth differentiation factor 5
SLC1A7	solute carrier family 1 member 7
IDH3B	isocitrate dehydrogenase (NAD(+)) 3 non-catalytic subunit beta
KDM6A	lysine demethylase 6A
LINC01260	long intergenic non-protein coding RNA 1260
LOC100507564	uncharacterized LOC100507564
CAPN14	calpain 14
LINC01771	long intergenic non-protein coding RNA 1771
XPNPEP1	X-prolyl aminopeptidase 1
TNRC6A	trinucleotide repeat containing adaptor 6A
NDC1	NDC1 transmembrane nucleoporin
YIPF1	Yip1 domain family member 1
NR2F1-AS1	NR2F1 antisense RNA 1
HSPB11	heat shock protein family B (small) member 11
CLCN2	chloride voltage-gated channel 2
PGPEP1	pyroglutamyl-peptidase I
SLC30A6	solute carrier family 30 member 6
NOS1AP	nitric oxide synthase 1 adaptor protein
NAGLU	N-acetyl-alpha-glucosaminidase
TCEANC2	transcription elongation factor A N-terminal and central domain containing 2
NAT9	N-acetyltransferase 9 (putative)
RPS6KC1	ribosomal protein S6 kinase C1
RTEL1	regulator of telomere elongation helicase 1
SPEF2	sperm flagellar 2
RNF145	ring finger protein 145
ZMAT2	zinc finger matrin-type 2
NOC4L	nucleolar complex associated 4 homolog
SLC30A5	solute carrier family 30 member 5
TMEM106C	transmembrane protein 106C
XYLT2	xylosyltransferase 2
ALG8	ALG8 alpha-1,3-glucosyltransferase
C17orf75	chromosome 17 open reading frame 75
UBL5	ubiquitin like 5
ABCG4	ATP binding cassette subfamily G member 4
KDELC1	NA
WDR18	WD repeat domain 18
ASB9	ankyrin repeat and SOCS box containing 9
IFIH1	interferon induced with helicase C domain 1
ASPSCR1	ASPSCR1 tether for SLC2A4, UBX domain containing
PRRG4	proline rich and Gla domain 4
NOD2	nucleotide binding oligomerization domain containing 2
TTLL6	tubulin tyrosine ligase like 6
HEXDC	NA
INO80E	INO80 complex subunit E
VWA3A	von Willebrand factor A domain containing 3A
LOC100507634	uncharacterized LOC100507634
CUL2	cullin 2
C8orf58	chromosome 8 open reading frame 58
FAM107B	family with sequence similarity 107 member B
PAX6	paired box 6
PXK	PX domain containing serine/threonine kinase like
RAP1GAP	RAP1 GTPase activating protein
DNMT3A	DNA methyltransferase 3 alpha
IKBKE	inhibitor of nuclear factor kappa B kinase subunit epsilon
MRPS18A	mitochondrial ribosomal protein S18A
FCMR	Fc fragment of IgM receptor
TMEM182	transmembrane protein 182
ZNF513	zinc finger protein 513
RFTN2	raftlin family member 2
TSACC	TSSK6 activating cochaperone
RIOX2	ribosomal oxygenase 2
WDR64	WD repeat domain 64
ZGPAT	zinc finger CCCH-type and G-patch domain containing
NT5C1A	5'-nucleotidase, cytosolic IA
GABPB2	GA binding protein transcription factor subunit beta 2
LOC101926944	uncharacterized LOC101926944
MYADM	myeloid associated differentiation marker
ZNF302	zinc finger protein 302
PRPF40A	pre-mRNA processing factor 40 homolog A
CPA5	carboxypeptidase A5
MED21	mediator complex subunit 21
POLI	DNA polymerase iota
TM2D1	TM2 domain containing 1
PLRG1	pleiotropic regulator 1
CA6	carbonic anhydrase 6
TSPO	translocator protein
PSMA6	proteasome 20S subunit alpha 6
TNFSF13B	TNF superfamily member 13b
B4GALT2	beta-1,4-galactosyltransferase 2
B4GALT3	beta-1,4-galactosyltransferase 3
B4GALT4	beta-1,4-galactosyltransferase 4
MRPL40	mitochondrial ribosomal protein L40
GALNT4	polypeptide N-acetylgalactosaminyltransferase 4
HYAL2	hyaluronidase 2
JRKL	JRK like
SRSF9	serine and arginine rich splicing factor 9
SYK	spleen associated tyrosine kinase
STX10	syntaxin 10
SUV39H1	suppressor of variegation 3-9 homolog 1
STXBP1	syntaxin binding protein 1
VAMP8	vesicle associated membrane protein 8
RPS6KB1	ribosomal protein S6 kinase B1
EIF4G3	eukaryotic translation initiation factor 4 gamma 3
PGLYRP4	peptidoglycan recognition protein 4
CHRNA10	cholinergic receptor nicotinic alpha 10 subunit
NUP107	nucleoporin 107
LPAR5	lysophosphatidic acid receptor 5
GSDMB	gasdermin B
PBK	PDZ binding kinase
LINC00623	long intergenic non-protein coding RNA 623
KMT2E-AS1	KMT2E antisense RNA 1
SUPT7L	SPT7 like, STAGA complex gamma subunit
PXYLP1	2-phosphoxylose phosphatase 1
SLC25A17	solute carrier family 25 member 17
ITGB3BP	integrin subunit beta 3 binding protein
SP140L	SP140 nuclear body protein like
TPRA1	transmembrane protein adipocyte associated 1
TRAT1	T cell receptor associated transmembrane adaptor 1
TLX2	T cell leukemia homeobox 2
ICOSLG	inducible T cell costimulator ligand
GPRIN2	G protein regulated inducer of neurite outgrowth 2
CCDC144A	coiled-coil domain containing 144A
DOCK4	dedicator of cytokinesis 4
PIGN	phosphatidylinositol glycan anchor biosynthesis class N
PPP1R8	protein phosphatase 1 regulatory subunit 8
ZNF770	zinc finger protein 770
SLC43A3	solute carrier family 43 member 3
RAB5A	RAB5A, member RAS oncogene family
NMU	neuromedin U
HCLS1	hematopoietic cell-specific Lyn substrate 1
MTR	5-methyltetrahydrofolate-homocysteine methyltransferase
TMED4	transmembrane p24 trafficking protein 4
U2SURP	U2 snRNP associated SURP domain containing
TAB2	TGF-beta activated kinase 1 (MAP3K7) binding protein 2
LINC01359	long intergenic non-protein coding RNA 1359
FAHD1	fumarylacetoacetate hydrolase domain containing 1
SUCO	SUN domain containing ossification factor
TLE4	TLE family member 4, transcriptional corepressor
SPRY3	sprouty RTK signaling antagonist 3
DIS3	DIS3 homolog, exosome endoribonuclease and 3'-5' exoribonuclease
COMMD9	COMM domain containing 9
USP4	ubiquitin specific peptidase 4
TRPC1	transient receptor potential cation channel subfamily C member 1
LUC7L2	LUC7 like 2, pre-mRNA splicing factor
TFEC	transcription factor EC
AFAP1L1	actin filament associated protein 1 like 1
C1orf198	chromosome 1 open reading frame 198
QPCTL	glutaminyl-peptide cyclotransferase like
EWSR1	EWS RNA binding protein 1
LYRM4	LYR motif containing 4
AKR1C3	aldo-keto reductase family 1 member C3
FAM69A	NA
FOSB	FosB proto-oncogene, AP-1 transcription factor subunit
EPB42	erythrocyte membrane protein band 4.2
CTNNA2	catenin alpha 2
ALDH2	aldehyde dehydrogenase 2 family member
MR1	major histocompatibility complex, class I-related
SOD2	superoxide dismutase 2
MAP1S	microtubule associated protein 1S
PLEKHG6	pleckstrin homology and RhoGEF domain containing G6
FAM86C1	family with sequence similarity 86 member C1
KIAA1551	NA
RPRD1A	regulation of nuclear pre-mRNA domain containing 1A
STAU1	staufen double-stranded RNA binding protein 1
INTS13	integrator complex subunit 13
SLC28A3	solute carrier family 28 member 3
LHPP	phospholysine phosphohistidine inorganic pyrophosphate phosphatase
ARMH3	armadillo like helical domain containing 3
NEUROG3	neurogenin 3
CACNA1H	calcium voltage-gated channel subunit alpha1 H
PERP	p53 apoptosis effector related to PMP22
OXCT2	3-oxoacid CoA-transferase 2
TMPRSS3	transmembrane serine protease 3
RBM26	RNA binding motif protein 26
TSPYL2	TSPY like 2
FIGNL1	fidgetin like 1
PRDM15	PR/SET domain 15
STX11	syntaxin 11
GNB1L	G protein subunit beta 1 like
ABR	ABR activator of RhoGEF and GTPase
LIM2	lens intrinsic membrane protein 2
ARFRP1	ADP ribosylation factor related protein 1
MFSD11	major facilitator superfamily domain containing 11
RPS10	ribosomal protein S10
HNRNPR	heterogeneous nuclear ribonucleoprotein R
UNC45B	unc-45 myosin chaperone B
DERA	deoxyribose-phosphate aldolase
RANGAP1	Ran GTPase activating protein 1
ISCU	iron-sulfur cluster assembly enzyme
EAF2	ELL associated factor 2
DGKB	diacylglycerol kinase beta
ZNF148	zinc finger protein 148
BCKDHB	branched chain keto acid dehydrogenase E1 subunit beta
HMGA1	high mobility group AT-hook 1
TAF1B	TATA-box binding protein associated factor, RNA polymerase I subunit B
SRSF11	serine and arginine rich splicing factor 11
HHLA3	HERV-H LTR-associating 3
CFL2	cofilin 2
D2HGDH	D-2-hydroxyglutarate dehydrogenase
UBXN11	UBX domain protein 11
APOL1	apolipoprotein L1
GCSAM	germinal center associated signaling and motility
PPCDC	phosphopantothenoylcysteine decarboxylase
EIF3K	eukaryotic translation initiation factor 3 subunit K
SNX14	sorting nexin 14
AUH	AU RNA binding methylglutaconyl-CoA hydratase
ZNF304	zinc finger protein 304
FOXD2-AS1	FOXD2 adjacent opposite strand RNA 1
LINC00174	long intergenic non-protein coding RNA 174
C7orf13	NA
TYW3	tRNA-yW synthesizing protein 3 homolog
EIF5A	eukaryotic translation initiation factor 5A
ANAPC7	anaphase promoting complex subunit 7
SLC6A2	solute carrier family 6 member 2
NDUFB4	NADH:ubiquinone oxidoreductase subunit B4
TESC	tescalcin
GSN	gelsolin
DLSTP1	dihydrolipoamide S-succinyltransferase pseudogene 1
RABGGTB	Rab geranylgeranyltransferase subunit beta
SNORD45C	small nucleolar RNA, C/D box 45C
SNORD45A	small nucleolar RNA, C/D box 45A
SNORD45B	small nucleolar RNA, C/D box 45B
PRSS36	serine protease 36
PPP1R12A	protein phosphatase 1 regulatory subunit 12A
SNF8	SNF8 subunit of ESCRT-II
FAM57B	NA
ST6GALNAC3	ST6 N-acetylgalactosaminide alpha-2,6-sialyltransferase 3
CDH1	cadherin 1
GNAL	G protein subunit alpha L
ZNF155	zinc finger protein 155
HADHA	hydroxyacyl-CoA dehydrogenase trifunctional multienzyme complex subunit alpha
GUSB	glucuronidase beta
AMPD3	adenosine monophosphate deaminase 3
NR3C1	nuclear receptor subfamily 3 group C member 1
SURF1	SURF1 cytochrome c oxidase assembly factor
CSGALNACT1	chondroitin sulfate N-acetylgalactosaminyltransferase 1
JAKMIP1	janus kinase and microtubule interacting protein 1
CCDC13	coiled-coil domain containing 13
ADA	adenosine deaminase
PMS2	PMS1 homolog 2, mismatch repair system component
XPR1	xenotropic and polytropic retrovirus receptor 1
ZNF25	zinc finger protein 25
TSHZ3	teashirt zinc finger homeobox 3
DLG3	discs large MAGUK scaffold protein 3
MINK1	misshapen like kinase 1
C10orf143	chromosome 10 open reading frame 143
NRBP1	nuclear receptor binding protein 1
IFI44	interferon induced protein 44
CDK2AP2	cyclin dependent kinase 2 associated protein 2
CDCA2	cell division cycle associated 2
KIAA0319	KIAA0319
TOP3A	DNA topoisomerase III alpha
DHRS3	dehydrogenase/reductase 3
SLC16A4	solute carrier family 16 member 4
SUPT6H	SPT6 homolog, histone chaperone and transcription elongation factor
ALDH4A1	aldehyde dehydrogenase 4 family member A1
LINC01725	long intergenic non-protein coding RNA 1725
LOC101927560	uncharacterized LOC101927560
OIP5	Opa interacting protein 5
TMEM25	transmembrane protein 25
NECTIN3	nectin cell adhesion molecule 3
L3MBTL1	L3MBTL histone methyl-lysine binding protein 1
WARS	NA
ZDHHC1	zinc finger DHHC-type containing 1
TRA2A	transformer 2 alpha homolog
ATF5	activating transcription factor 5
AKR7A3	aldo-keto reductase family 7 member A3
CPSF1	cleavage and polyadenylation specific factor 1
CCDC106	coiled-coil domain containing 106
FAM216A	family with sequence similarity 216 member A
PSMC3IP	PSMC3 interacting protein
STYXL1	serine/threonine/tyrosine interacting like 1
ADNP	activity dependent neuroprotector homeobox
A2M	alpha-2-macroglobulin
MARK3	microtubule affinity regulating kinase 3
YBEY	ybeY metalloendoribonuclease
ALDH18A1	aldehyde dehydrogenase 18 family member A1
INPP4A	inositol polyphosphate-4-phosphatase type I A
AHCY	adenosylhomocysteinase
MIR4423	microRNA 4423
GOLM1	golgi membrane protein 1
C1orf52	chromosome 1 open reading frame 52
HPGD	15-hydroxyprostaglandin dehydrogenase
LOC646626	uncharacterized LOC646626
FOXM1	forkhead box M1
RPS6KA5	ribosomal protein S6 kinase A5
RABEP1	rabaptin, RAB GTPase binding effector protein 1
CDKN1A	cyclin dependent kinase inhibitor 1A
ZBTB8A	zinc finger and BTB domain containing 8A
PPP1R2	protein phosphatase 1 regulatory inhibitor subunit 2
GPI	glucose-6-phosphate isomerase
GP1BA	glycoprotein Ib platelet subunit alpha
GNAT1	G protein subunit alpha transducin 1
COL24A1	collagen type XXIV alpha 1 chain
NREP	neuronal regeneration related protein
INTS12	integrator complex subunit 12
ANK1	ankyrin 1
DCUN1D1	defective in cullin neddylation 1 domain containing 1
PPIA	peptidylprolyl isomerase A
NUMBL	NUMB like endocytic adaptor protein
ANKLE1	ankyrin repeat and LEM domain containing 1
LOC105378828	NA
ATP13A2	ATPase cation transporting 13A2
R3HCC1	R3H domain and coiled-coil containing 1
NDUFB11	NADH:ubiquinone oxidoreductase subunit B11
MICB	MHC class I polypeptide-related sequence B
SELENOF	selenoprotein F
LINC01140	long intergenic non-protein coding RNA 1140
BCL11B	BAF chromatin remodeling complex subunit BCL11B
ZNF254	zinc finger protein 254
PKN2-AS1	PKN2 antisense RNA 1
SP3	Sp3 transcription factor
PPARGC1B	PPARG coactivator 1 beta
TJP2	tight junction protein 2
COPZ1	coatomer protein complex subunit zeta 1
KYAT3	kynurenine aminotransferase 3
GBP3	guanylate binding protein 3
RNPEP	arginyl aminopeptidase
HEXA	hexosaminidase subunit alpha
ZEB1	zinc finger E-box binding homeobox 1
ZFYVE19	zinc finger FYVE-type containing 19
FLT3	fms related tyrosine kinase 3
GBP1P1	guanylate binding protein 1 pseudogene 1
LRRC8C-DT	LRRC8C divergent transcript
GEMIN8P4	gem nuclear organelle associated protein 8 pseudogene 4
FEN1	flap structure-specific endonuclease 1
OSMR	oncostatin M receptor
LOC105378853	NA
DGKI	diacylglycerol kinase iota
RHOH	ras homolog family member H
CTDP1	CTD phosphatase subunit 1
DYRK1B	dual specificity tyrosine phosphorylation regulated kinase 1B
NEMF	nuclear export mediator factor
VAV3	vav guanine nucleotide exchange factor 3
SESN2	sestrin 2
PARP9	poly(ADP-ribose) polymerase family member 9
ZMIZ2	zinc finger MIZ-type containing 2
NAA16	N(alpha)-acetyltransferase 16, NatA auxiliary subunit
MCM10	minichromosome maintenance 10 replication initiation factor
LRRC59	leucine rich repeat containing 59
TMCO6	transmembrane and coiled-coil domains 6
CBWD1	COBW domain containing 1
TRMT10C	tRNA methyltransferase 10C, mitochondrial RNase P subunit
ORAI2	ORAI calcium release-activated calcium modulator 2
GLT8D1	glycosyltransferase 8 domain containing 1
SELENOS	selenoprotein S
PDP1	pyruvate dehyrogenase phosphatase catalytic subunit 1
MKL1	NA
RPA1	replication protein A1
SHISA5	shisa family member 5
ABI1	abl interactor 1
CNTN2	contactin 2
IL11RA	interleukin 11 receptor subunit alpha
HPSE2	heparanase 2 (inactive)
OCIAD2	OCIA domain containing 2
TMED5	transmembrane p24 trafficking protein 5
SMYD5	SMYD family member 5
CCDC18-AS1	CCDC18 antisense RNA 1
RIC8B	RIC8 guanine nucleotide exchange factor B
LMNA	lamin A/C
LIMK2	LIM domain kinase 2
CSNK2A3	casein kinase 2 alpha 3
IL15RA	interleukin 15 receptor subunit alpha
LOC100129046	NA
SLC50A1	solute carrier family 50 member 1
ZNF708	zinc finger protein 708
SLC25A40	solute carrier family 25 member 40
ANO10	anoctamin 10
GNG12	G protein subunit gamma 12
NSFL1C	NSFL1 cofactor
ATG16L1	autophagy related 16 like 1
TRIM68	tripartite motif containing 68
FANCL	FA complementation group L
IARS2	isoleucyl-tRNA synthetase 2, mitochondrial
SLC6A15	solute carrier family 6 member 15
NODAL	nodal growth differentiation factor
XKR8	XK related 8
VAC14	VAC14 component of PIKFYVE complex
CCDC40	coiled-coil domain containing 40
SYBU	syntabulin
ZNF780A	zinc finger protein 780A
IMPDH1	inosine monophosphate dehydrogenase 1
PALLD	palladin, cytoskeletal associated protein
PLEKHA8	pleckstrin homology domain containing A8
CCNT1	cyclin T1
TRAF3IP2-AS1	TRAF3IP2 antisense RNA 1
TMEM56-RWDD3	NA
DCAKD	dephospho-CoA kinase domain containing
CLEC4M	C-type lectin domain family 4 member M
DAB2IP	DAB2 interacting protein
TWNK	twinkle mtDNA helicase
MOV10L1	Mov10 like RISC complex RNA helicase 1
DMKN	dermokine
SNX7	sorting nexin 7
SPATA13	spermatogenesis associated 13
GALNT13	polypeptide N-acetylgalactosaminyltransferase 13
ZNF2	zinc finger protein 2
NPHP4	nephrocystin 4
DYNLT1	dynein light chain Tctex-type 1
TMEM106A	transmembrane protein 106A
TRAPPC12	trafficking protein particle complex 12
TRIM37	tripartite motif containing 37
NBR1	NBR1 autophagy cargo receptor
YTHDC2	YTH domain containing 2
IFITM1	interferon induced transmembrane protein 1
CWC27	CWC27 spliceosome associated cyclophilin
TRMT13	tRNA methyltransferase 13 homolog
COPS2	COP9 signalosome subunit 2
TGFB1I1	transforming growth factor beta 1 induced transcript 1
MSH6	mutS homolog 6
RTCA-AS1	RTCA antisense RNA 1
SGK1	serum/glucocorticoid regulated kinase 1
MIR553	microRNA 553
RREB1	ras responsive element binding protein 1
FAXC	failed axon connections homolog, metaxin like GST domain containing
FBXO11	F-box protein 11
WDR19	WD repeat domain 19
FUZ	fuzzy planar cell polarity protein
HKDC1	hexokinase domain containing 1
EXTL2	exostosin like glycosyltransferase 2
PRIMPOL	primase and DNA directed polymerase
KLHL24	kelch like family member 24
LOC102606465	uncharacterized LOC102606465
LOC101928370	uncharacterized LOC101928370
ANKRD9	ankyrin repeat domain 9
ELAC2	elaC ribonuclease Z 2
ZNF746	zinc finger protein 746
CPA4	carboxypeptidase A4
SMIM10	small integral membrane protein 10
TMEM62	transmembrane protein 62
MCOLN1	mucolipin 1
SPINK2	serine peptidase inhibitor, Kazal type 2
RECK	reversion inducing cysteine rich protein with kazal motifs
KIAA1217	KIAA1217
TWF1	twinfilin actin binding protein 1
SUPT4H1	SPT4 homolog, DSIF elongation factor subunit
CDKN2B-AS1	CDKN2B antisense RNA 1
SNX4	sorting nexin 4
REV1	REV1 DNA directed polymerase
C2orf74	chromosome 2 open reading frame 74
ACTG1P4	actin gamma 1 pseudogene 4
CD9	CD9 molecule
IL12RB2	interleukin 12 receptor subunit beta 2
HOXB3	homeobox B3
SLC35F5	solute carrier family 35 member F5
COPS4	COP9 signalosome subunit 4
PRKAG2	protein kinase AMP-activated non-catalytic subunit gamma 2
MAD1L1	mitotic arrest deficient 1 like 1
ZNF891	zinc finger protein 891
IGSF9B	immunoglobulin superfamily member 9B
PGAP2	post-GPI attachment to proteins 2
ZNF330	zinc finger protein 330
RBMS3	RNA binding motif single stranded interacting protein 3
APEX2	apurinic/apyrimidinic endodeoxyribonuclease 2
ZNF544	zinc finger protein 544
CRCP	CGRP receptor component
ARMC9	armadillo repeat containing 9
CCDC92	coiled-coil domain containing 92
PROSER1	proline and serine rich 1
OPA3	outer mitochondrial membrane lipid metabolism regulator OPA3
FHOD3	formin homology 2 domain containing 3
SAT2	spermidine/spermine N1-acetyltransferase family member 2
FGD5	FYVE, RhoGEF and PH domain containing 5
A2ML1	alpha-2-macroglobulin like 1
MAPK1IP1L	mitogen-activated protein kinase 1 interacting protein 1 like
CCDC114	coiled-coil domain containing 114
CDK1	cyclin dependent kinase 1
MYO1C	myosin IC
TMEM167B	transmembrane protein 167B
SCARNA2	small Cajal body-specific RNA 2
PLXNB3	plexin B3
TRAM1	translocation associated membrane protein 1
GFM1	G elongation factor mitochondrial 1
TMC5	transmembrane channel like 5
KLK14	kallikrein related peptidase 14
SLC22A23	solute carrier family 22 member 23
EEFSEC	eukaryotic elongation factor, selenocysteine-tRNA specific
GPRC5C	G protein-coupled receptor class C group 5 member C
ATG101	autophagy related 101
ZBTB26	zinc finger and BTB domain containing 26
RIC8A	RIC8 guanine nucleotide exchange factor A
DHX35	DEAH-box helicase 35
FXYD7	FXYD domain containing ion transport regulator 7
ADD3	adducin 3
PPM1A	protein phosphatase, Mg2+/Mn2+ dependent 1A
GPAM	glycerol-3-phosphate acyltransferase, mitochondrial
HIST1H3F	NA
PLXNA4	plexin A4
UBC	ubiquitin C
SCN2A	sodium voltage-gated channel alpha subunit 2
DPH7	diphthamide biosynthesis 7
FKBP3	FKBP prolyl isomerase 3
CUX1	cut like homeobox 1
HES6	hes family bHLH transcription factor 6
CHST12	carbohydrate sulfotransferase 12
WSB2	WD repeat and SOCS box containing 2
ETNK1	ethanolamine kinase 1
CSGALNACT2	chondroitin sulfate N-acetylgalactosaminyltransferase 2
CAMK2N1	calcium/calmodulin dependent protein kinase II inhibitor 1
STRADB	STE20 related adaptor beta
AP1AR	adaptor related protein complex 1 associated regulatory protein
SERINC2	serine incorporator 2
USP49	ubiquitin specific peptidase 49
GPALPP1	GPALPP motifs containing 1
GPR158	G protein-coupled receptor 158
SLTM	SAFB like transcription modulator
INTS2	integrator complex subunit 2
TKFC	triokinase and FMN cyclase
POLR2M	RNA polymerase II subunit M
C2CD3	C2 domain containing 3 centriole elongation regulator
BRCA1	BRCA1 DNA repair associated
REXO2	RNA exonuclease 2
MAGI1	membrane associated guanylate kinase, WW and PDZ domain containing 1
HINFP	histone H4 transcription factor
TSKU	tsukushi, small leucine rich proteoglycan
ABCB4	ATP binding cassette subfamily B member 4
PEG10	paternally expressed 10
FAN1	FANCD2 and FANCI associated nuclease 1
EPN2	epsin 2
PNMA2	PNMA family member 2
NECAP1	NECAP endocytosis associated 1
DHRS7B	dehydrogenase/reductase 7B
TIPARP	TCDD inducible poly(ADP-ribose) polymerase
TMEM87A	transmembrane protein 87A
SLC35E3	solute carrier family 35 member E3
GHRL	ghrelin and obestatin prepropeptide
ZNF658	zinc finger protein 658
MON1A	MON1 homolog A, secretory trafficking associated
BET1	Bet1 golgi vesicular membrane trafficking protein
PBXIP1	PBX homeobox interacting protein 1
EFCAB2	EF-hand calcium binding domain 2
NRG1	neuregulin 1
PITX2	paired like homeodomain 2
RPL10	ribosomal protein L10
APOBEC3F	apolipoprotein B mRNA editing enzyme catalytic subunit 3F
PTPDC1	protein tyrosine phosphatase domain containing 1
DUSP15	dual specificity phosphatase 15
RTTN	rotatin
ARL5A	ADP ribosylation factor like GTPase 5A
PPM1G	protein phosphatase, Mg2+/Mn2+ dependent 1G
ARL6	ADP ribosylation factor like GTPase 6
CASC4	cancer susceptibility 4
ST3GAL4	ST3 beta-galactoside alpha-2,3-sialyltransferase 4
NUDT16L1	nudix hydrolase 16 like 1
TMEM116	transmembrane protein 116
PIK3C2A	phosphatidylinositol-4-phosphate 3-kinase catalytic subunit type 2 alpha
FBXL2	F-box and leucine rich repeat protein 2
FOXP1	forkhead box P1
UIMC1	ubiquitin interaction motif containing 1
CEPT1	choline/ethanolamine phosphotransferase 1
TJAP1	tight junction associated protein 1
ACYP2	acylphosphatase 2
MST1R	macrophage stimulating 1 receptor
CLCN5	chloride voltage-gated channel 5
MBIP	MAP3K12 binding inhibitory protein 1
IRAK3	interleukin 1 receptor associated kinase 3
FAM111A	family with sequence similarity 111 member A
SULT2B1	sulfotransferase family 2B member 1
STX1A	syntaxin 1A
PSMG3-AS1	PSMG3 antisense RNA 1 (head to head)
SGPP2	sphingosine-1-phosphate phosphatase 2
ARMCX4	armadillo repeat containing X-linked 4
ELOVL1	ELOVL fatty acid elongase 1
ZBTB7B	zinc finger and BTB domain containing 7B
FAM212B-AS1	NA
LOC101928718	uncharacterized LOC101928718
EMP2	epithelial membrane protein 2
EMP1	epithelial membrane protein 1
HPS4	HPS4 biogenesis of lysosomal organelles complex 3 subunit 2
ZNF654	zinc finger protein 654
BOLA1	bolA family member 1
C1orf109	chromosome 1 open reading frame 109
PRPF38B	pre-mRNA processing factor 38B
CARS	NA
SLC16A1-AS1	SLC16A1 antisense RNA 1
PNPLA6	patatin like phospholipase domain containing 6
UFM1	ubiquitin fold modifier 1
GARNL3	GTPase activating Rap/RanGAP domain like 3
PRR22	proline rich 22
HK1	hexokinase 1
HGD	homogentisate 1,2-dioxygenase
CFH	complement factor H
ARSA	arylsulfatase A
APRT	adenine phosphoribosyltransferase
MVK	mevalonate kinase
GRINA	glutamate ionotropic receptor NMDA type subunit associated protein 1
PHTF1	putative homeodomain transcription factor 1
LRRC34	leucine rich repeat containing 34
ZNF555	zinc finger protein 555
DPY19L3	dpy-19 like C-mannosyltransferase 3
DNAI2	dynein axonemal intermediate chain 2
SLC30A8	solute carrier family 30 member 8
PGM1	phosphoglucomutase 1
RSBN1	round spermatid basic protein 1
AP4B1-AS1	AP4B1 antisense RNA 1
TADA2A	transcriptional adaptor 2A
ADCY10	adenylate cyclase 10
MFF	mitochondrial fission factor
SP140	SP140 nuclear body protein
FGFR3	fibroblast growth factor receptor 3
UBE2J1	ubiquitin conjugating enzyme E2 J1
DLEC1	DLEC1 cilia and flagella associated protein
KLRD1	killer cell lectin like receptor D1
KLRC3	killer cell lectin like receptor C3
IMMT	inner membrane mitochondrial protein
COPS5	COP9 signalosome subunit 5
COPS6	COP9 signalosome subunit 6
FERMT2	fermitin family member 2
UQCR11	ubiquinol-cytochrome c reductase, complex III subunit XI
KLF12	Kruppel like factor 12
DUSP12	dual specificity phosphatase 12
KLHL2	kelch like family member 2
ATXN2L	ataxin 2 like
DDX19B	DEAD-box helicase 19B
HSPA12A	heat shock protein family A (Hsp70) member 12A
MSL3	MSL complex subunit 3
CDKN2C	cyclin dependent kinase inhibitor 2C
VNN2	vanin 2
RORA	RAR related orphan receptor A
DHPS	deoxyhypusine synthase
ANK2	ankyrin 2
PIGC	phosphatidylinositol glycan anchor biosynthesis class C
HNRNPA2B1	heterogeneous nuclear ribonucleoprotein A2/B1
DMD	dystrophin
KLHL28	kelch like family member 28
LINC01762	long intergenic non-protein coding RNA 1762
INPP5F	inositol polyphosphate-5-phosphatase F
ARHGEF9	Cdc42 guanine nucleotide exchange factor 9
TBC1D1	TBC1 domain family member 1
SESN1	sestrin 1
PRKACB	protein kinase cAMP-activated catalytic subunit beta
TMEM63C	transmembrane protein 63C
PARVG	parvin gamma
LOC101929099	uncharacterized LOC101929099
ANAPC10	anaphase promoting complex subunit 10
PRDM11	PR/SET domain 11
PCDHGB1	protocadherin gamma subfamily B, 1
C11orf71	chromosome 11 open reading frame 71
RIMS1	regulating synaptic membrane exocytosis 1
AKT1S1	AKT1 substrate 1
TGFBRAP1	transforming growth factor beta receptor associated protein 1
SLC22A13	solute carrier family 22 member 13
IL1R1	interleukin 1 receptor type 1
IFNLR1	interferon lambda receptor 1
TBX3	T-box transcription factor 3
LOC101929147	NA
CEACAM21	CEA cell adhesion molecule 21
TRIM2	tripartite motif containing 2
HSD3BP4	hydroxy-delta-5-steroid dehydrogenase, 3 beta, pseudogene 4
CTNNA1	catenin alpha 1
STX7	syntaxin 7
SLC4A3	solute carrier family 4 member 3
LOC100996724	phosphodiesterase 4D interacting protein-like
RNVU1-19	RNA, variant U1 small nuclear 19
CFAP61	cilia and flagella associated protein 61
LNPEP	leucyl and cystinyl aminopeptidase
OTUD5	OTU deubiquitinase 5
HIST2H2BA	NA
CCM2	CCM2 scaffold protein
VANGL1	VANGL planar cell polarity protein 1
KRR1	KRR1 small subunit processome component homolog
LOC645166	NA
DCTN1	dynactin subunit 1
FAM72C	family with sequence similarity 72 member C
SRGAP2D	SLIT-ROBO Rho GTPase activating protein 2D (pseudogene)
GINS3	GINS complex subunit 3
RNVU1-15	RNA, variant U1 small nuclear 15
CXCR3	C-X-C motif chemokine receptor 3
GP2	glycoprotein 2
GNRH2	gonadotropin releasing hormone 2
GATM	glycine amidinotransferase
ACOXL	acyl-CoA oxidase like
ZNF185	zinc finger protein 185 with LIM domain
PDE4B	phosphodiesterase 4B
MTHFR	methylenetetrahydrofolate reductase
LOC103091866	NA
RNVU1-14	RNA, variant U1 small nuclear 14
CAPN2	calpain 2
PPP2R2B	protein phosphatase 2 regulatory subunit Bbeta
METTL2A	methyltransferase like 2A
TMEM119	transmembrane protein 119
MICU3	mitochondrial calcium uptake family member 3
TMCO4	transmembrane and coiled-coil domains 4
ARHGAP30	Rho GTPase activating protein 30
ASPHD1	aspartate beta-hydroxylase domain containing 1
CENPV	centromere protein V
LCA5	lebercilin LCA5
UBXN2A	UBX domain protein 2A
HFE	homeostatic iron regulator
CANT1	calcium activated nucleotidase 1
MRRF	mitochondrial ribosome recycling factor
SLC25A46	solute carrier family 25 member 46
BAX	BCL2 associated X, apoptosis regulator
ABCD4	ATP binding cassette subfamily D member 4
ARHGEF2	Rho/Rac guanine nucleotide exchange factor 2
RBFOX2	RNA binding fox-1 homolog 2
FKTN	fukutin
COL18A1	collagen type XVIII alpha 1 chain
GNRHR2	gonadotropin releasing hormone receptor 2 (pseudogene)
SPAG8	sperm associated antigen 8
LINC01719	long intergenic non-protein coding RNA 1719
ASPDH	aspartate dehydrogenase domain containing
SZRD1	SUZ RNA binding domain containing 1
DHX36	DEAH-box helicase 36
CNTLN	centlein
PAPD4	NA
UPK3BL1	uroplakin 3B like 1
DDX3X	DEAD-box helicase 3 X-linked
TUBA8	tubulin alpha 8
PTPA	protein phosphatase 2 phosphatase activator
TERT	telomerase reverse transcriptase
HYDIN2	HYDIN axonemal central pair apparatus protein 2 (pseudogene)
IDI2-AS1	IDI2 antisense RNA 1
TIAM1	TIAM Rac1 associated GEF 1
NUDT1	nudix hydrolase 1
TGM2	transglutaminase 2
VSIG2	V-set and immunoglobulin domain containing 2
RGL1	ral guanine nucleotide dissociation stimulator like 1
CALM3	calmodulin 3
TROVE2	NA
CDCA3	cell division cycle associated 3
ALKBH6	alkB homolog 6
SERPINB6	serpin family B member 6
CCDC125	coiled-coil domain containing 125
PDP2	pyruvate dehyrogenase phosphatase catalytic subunit 2
PPP1R12B	protein phosphatase 1 regulatory subunit 12B
C1orf43	chromosome 1 open reading frame 43
TMCC2	transmembrane and coiled-coil domain family 2
ZNF417	zinc finger protein 417
SLC19A2	solute carrier family 19 member 2
RTL6	retrotransposon Gag like 6
ZDHHC18	zinc finger DHHC-type containing 18
MIR7-1	microRNA 7-1
ATP7A	ATPase copper transporting alpha
FBXL5	F-box and leucine rich repeat protein 5
VDAC1	voltage dependent anion channel 1
PAX5	paired box 5
VPS29	VPS29 retromer complex component
HSH2D	hematopoietic SH2 domain containing
SLC6A9	solute carrier family 6 member 9
LYST	lysosomal trafficking regulator
CRIP2	cysteine rich protein 2
SNRPD3	small nuclear ribonucleoprotein D3 polypeptide
SON	SON DNA binding protein
DHFR	dihydrofolate reductase
HIVEP3	HIVEP zinc finger 3
NDUFA7	NADH:ubiquinone oxidoreductase subunit A7
CCDC174	coiled-coil domain containing 174
SLC4A7	solute carrier family 4 member 7
LINC00624	long intergenic non-protein coding RNA 624
EFTUD2	elongation factor Tu GTP binding domain containing 2
ACP6	acid phosphatase 6, lysophosphatidic
OCRL	OCRL inositol polyphosphate-5-phosphatase
KBTBD4	kelch repeat and BTB domain containing 4
ZNF532	zinc finger protein 532
WDR46	WD repeat domain 46
RNVU1-7	RNA, variant U1 small nuclear 7
SMARCC2	SWI/SNF related, matrix associated, actin dependent regulator of chromatin subfamily c member 2
CYTH3	cytohesin 3
IL32	interleukin 32
NBPF11	NBPF member 11
MIR5087	microRNA 5087
RNVU1-1	RNA, variant U1 small nuclear 1
LOC100132057	phosphodiesterase 4D interacting protein pseudogene
RNVU1-3	RNA, variant U1 small nuclear 3
TTC21A	tetratricopeptide repeat domain 21A
KIFC2	kinesin family member C2
PHLDB2	pleckstrin homology like domain family B member 2
TRIP12	thyroid hormone receptor interactor 12
PCNP	PEST proteolytic signal containing nuclear protein
USP48	ubiquitin specific peptidase 48
ASCC1	activating signal cointegrator 1 complex subunit 1
C3orf18	chromosome 3 open reading frame 18
GBP1	guanylate binding protein 1
GATA1	GATA binding protein 1
E2F4	E2F transcription factor 4
GAS1	growth arrest specific 1
DUSP7	dual specificity phosphatase 7
CD320	CD320 molecule
SLC12A4	solute carrier family 12 member 4
TSC2	TSC complex subunit 2
UBA5	ubiquitin like modifier activating enzyme 5
LINC00869	long intergenic non-protein coding RNA 869
TBC1D23	TBC1 domain family member 23
ALOX5AP	arachidonate 5-lipoxygenase activating protein
AKT2	AKT serine/threonine kinase 2
HIST2H2BC	NA
RPL36AL	ribosomal protein L36a like
RPL39	ribosomal protein L39
MGAT1	alpha-1,3-mannosyl-glycoprotein 2-beta-N-acetylglucosaminyltransferase
SLC31A1	solute carrier family 31 member 1
MGAT2	alpha-1,6-mannosyl-glycoprotein 2-beta-N-acetylglucosaminyltransferase
MEF2C	myocyte enhancer factor 2C
VLDLR	very low density lipoprotein receptor
RAB29	RAB29, member RAS oncogene family
VIPR2	vasoactive intestinal peptide receptor 2
SKAP2	src kinase associated phosphoprotein 2
44443	NA
GLUD1	glutamate dehydrogenase 1
LOC105371433	uncharacterized LOC105371433
ARHGEF3	Rho guanine nucleotide exchange factor 3
MACROD2	mono-ADP ribosylhydrolase 2
FBXO28	F-box protein 28
GRHL2	grainyhead like transcription factor 2
MRPS15	mitochondrial ribosomal protein S15
RNF17	ring finger protein 17
PHC3	polyhomeotic homolog 3
TEX12	testis expressed 12
RBCK1	RANBP2-type and C3HC4-type zinc finger containing 1
DFFB	DNA fragmentation factor subunit beta
ARHGAP20	Rho GTPase activating protein 20
NDUFAF7	NADH:ubiquinone oxidoreductase complex assembly factor 7
SNIP1	Smad nuclear interacting protein 1
ZFP2	ZFP2 zinc finger protein
STARD13	StAR related lipid transfer domain containing 13
MMAB	metabolism of cobalamin associated B
OBSCN	obscurin, cytoskeletal calmodulin and titin-interacting RhoGEF
ADAMTSL4-AS1	ADAMTSL4 antisense RNA 1
LAMTOR4	late endosomal/lysosomal adaptor, MAPK and MTOR activator 4
NIT1	nitrilase 1
PLCL1	phospholipase C like 1 (inactive)
PLTP	phospholipid transfer protein
POLD2	DNA polymerase delta 2, accessory subunit
DNM1L	dynamin 1 like
DPP3	dipeptidyl peptidase 3
ODR4	odr-4 GPCR localization factor homolog
ABCC5	ATP binding cassette subfamily C member 5
GPR55	G protein-coupled receptor 55
ADGRG1	adhesion G protein-coupled receptor G1
TAF1A	TATA-box binding protein associated factor, RNA polymerase I subunit A
APOA1	apolipoprotein A1
BCL2L1	BCL2 like 1
SPAG4	sperm associated antigen 4
UAP1	UDP-N-acetylglucosamine pyrophosphorylase 1
SPAG1	sperm associated antigen 1
PDGFA	platelet derived growth factor subunit A
PDE9A	phosphodiesterase 9A
PDE8A	phosphodiesterase 8A
SP2	Sp2 transcription factor
ALK	ALK receptor tyrosine kinase
ARHGEF1	Rho guanine nucleotide exchange factor 1
FAM122C	family with sequence similarity 122C
RANBP3L	RAN binding protein 3 like
ANKRD35	ankyrin repeat domain 35
MXRA7	matrix remodeling associated 7
WDR73	WD repeat domain 73
KLRF1	killer cell lectin like receptor F1
CD24	CD24 molecule
ZCCHC9	zinc finger CCHC-type containing 9
PPP6R2	protein phosphatase 6 regulatory subunit 2
NSUN6	NOP2/Sun RNA methyltransferase 6
TCTEX1D2	Tctex1 domain containing 2
LDHB	lactate dehydrogenase B
INSM1	INSM transcriptional repressor 1
ITGA5	integrin subunit alpha 5
ORC6	origin recognition complex subunit 6
HEBP2	heme binding protein 2
ICE2	interactor of little elongation complex ELL subunit 2
HSPBAP1	HSPB1 associated protein 1
ETAA1	ETAA1 activator of ATR kinase
MAP7D3	MAP7 domain containing 3
SUCNR1	succinate receptor 1
MYBPC1	myosin binding protein C, slow type
LOC100507670	NA
MAST4	microtubule associated serine/threonine kinase family member 4
HEXIM2	HEXIM P-TEFb complex subunit 2
ACSS1	acyl-CoA synthetase short chain family member 1
GBAT2	glioblastoma multiforme-associated transcript 2
MX1	MX dynamin like GTPase 1
PSMB5	proteasome 20S subunit beta 5
NR1H3	nuclear receptor subfamily 1 group H member 3
PPP2R5D	protein phosphatase 2 regulatory subunit B'delta
ZNF692	zinc finger protein 692
ERAL1	Era like 12S mitochondrial rRNA chaperone 1
PPP2R5A	protein phosphatase 2 regulatory subunit B'alpha
PPP1R3D	protein phosphatase 1 regulatory subunit 3D
PPEF2	protein phosphatase with EF-hand domain 2
CLCC1	chloride channel CLIC like 1
ZNRD1	zinc ribbon domain containing 1
TAX1BP3	Tax1 binding protein 3
SEMA3E	semaphorin 3E
NOL4L	nucleolar protein 4 like
FAM98C	family with sequence similarity 98 member C
DZANK1	double zinc ribbon and ankyrin repeat domains 1
ZNF787	zinc finger protein 787
MRPL9	mitochondrial ribosomal protein L9
ABLIM2	actin binding LIM protein family member 2
STOML2	stomatin like 2
TSPAN10	tetraspanin 10
VPS11	VPS11 core subunit of CORVET and HOPS complexes
TDRKH-AS1	TDRKH antisense RNA 1
SPI1	Spi-1 proto-oncogene
UTY	ubiquitously transcribed tetratricopeptide repeat containing, Y-linked
OIP5-AS1	OIP5 antisense RNA 1
PIGL	phosphatidylinositol glycan anchor biosynthesis class L
CDAN1	codanin 1
NLRP11	NLR family pyrin domain containing 11
SUSD3	sushi domain containing 3
FLG-AS1	FLG antisense RNA 1
SAXO1	stabilizer of axonemal microtubules 1
RPS9	ribosomal protein S9
PDGFB	platelet derived growth factor subunit B
C16orf71	chromosome 16 open reading frame 71
GABRB3	gamma-aminobutyric acid type A receptor beta3 subunit
SPECC1	sperm antigen with calponin homology and coiled-coil domains 1
STARD4	StAR related lipid transfer domain containing 4
ALS2CR12	NA
CRB3	crumbs cell polarity complex component 3
DEPDC7	DEP domain containing 7
NEK7	NIMA related kinase 7
CCDC6	coiled-coil domain containing 6
PRMT2	protein arginine methyltransferase 2
ARHGAP26	Rho GTPase activating protein 26
REEP5	receptor accessory protein 5
LOC101928034	uncharacterized LOC101928034
TMEM254	transmembrane protein 254
ETNK2	ethanolamine kinase 2
SETD7	SET domain containing 7, histone lysine methyltransferase
MOSPD1	motile sperm domain containing 1
ARHGEF6	Rac/Cdc42 guanine nucleotide exchange factor 6
PHF21B	PHD finger protein 21B
CDK11B	cyclin dependent kinase 11B
RIC3	RIC3 acetylcholine receptor chaperone
MAP2K3	mitogen-activated protein kinase kinase 3
BSPRY	B-box and SPRY domain containing
PRUNE2	prune homolog 2 with BCH domain
ATP2A2	ATPase sarcoplasmic/endoplasmic reticulum Ca2+ transporting 2
LRRFIP1	LRR binding FLII interacting protein 1
CREB3L4	cAMP responsive element binding protein 3 like 4
TMX2	thioredoxin related transmembrane protein 2
FAM76A	family with sequence similarity 76 member A
SLAMF7	SLAM family member 7
PTGES3	prostaglandin E synthase 3
MADD	MAP kinase activating death domain
TAF5	TATA-box binding protein associated factor 5
IL5RA	interleukin 5 receptor subunit alpha
HILPDA	hypoxia inducible lipid droplet associated
SFTPA2	surfactant protein A2
CEP78	centrosomal protein 78
APBB2	amyloid beta precursor protein binding family B member 2
PFKFB4	6-phosphofructo-2-kinase/fructose-2,6-biphosphatase 4
PALM2	NA
SHKBP1	SH3KBP1 binding protein 1
DCST2	DC-STAMP domain containing 2
ZNF260	zinc finger protein 260
SBSN	suprabasin
TMEM2	NA
DCAF6	DDB1 and CUL4 associated factor 6
SNORA58B	small nucleolar RNA, H/ACA box 58B
[truncated: 15,661 more rows]

## Sheet: Gene_up_IL15
CELF4	CUGBP Elav-like family member 4
CAMTA1-DT	CAMTA1 divergent transcript
LOC105376805	uncharacterized LOC105376805
RASGRP3	RAS guanyl releasing protein 3
CCRL2	C-C motif chemokine receptor like 2
AFAP1L2	actin filament associated protein 1 like 2
SHROOM3	shroom family member 3
ATP2B2	ATPase plasma membrane Ca2+ transporting 2
GRHL3	grainyhead like transcription factor 3
GNG12	G protein subunit gamma 12
LOC729970	hCG2028352-like
EXTL2	exostosin like glycosyltransferase 2
SERINC2	serine incorporator 2
RUBCNL	rubicon like autophagy enhancer
PRLR	prolactin receptor
SNTG2	syntrophin gamma 2
SNORD75	small nucleolar RNA, C/D box 75
GRAMD2A	GRAM domain containing 2A
SLCO5A1	solute carrier organic anion transporter family member 5A1
SFRP2	secreted frizzled related protein 2
BEND3P3	BEN domain containing 3 pseudogene 3
PARD6G	par-6 family cell polarity regulator gamma
HLX-AS1	HLX antisense RNA 1
RLN2	relaxin 2
LINC01703	long intergenic non-protein coding RNA 1703
ADAP2	ArfGAP with dual PH domains 2
NEUROG2	neurogenin 2
OBSL1	obscurin like cytoskeletal adaptor 1
PLA1A	phospholipase A1 member A
ACTG2	actin gamma 2, smooth muscle
NUAK1	NUAK family kinase 1
SYNGR1	synaptogyrin 1
CFAP58-AS1	NA
ACTL7B	actin like 7B
AS-PTPRE	lncRNA antisense to PTPRE protein-coding gene
CA4	carbonic anhydrase 4
PDZK1	PDZ domain containing 1
SORD2P	sorbitol dehydrogenase 2, pseudogene
LOC105369340	NA
CALB2	calbindin 2
USP2-AS1	USP2 antisense RNA 1 (head to head)
LIPH	lipase H
CLLU1OS	chronic lymphocytic leukemia up-regulated 1 opposite strand
DZIP1L	DAZ interacting zinc finger protein 1 like
SDSL	serine dehydratase like
MAP2K4P1	mitogen-activated protein kinase kinase 4 pseudogene 1
MGAT3	beta-1,4-mannosyl-glycoprotein 4-beta-N-acetylglucosaminyltransferase
RGPD3	RANBP2 like and GRIP domain containing 3
EGLN2	egl-9 family hypoxia inducible factor 2
CPEB1	cytoplasmic polyadenylation element binding protein 1
C11orf86	chromosome 11 open reading frame 86
LINC02256	long intergenic non-protein coding RNA 2256
BFSP1	beaded filament structural protein 1
KCNE1	potassium voltage-gated channel subfamily E regulatory subunit 1
CLCNKA	chloride voltage-gated channel Ka
TPPP3	tubulin polymerization promoting protein family member 3
COL5A2	collagen type V alpha 2 chain
CRYBB2	crystallin beta B2
NPTX2	neuronal pentraxin 2
CHST1	carbohydrate sulfotransferase 1
PTHLH	parathyroid hormone like hormone
RNF224	ring finger protein 224
NR5A1	nuclear receptor subfamily 5 group A member 1
SNORD135	small nucleolar RNA, C/D box 135
FRMPD3	FERM and PDZ domain containing 3
CERS1	ceramide synthase 1
MTUS2	microtubule associated scaffold protein 2
SMAD9	SMAD family member 9
SPERT	NA
CMPK2	cytidine/uridine monophosphate kinase 2
PIK3CG	phosphatidylinositol-4,5-bisphosphate 3-kinase catalytic subunit gamma
BASP1	brain abundant membrane attached signal protein 1
LOC105373496	uncharacterized LOC105373496
PKD2L1	polycystin 2 like 1, transient receptor potential cation channel
ALDH3B1	aldehyde dehydrogenase 3 family member B1
JCHAIN	joining chain of multimeric IgA and IgM
C4orf36	chromosome 4 open reading frame 36
MKLN1-AS	MKLN1 antisense RNA
MIR3192	microRNA 3192
ANAPC1P1	anaphase promoting complex subunit 1 pseudogene 1
DLGAP4-AS1	DLGAP4 antisense RNA 1
SNORA91	small nucleolar RNA, H/ACA box 91
REEP1	receptor accessory protein 1
CECR3	cat eye syndrome chromosome region, candidate 3
LOC107985544	uncharacterized LOC107985544
BFSP2	beaded filament structural protein 2
ZNF233	zinc finger protein 233
F2RL3	F2R like thrombin or trypsin receptor 3
LINC02381	long intergenic non-protein coding RNA 2381
FGF2	fibroblast growth factor 2
ZNF423	zinc finger protein 423
LINC00337	long intergenic non-protein coding RNA 337
DUBR	DPPA2 upstream binding RNA
LRRC46	leucine rich repeat containing 46
PRDM5	PR/SET domain 5
LOC101928105	uncharacterized LOC101928105
ADIPOQ-AS1	ADIPOQ antisense RNA 1
TMEM191A	transmembrane protein 191A (pseudogene)
BST1	bone marrow stromal cell antigen 1
RAMP3	receptor activity modifying protein 3
KRT3	keratin 3
LY6E-DT	LY6E divergent transcript
PIANP	PILR alpha associated neural protein
LOC102724404	uncharacterized LOC102724404
SH3D19	SH3 domain containing 19
DAZL	deleted in azoospermia like
SNORD100	small nucleolar RNA, C/D box 100
MIR5189	microRNA 5189
MCHR1	melanin concentrating hormone receptor 1
TNFSF15	TNF superfamily member 15
DNAH7	dynein axonemal heavy chain 7
FAM170B	family with sequence similarity 170 member B
HNRNPA3P1	heterogeneous nuclear ribonucleoprotein A3 pseudogene 1
SLC12A8	solute carrier family 12 member 8
RIPK4	receptor interacting serine/threonine kinase 4
LOC100130705	NA
PRKCG	protein kinase C gamma
LOC100130298	hCG1816373-like
PDLIM4	PDZ and LIM domain 4
COL3A1	collagen type III alpha 1 chain
SPDYE5	speedy/RINGO cell cycle regulator family member E5
MIR4665	microRNA 4665
ANXA2P2	annexin A2 pseudogene 2
F11	coagulation factor XI
FRG1JP	FSHD region gene 1 family member J, pseudogene
LOC100506100	uncharacterized LOC100506100
ESPNL	espin like
FMR1-AS1	FMR1 antisense RNA 1
LINC02427	long intergenic non-protein coding RNA 2427
B3GLCT	beta 3-glucosyltransferase
CPLX3	complexin 3
SLC45A1	solute carrier family 45 member 1
PRR25	proline rich 25
C2orf71	NA

## Sheet: Gene_down_IL15
ALDH1A1	aldehyde dehydrogenase 1 family member A1
RXRB	retinoid X receptor beta
MIR5585	microRNA 5585
FLRT1	fibronectin leucine rich transmembrane protein 1
DDAH1	dimethylarginine dimethylaminohydrolase 1
SNORD145	small nucleolar RNA, C/D box 145
SHISAL2A	shisa like 2A
SLC28A3	solute carrier family 28 member 3
TMEM56-RWDD3	NA
VNN2	vanin 2
CCDC125	coiled-coil domain containing 125
LINC01675	long intergenic non-protein coding RNA 1675
FSIP1	fibrous sheath interacting protein 1
ARHGAP6	Rho GTPase activating protein 6
SNORD81	small nucleolar RNA, C/D box 81
TMEM246	NA
HLA-E	major histocompatibility complex, class I, E
INMT	indolethylamine N-methyltransferase
LST1	leukocyte specific transcript 1
C6orf223	chromosome 6 open reading frame 223
STXBP6	syntaxin binding protein 6
LINC00866	long intergenic non-protein coding RNA 866
ENPP3	ectonucleotide pyrophosphatase/phosphodiesterase 3
LINC00400	long intergenic non-protein coding RNA 400
UGGT2	UDP-glucose glycoprotein glucosyltransferase 2
SNORD116-21	small nucleolar RNA, C/D box 116-21
LINC02551	long intergenic non-protein coding RNA 2551
C10orf105	chromosome 10 open reading frame 105
LINC01115	long intergenic non-protein coding RNA 1115
ANKRD26P3	ankyrin repeat domain 26 pseudogene 3
LOC101929718	uncharacterized LOC101929718
LOC100288846	uncharacterized LOC100288846
LOC101927620	uncharacterized LOC101927620
LOC100288637	OTU deubiquitinase 7A pseudogene
MMP19	matrix metallopeptidase 19
LMO2	LIM domain only 2
MANEA-AS1	NA
MIR193BHG	MIR193B host gene
RCN3	reticulocalbin 3
ANKEF1	ankyrin repeat and EF-hand domain containing 1
LOC105371592	uncharacterized LOC105371592
DSG2	desmoglein 2
MIR640	microRNA 640
SSTR1	somatostatin receptor 1
SHOX2	short stature homeobox 2
LOC102725254	uncharacterized LOC102725254
SRPK3	SRSF protein kinase 3
SLC39A5	solute carrier family 39 member 5
LOC101930071	uncharacterized LOC101930071
KLHL23	kelch like family member 23
PGLYRP3	peptidoglycan recognition protein 3
SCN3A	sodium voltage-gated channel alpha subunit 3
MIR4263	microRNA 4263
ARHGEF28	Rho guanine nucleotide exchange factor 28
SYN2	synapsin II
TBC1D8-AS1	TBC1 domain family member 8 antisense RNA 1
MIR4785	microRNA 4785
SNORD11B	small nucleolar RNA, C/D box 11B
RASGEF1C	RasGEF domain family member 1C
HSPA1B	heat shock protein family A (Hsp70) member 1B
LINC01907	long intergenic non-protein coding RNA 1907
MIR1914	microRNA 1914
ANKRD20A11P	ankyrin repeat domain 20 family member A11, pseudogene
NEURL1B	neuralized E3 ubiquitin protein ligase 1B
LINC01671	long intergenic non-protein coding RNA 1671
MIR374B	microRNA 374b
CCBE1	collagen and calcium binding EGF domains 1
CREB3L3	cAMP responsive element binding protein 3 like 3
EVA1A	eva-1 homolog A, regulator of programmed cell death
FAM218A	family with sequence similarity 218 member A
LINC01088	long intergenic non-protein coding RNA 1088
FXYD1	FXYD domain containing ion transport regulator 1
MIR5687	microRNA 5687
SMIM15-AS1	SMIM15 antisense RNA 1
MIR4804	microRNA 4804
LINC01336	NA
ALOX15B	arachidonate 15-lipoxygenase type B
RGS13	regulator of G protein signaling 13
ARMH2	armadillo like helical domain containing 2
44256	NA
ADGRD1	adhesion G protein-coupled receptor D1
SFN	stratifin
RNF216-IT1	RNF216 intronic transcript 1
LOC100506098	uncharacterized LOC100506098
RNASE2	ribonuclease A family member 2
MIR6840	microRNA 6840
CSTF3-AS1	NA
COL1A2	collagen type I alpha 2 chain
SNORD149	small nucleolar RNA, C/D box 149
MIR4473	microRNA 4473
LOC100507346	uncharacterized LOC100507346
LOC101928438	uncharacterized LOC101928438
MIR6855	microRNA 6855
RASA4	RAS p21 protein activator 4
XPNPEP2	X-prolyl aminopeptidase 2
C19orf81	chromosome 19 open reading frame 81
ITGA11	integrin subunit alpha 11
MIR31HG	MIR31 host gene

## Sheet: Gene_insig_IL15
NSMF	NMDA receptor synaptonuclear signaling and neuronal migration factor
LOC729737	uncharacterized LOC729737
LOC100133331	uncharacterized LOC100133331
LOC100288069	uncharacterized LOC100288069
FAM87B	family with sequence similarity 87 member B
LINC00115	long intergenic non-protein coding RNA 115
NR1I2	nuclear receptor subfamily 1 group I member 2
TNFSF11	TNF superfamily member 11
CEP19	centrosomal protein 19
NLRP1	NLR family pyrin domain containing 1
LOC100130417	NA
AGL	amylo-alpha-1, 6-glucosidase, 4-alpha-glucanotransferase
NES	nestin
HSPA8	heat shock protein family A (Hsp70) member 8
SOX21	SRY-box transcription factor 21
MMP23B	matrix metallopeptidase 23B
NUDT6	nudix hydrolase 6
SNW1	SNW domain containing 1
FAF1	Fas associated factor 1
C1orf159	chromosome 1 open reading frame 159
ZCCHC4	zinc finger CCHC-type containing 4
TREM1	triggering receptor expressed on myeloid cells 1
PCBP4	poly(rC) binding protein 4
PPP2R2C	protein phosphatase 2 regulatory subunit Bgamma
CHMP1B	charged multivesicular body protein 1B
ATP13A1	ATPase 13A1
MRPL47	mitochondrial ribosomal protein L47
TPD52	tumor protein D52
MEOX1	mesenchyme homeobox 1
GJC2	gap junction protein gamma 2
JPH2	junctophilin 2
PHTF2	putative homeodomain transcription factor 2
CCDC28B	coiled-coil domain containing 28B
SNORD167	small nucleolar RNA, C/D box 167
ACHE	acetylcholinesterase (Cartwright blood group)
PUSL1	pseudouridine synthase like 1
CLASP1	cytoplasmic linker associated protein 1
NIPA1	NIPA magnesium transporter 1
NFATC4	nuclear factor of activated T cells 4
ASAH2	N-acylsphingosine amidohydrolase 2
RAN	RAN, member RAS oncogene family
S1PR4	sphingosine-1-phosphate receptor 4
AK7	adenylate kinase 7
LSS	lanosterol synthase
NIPAL3	NIPA like domain containing 3
CCNL2	cyclin L2
SLC35D2	solute carrier family 35 member D2
PPIE	peptidylprolyl isomerase E
CLEC12B	C-type lectin domain family 12 member B
ZC3H11A	zinc finger CCCH-type containing 11A
LOC148413	NA
CPSF2	cleavage and polyadenylation specific factor 2
LINC01770	long intergenic non-protein coding RNA 1770
PCBP3	poly(rC) binding protein 3
ADD2	adducin 2
CELF2	CUGBP Elav-like family member 2
TIAL1	TIA1 cytotoxic granule associated RNA binding protein like 1
ZNF248	zinc finger protein 248
NRXN1	neurexin 1
NTPCR	nucleoside-triphosphatase, cancer-related
TTYH2	tweety family member 2
PACSIN2	protein kinase C and casein kinase substrate in neurons 2
MITF	melanocyte inducing transcription factor
NEIL1	nei like DNA glycosylase 1
RCBTB1	RCC1 and BTB domain containing protein 1
TGDS	TDP-glucose 4,6-dehydratase
WDR20	WD repeat domain 20
LCMT2	leucine carboxyl methyltransferase 2
C2CD5	C2 calcium dependent domain containing 5
PCNX2	pecanex 2
JAKMIP2	janus kinase and microtubule interacting protein 2
ZNF623	zinc finger protein 623
ELMO1	engulfment and cell motility 1
DNAJC1	DnaJ heat shock protein family (Hsp40) member C1
TESPA1	thymocyte expressed, positive selection associated 1
RUSC2	RUN and SH3 domain containing 2
EPM2AIP1	EPM2A interacting protein 1
CDK11A	cyclin dependent kinase 11A
AP3D1	adaptor related protein complex 3 subunit delta 1
SP110	SP110 nuclear body protein
HNRNPAB	heterogeneous nuclear ribonucleoprotein A/B
IDI1	isopentenyl-diphosphate delta isomerase 1
HUS1	HUS1 checkpoint clamp component
FOXA3	forkhead box A3
HSF2	heat shock transcription factor 2
AMPD2	adenosine monophosphate deaminase 2
USP6	ubiquitin specific peptidase 6
AGFG1	ArfGAP with FG repeats 1
MED27	mediator complex subunit 27
UXS1	UDP-glucuronate decarboxylase 1
YME1L1	YME1 like 1 ATPase
MND1	meiotic nuclear divisions 1
ERLIN1	ER lipid raft associated 1
SH2D3C	SH2 domain containing 3C
NBL1	NBL1, DAN family BMP antagonist
AP4B1	adaptor related protein complex 4 subunit beta 1
ZNF821	zinc finger protein 821
PRKCZ-AS1	PRKCZ antisense RNA 1
MORF4L2	mortality factor 4 like 2
SHMT1	serine hydroxymethyltransferase 1
FAAP20	FA core complex associated protein 20
PEX5L	peroxisomal biogenesis factor 5 like
LOC100129534	small nuclear ribonucleoprotein polypeptide N pseudogene
MORN1	MORN repeat containing 1
INSC	INSC spindle orientation adaptor protein
AEBP1	AE binding protein 1
TNF	tumor necrosis factor
PLEK	pleckstrin
MAL	mal, T cell differentiation protein
ADSS	NA
DTYMK	deoxythymidylate kinase
CLCN4	chloride voltage-gated channel 4
GTDC1	glycosyltransferase like domain containing 1
URI1	URI1 prefoldin like chaperone
SLC13A2	solute carrier family 13 member 2
ST18	ST18 C2H2C-type zinc finger transcription factor
TBC1D2B	TBC1 domain family member 2B
NPDC1	neural proliferation, differentiation and control 1
ANAPC13	anaphase promoting complex subunit 13
YIPF3	Yip1 domain family member 3
DYNC1LI2	dynein cytoplasmic 1 light intermediate chain 2
C9orf64	chromosome 9 open reading frame 64
MPZL3	myelin protein zero like 3
BPNT1	3'(2'), 5'-bisphosphate nucleotidase 1
DUSP8	dual specificity phosphatase 8
DUSP2	dual specificity phosphatase 2
BANK1	B cell scaffold protein with ankyrin repeats 1
LRP10	LDL receptor related protein 10
TRDMT1	tRNA aspartic acid methyltransferase 1
DYNC1I1	dynein cytoplasmic 1 intermediate chain 1
DDX11	DEAD/H-box helicase 11
ARHGEF7	Rho guanine nucleotide exchange factor 7
DDX10	DEAD-box helicase 10
IGSF11	immunoglobulin superfamily member 11
DGCR5	DiGeorge syndrome critical region gene 5
RN7SL1	RNA component of signal recognition particle 7SL1
FAM49B	family with sequence similarity 49 member B
DNAJC10	DnaJ heat shock protein family (Hsp40) member C10
NETO1	neuropilin and tolloid like 1
KDM4C	lysine demethylase 4C
ADAM28	ADAM metallopeptidase domain 28
PCYT1B	phosphate cytidylyltransferase 1, choline, beta
EGFL7	EGF like domain multiple 7
ERI1	exoribonuclease 1
DYNC1I2	dynein cytoplasmic 1 intermediate chain 2
NMI	N-myc and STAT interactor
MTMR4	myotubularin related protein 4
ARSG	arylsulfatase G
HTR7	5-hydroxytryptamine receptor 7
HTR6	5-hydroxytryptamine receptor 6
LOC102724450	uncharacterized LOC102724450
PTK2	protein tyrosine kinase 2
PLBD2	phospholipase B domain containing 2
FUT11	fucosyltransferase 11
ZNF596	zinc finger protein 596
GTF2IRD2	GTF2I repeat domain containing 2
CLEC4F	C-type lectin domain family 4 member F
C18orf54	chromosome 18 open reading frame 54
SPIB	Spi-B transcription factor
RFXANK	regulatory factor X associated ankyrin containing protein
CDK13	cyclin dependent kinase 13
SLC1A5	solute carrier family 1 member 5
CCSER1	coiled-coil serine rich protein 1
USP27X	ubiquitin specific peptidase 27 X-linked
SNX20	sorting nexin 20
SF3A3	splicing factor 3a subunit 3
WDR54	WD repeat domain 54
OGFOD1	2-oxoglutarate and iron dependent oxygenase domain containing 1
MAGED1	MAGE family member D1
CAND2	cullin associated and neddylation dissociated 2 (putative)
KDM2A	lysine demethylase 2A
RABL2B	RAB, member of RAS oncogene family like 2B
NR4A3	nuclear receptor subfamily 4 group A member 3
AP4S1	adaptor related protein complex 4 subunit sigma 1
WDR45	WD repeat domain 45
CORO1A	coronin 1A
HHLA2	HERV-H LTR-associating 2
MCRIP2	MAPK regulated corepressor interacting protein 2
SNORC	secondary ossification center associated regulator of chondrocyte maturation
CMC1	C-X9-C motif containing 1
MAPK8	mitogen-activated protein kinase 8
EPB41L5	erythrocyte membrane protein band 4.1 like 5
C15orf54	chromosome 15 open reading frame 54 (putative)
TIMELESS	timeless circadian regulator
LAIR1	leukocyte associated immunoglobulin like receptor 1
BLACAT1	bladder cancer associated transcript 1
HDAC9	histone deacetylase 9
SPHK2	sphingosine kinase 2
DDR1	discoidin domain receptor tyrosine kinase 1
DOCK8	dedicator of cytokinesis 8
SENP1	SUMO specific peptidase 1
FBXW10	F-box and WD repeat domain containing 10
TRIM69	tripartite motif containing 69
STX18	syntaxin 18
ITSN1	intersectin 1
VAX1	ventral anterior homeobox 1
GNE	glucosamine (UDP-N-acetyl)-2-epimerase/N-acetylmannosamine kinase
HCCS	holocytochrome c synthase
SPRED2	sprouty related EVH1 domain containing 2
NDRG2	NDRG family member 2
LOC102724552	NA
SNORD128	small nucleolar RNA, C/D box 128
ABRAXAS1	abraxas 1, BRCA1 A complex subunit
MAPK9	mitogen-activated protein kinase 9
ARID5A	AT-rich interaction domain 5A
MIR6728	microRNA 6728
ENO1-AS1	ENO1 antisense RNA 1
ZNF438	zinc finger protein 438
CACFD1	calcium channel flower domain containing 1
NAP1L4	nucleosome assembly protein 1 like 4
TLR6	toll like receptor 6
AKR1A1	aldo-keto reductase family 1 member A1
ST8SIA5	ST8 alpha-N-acetyl-neuraminide alpha-2,8-sialyltransferase 5
LSR	lipolysis stimulated lipoprotein receptor
ATL1	atlastin GTPase 1
ABHD17B	abhydrolase domain containing 17B
MIR34AHG	MIR34A host gene
LINC01759	NA
EPB41L1	erythrocyte membrane protein band 4.1 like 1
LOC100506022	NA
SCYL2	SCY1 like pseudokinase 2
GOSR2	golgi SNAP receptor complex member 2
PIK3CD-AS1	PIK3CD antisense RNA 1
PIK3CD-AS2	PIK3CD antisense RNA 2
TRAF1	TNF receptor associated factor 1
FAM193B	family with sequence similarity 193 member B
MIA2	MIA SH3 domain ER export factor 2
BCL2L11	BCL2 like 11
ZNF559	zinc finger protein 559
CCNI2	cyclin I family member 2
FGD4	FYVE, RhoGEF and PH domain containing 4
GLYR1	glyoxylate reductase 1 homolog
JAK2	Janus kinase 2
SAP130	Sin3A associated protein 130
RIPPLY3	ripply transcriptional repressor 3
AURKAIP1	aurora kinase A interacting protein 1
CD59	CD59 molecule (CD59 blood group)
LRRC31	leucine rich repeat containing 31
KCNJ15	potassium inwardly rectifying channel subfamily J member 15
GAB2	GRB2 associated binding protein 2
ACTL6A	actin like 6A
SNX24	sorting nexin 24
IL15	interleukin 15
SLC34A1	solute carrier family 34 member 1
CDON	cell adhesion associated, oncogene regulated
CENPS	centromere protein S
CCDC103	coiled-coil domain containing 103
CTNNA3	catenin alpha 3
PPP1R15A	protein phosphatase 1 regulatory subunit 15A
EDC4	enhancer of mRNA decapping 4
RUSC1	RUN and SH3 domain containing 1
BRD7	bromodomain containing 7
HSD11B1L	hydroxysteroid 11-beta dehydrogenase 1 like
USH2A	usherin
LOC105376736	NA
PCMTD1	protein-L-isoaspartate (D-aspartate) O-methyltransferase domain containing 1
TMEM218	transmembrane protein 218
TRAPPC3	trafficking protein particle complex 3
TFPI2	tissue factor pathway inhibitor 2
SLC25A10	solute carrier family 25 member 10
MTOR-AS1	MTOR antisense RNA 1
CHD1L	chromodomain helicase DNA binding protein 1 like
BAG3	BCL2 associated athanogene 3
SLC25A27	solute carrier family 25 member 27
UCA1	urothelial cancer associated 1
MSTO2P	misato family member 2, pseudogene
EML2	EMAP like 2
SCN1A	sodium voltage-gated channel alpha subunit 1
SERPINB8	serpin family B member 8
NPPA-AS1	NPPA antisense RNA 1
CEP70	centrosomal protein 70
WTAP	WT1 associated protein
USP19	ubiquitin specific peptidase 19
GCDH	glutaryl-CoA dehydrogenase
ELP2	elongator acetyltransferase complex subunit 2
UBE2F	ubiquitin conjugating enzyme E2 F (putative)
GAPVD1	GTPase activating protein and VPS9 domains 1
PSMD1	proteasome 26S subunit, non-ATPase 1
HDAC7	histone deacetylase 7
BEST1	bestrophin 1
UXT	ubiquitously expressed prefoldin like chaperone
UCHL1	ubiquitin C-terminal hydrolase L1
PLSCR4	phospholipid scramblase 4
MIR6730	microRNA 6730
PCID2	PCI domain containing 2
RUVBL1	RuvB like AAA ATPase 1
DUSP23	dual specificity phosphatase 23
TTC13	tetratricopeptide repeat domain 13
LRRN3	leucine rich repeat neuronal 3
MLF1	myeloid leukemia factor 1
PRRC2A	proline rich coiled-coil 2A
APBA2	amyloid beta precursor protein binding family A member 2
CFAP97D1	CFAP97 domain containing 1
UBE2H	ubiquitin conjugating enzyme E2 H
TMEM51	transmembrane protein 51
LENG9	leukocyte receptor cluster member 9
LRRFIP2	LRR binding FLII interacting protein 2
IFNAR2	interferon alpha and beta receptor subunit 2
SFXN5	sideroflexin 5
NAF1	nuclear assembly factor 1 ribonucleoprotein
TEX261	testis expressed 261
L3HYPDH	trans-L-3-hydroxyproline dehydratase
GLMP	glycosylated lysosomal membrane protein
DNAJC16	DnaJ heat shock protein family (Hsp40) member C16
44441	NA
EED	embryonic ectoderm development
PRKN	parkin RBR E3 ubiquitin protein ligase
ENOX2	ecto-NOX disulfide-thiol exchanger 2
STK25	serine/threonine kinase 25
VAT1	vesicle amine transport 1
SYNCRIP	synaptotagmin binding cytoplasmic RNA interacting protein
FLJ37453	uncharacterized LOC729614
AP2M1	adaptor related protein complex 2 subunit mu 1
FBRSL1	fibrosin like 1
KCP	kielin cysteine rich BMP regulator
FLNB	filamin B
TFDP2	transcription factor Dp-2
RAD17	RAD17 checkpoint clamp loader component
TESK1	testis associated actin remodelling kinase 1
MYO18B	myosin XVIIIB
GRB10	growth factor receptor bound protein 10
DDX59	DEAD-box helicase 59
FBXW7	F-box and WD repeat domain containing 7
ARL3	ADP ribosylation factor like GTPase 3
TNFSF14	TNF superfamily member 14
ABCB7	ATP binding cassette subfamily B member 7
RIPK1	receptor interacting serine/threonine kinase 1
PIGA	phosphatidylinositol glycan anchor biosynthesis class A
YIF1A	Yip1 interacting factor homolog A, membrane trafficking protein
ABO	ABO, alpha 1-3-N-acetylgalactosaminyltransferase and alpha 1-3-galactosyltransferase
WDR4	WD repeat domain 4
NLRP4	NLR family pyrin domain containing 4
CD99L2	CD99 molecule like 2
PPFIBP1	PPFIA binding protein 1
TMEM209	transmembrane protein 209
KLHDC10	kelch domain containing 10
LINC01783	long intergenic non-protein coding RNA 1783
PROM2	prominin 2
CCDC181	coiled-coil domain containing 181
PPP3CB	protein phosphatase 3 catalytic subunit beta
CROCCP2	CROCC pseudogene 2
MST1P2	macrophage stimulating 1 pseudogene 2
ESPNP	espin pseudogene
PKIG	cAMP-dependent protein kinase inhibitor gamma
WDR6	WD repeat domain 6
OSBPL1A	oxysterol binding protein like 1A
SBNO2	strawberry notch homolog 2
EBP	EBP cholestenol delta-isomerase
ZNF22	zinc finger protein 22
ZNF182	zinc finger protein 182
KHDRBS3	KH RNA binding domain containing, signal transduction associated 3
DMRT2	doublesex and mab-3 related transcription factor 2
ZNF19	zinc finger protein 19
ZNF17	zinc finger protein 17
KPTN	kaptin, actin binding protein
CAPN11	calpain 11
ZWINT	ZW10 interacting kinetochore protein
KIF2C	kinesin family member 2C
PPARGC1A	PPARG coactivator 1 alpha
TP53I11	tumor protein p53 inducible protein 11
INVS	inversin
ELP1	elongator complex protein 1
LRRC63	leucine rich repeat containing 63
TFG	trafficking from ER to golgi regulator
OPRM1	opioid receptor mu 1
LINC01521	long intergenic non-protein coding RNA 1521
BICD1	BICD cargo adaptor 1
P2RX4	purinergic receptor P2X 4
UBL7-AS1	UBL7 antisense RNA 1 (head to head)
DLGAP1-AS2	DLGAP1 antisense RNA 2
FER1L4	fer-1 like family member 4 (pseudogene)
FUT8	fucosyltransferase 8
APOE	apolipoprotein E
SPATA31C2	SPATA31 subfamily C member 2
ATP5MC2	ATP synthase membrane subunit c locus 2
ZNF565	zinc finger protein 565
UBAC1	UBA domain containing 1
C20orf194	chromosome 20 open reading frame 194
NOX5	NADPH oxidase 5
ING4	inhibitor of growth family member 4
THAP11	THAP domain containing 11
SPRYD7	SPRY domain containing 7
ADGRG6	adhesion G protein-coupled receptor G6
ATP10D	ATPase phospholipid transporting 10D (putative)
LOC101927895	NA
SEC14L1	SEC14 like lipid binding 1
BSDC1	BSD domain containing 1
AGAP5	ArfGAP with GTPase domain, ankyrin repeat and PH domain 5
ODC1	ornithine decarboxylase 1
AKR7L	aldo-keto reductase family 7 like (gene/pseudogene)
RXRG	retinoid X receptor gamma
LOC100506730	uncharacterized LOC100506730
CAPG	capping actin protein, gelsolin like
MYO1A	myosin IA
CACNA1F	calcium voltage-gated channel subunit alpha1 F
ZNF140	zinc finger protein 140
PQLC2	NA
NLRP2	NLR family pyrin domain containing 2
CXorf40A	chromosome X open reading frame 40A
NCOA4	nuclear receptor coactivator 4
NUDT16	nudix hydrolase 16
ABCG2	ATP binding cassette subfamily G member 2 (Junior blood group)
LOC105378614	uncharacterized LOC105378614
PPP1R18	protein phosphatase 1 regulatory subunit 18
MINOS1	NA
POLR2C	RNA polymerase II subunit C
M1AP	meiosis 1 associated protein
ZFAND2B	zinc finger AN1-type containing 2B
LEO1	LEO1 homolog, Paf1/RNA polymerase II complex component
GALM	galactose mutarotase
PIH1D2	PIH1 domain containing 2
TRIM43	tripartite motif containing 43
TMEM45B	transmembrane protein 45B
LDHAL6A	lactate dehydrogenase A like 6A
NRDC	nardilysin convertase
KLF8	Kruppel like factor 8
FHL1	four and a half LIM domains 1
MAP7	microtubule associated protein 7
PDE4DIP	phosphodiesterase 4D interacting protein
MAGI3	membrane associated guanylate kinase, WW and PDZ domain containing 3
PTK7	protein tyrosine kinase 7 (inactive)
C4orf33	chromosome 4 open reading frame 33
TSHZ2	teashirt zinc finger homeobox 2
PINK1-AS	PINK1 antisense RNA
CENPX	centromere protein X
CDC27	cell division cycle 27
CEP97	centrosomal protein 97
C8orf59	NA
DARS	NA
CHN2	chimerin 2
TMEM14B	transmembrane protein 14B
CACNA1C	calcium voltage-gated channel subunit alpha1 C
PDCD2	programmed cell death 2
BRD2	bromodomain containing 2
LOC100506801	NA
UBAC2	UBA domain containing 2
GSKIP	GSK3B interacting protein
TCF12	transcription factor 12
CLPTM1L	CLPTM1 like
GHDC	GH3 domain containing
PLPP5	phospholipid phosphatase 5
NRBF2	nuclear receptor binding factor 2
S1PR5	sphingosine-1-phosphate receptor 5
TCF7L2	transcription factor 7 like 2
MRPL36	mitochondrial ribosomal protein L36
MRPL38	mitochondrial ribosomal protein L38
MRPL41	mitochondrial ribosomal protein L41
MRPS6	mitochondrial ribosomal protein S6
PKIB	cAMP-dependent protein kinase inhibitor beta
ASPH	aspartate beta-hydroxylase
PRKCQ	protein kinase C theta
GOLGA6L3	golgin A6 family like 3
NPIPB4	nuclear pore complex interacting protein family member B4
KIFC3	kinesin family member C3
BEND6	BEN domain containing 6
MON2	MON2 homolog, regulator of endosome-to-Golgi trafficking
R3HDM2	R3H domain containing 2
MYT1L	myelin transcription factor 1 like
DAPK2	death associated protein kinase 2
XPO7	exportin 7
TGIF1	TGFB induced factor homeobox 1
C9orf43	chromosome 9 open reading frame 43
CRNKL1	crooked neck pre-mRNA splicing factor 1
LINC01635	long intergenic non-protein coding RNA 1635
FUOM	fucose mutarotase
IL16	interleukin 16
PRR18	proline rich 18
CARHSP1	calcium regulated heat stable protein 1
ASNS	asparagine synthetase (glutamine-hydrolyzing)
IL1RL1	interleukin 1 receptor like 1
IL18R1	interleukin 18 receptor 1
RBL2	RB transcriptional corepressor like 2
MAPT	microtubule associated protein tau
RNASEH1	ribonuclease H1
CTSH	cathepsin H
ADSL	adenylosuccinate lyase
NFIL3	nuclear factor, interleukin 3 regulated
NDUFV1	NADH:ubiquinone oxidoreductase core subunit V1
MPDZ	multiple PDZ domain crumbs cell polarity complex component
CADM1	cell adhesion molecule 1
ANKRD2	ankyrin repeat domain 2
TMEM272	transmembrane protein 272
UNKL	unk like zinc finger
OGDHL	oxoglutarate dehydrogenase like
LINC01355	long intergenic non-protein coding RNA 1355
TP73	tumor protein p73
TMBIM6	transmembrane BAX inhibitor motif containing 6
MYB	MYB proto-oncogene, transcription factor
CXCR2	C-X-C motif chemokine receptor 2
SCG3	secretogranin III
CREM	cAMP responsive element modulator
PLA2G6	phospholipase A2 group VI
ZNF436-AS1	ZNF436 antisense RNA 1
INPP5J	inositol polyphosphate-5-phosphatase J
HACE1	HECT domain and ankyrin repeat containing E3 ubiquitin protein ligase 1
TOB1	transducer of ERBB2, 1
TRA2B	transformer 2 beta homolog
KIAA0586	KIAA0586
ELOA-AS1	ELOA antisense RNA 1
ETV2	ETS variant transcription factor 2
FAM98A	family with sequence similarity 98 member A
EPHA4	EPH receptor A4
RABL2A	RAB, member of RAS oncogene family like 2A
SMUG1	single-strand-selective monofunctional uracil-DNA glycosylase 1
CAMK2D	calcium/calmodulin dependent protein kinase II delta
KRBOX4	KRAB box domain containing 4
SYCE1	synaptonemal complex central element protein 1
SYNRG	synergin gamma
CHRDL2	chordin like 2
RIMS2	regulating synaptic membrane exocytosis 2
PIGX	phosphatidylinositol glycan anchor biosynthesis class X
C1orf56	chromosome 1 open reading frame 56
TIPIN	TIMELESS interacting protein
SSH3	slingshot protein phosphatase 3
GEMIN8	gem nuclear organelle associated protein 8
TMEM160	transmembrane protein 160
BTG3	BTG anti-proliferation factor 3
EHD1	EH domain containing 1
HNRNPA0	heterogeneous nuclear ribonucleoprotein A0
GPR75	G protein-coupled receptor 75
TADA3	transcriptional adaptor 3
AP3M2	adaptor related protein complex 3 subunit mu 2
RIBC2	RIB43A domain with coiled-coils 2
KDELR1	KDEL endoplasmic reticulum protein retention receptor 1
MORF4L1	mortality factor 4 like 1
SENP6	SUMO specific peptidase 6
HERC4	HECT and RLD domain containing E3 ubiquitin protein ligase 4
SNAP29	synaptosome associated protein 29
TCEAL1	transcription elongation factor A like 1
CNOT8	CCR4-NOT transcription complex subunit 8
CEBPA	CCAAT enhancer binding protein alpha
CEACAM5	CEA cell adhesion molecule 5
B4GALT6	beta-1,4-galactosyltransferase 6
RUNX3	RUNX family transcription factor 3
CASP3	caspase 3
CNKSR1	connector enhancer of kinase suppressor of Ras 1
RCAN3AS	RCAN3 antisense RNA
TBX20	T-box transcription factor 20
NEK6	NIMA related kinase 6
ANKMY1	ankyrin repeat and MYND domain containing 1
ABHD10	abhydrolase domain containing 10
SLC35C2	solute carrier family 35 member C2
NRF1	nuclear respiratory factor 1
MIR6731	microRNA 6731
MIR4425	microRNA 4425
PLIN1	perilipin 1
POLR2I	RNA polymerase II subunit I
RSRP1	arginine and serine rich protein 1
C3orf52	chromosome 3 open reading frame 52
TBC1D15	TBC1 domain family member 15
PODNL1	podocan like 1
TSC1	TSC complex subunit 1
CYSLTR1	cysteinyl leukotriene receptor 1
PDXDC1	pyridoxal dependent decarboxylase domain containing 1
ABLIM1	actin binding LIM protein 1
VPS50	VPS50 subunit of EARP/GARPII complex
MRPL52	mitochondrial ribosomal protein L52
IL21R	interleukin 21 receptor
LOC646471	uncharacterized LOC646471
FN1	fibronectin 1
AIMP1	aminoacyl tRNA synthetase complex interacting multifunctional protein 1
MRVI1	murine retrovirus integration site 1 homolog
TARS2	threonyl-tRNA synthetase 2, mitochondrial
SLFN5	schlafen family member 5
KRT10	keratin 10
ITGA2B	integrin subunit alpha 2b
LOC101928303	NA
NUP210L	nucleoporin 210 like
MBNL1	muscleblind like splicing regulator 1
KIF5C	kinesin family member 5C
STOX1	storkhead box 1
TBC1D17	TBC1 domain family member 17
DYNC2H1	dynein cytoplasmic 2 heavy chain 1
NFATC1	nuclear factor of activated T cells 1
LOC101928324	NA
ZNF138	zinc finger protein 138
AZI2	5-azacytidine induced 2
THADA	THADA armadillo repeat containing
LOC101928728	uncharacterized LOC101928728
KLK10	kallikrein related peptidase 10
C2orf81	chromosome 2 open reading frame 81
PHYH	phytanoyl-CoA 2-hydroxylase
DCLRE1C	DNA cross-link repair 1C
ROBO3	roundabout guidance receptor 3
DTNB	dystrobrevin beta
MAP3K9	mitogen-activated protein kinase kinase kinase 9
CALD1	caldesmon 1
ACTG1P20	actin gamma 1 pseudogene 20
TOM1	target of myb1 membrane trafficking protein
AGBL3	ATP/GTP binding protein like 3
WDR27	WD repeat domain 27
BIRC5	baculoviral IAP repeat containing 5
RGS14	regulator of G protein signaling 14
GAS2L1	growth arrest specific 2 like 1
RASL10A	RAS like family 10 member A
RBM12	RNA binding motif protein 12
MT1A	metallothionein 1A
CD200	CD200 molecule
HDAC6	histone deacetylase 6
TAF6L	TATA-box binding protein associated factor 6 like
MYL12A	myosin light chain 12A
IVNS1ABP	influenza virus NS1A binding protein
POLR3C	RNA polymerase III subunit C
POLR3F	RNA polymerase III subunit F
ARID3B	AT-rich interaction domain 3B
GRAMD4	GRAM domain containing 4
FRMD4B	FERM domain containing 4B
SCARNA1	small Cajal body-specific RNA 1
MMP2	matrix metallopeptidase 2
C15orf40	chromosome 15 open reading frame 40
SLC12A9	solute carrier family 12 member 9
HAVCR1	hepatitis A virus cellular receptor 1
C12orf57	chromosome 12 open reading frame 57
PISD	phosphatidylserine decarboxylase
EYA3	EYA transcriptional coactivator and phosphatase 3
TOR1AIP2	torsin 1A interacting protein 2
DTNA	dystrobrevin alpha
SEC22C	SEC22 homolog C, vesicle trafficking protein
C7orf50	chromosome 7 open reading frame 50
SNHG3	small nucleolar RNA host gene 3
INTS10	integrator complex subunit 10
SNORA73B	small nucleolar RNA, H/ACA box 73B
KIF27	kinesin family member 27
LMBRD1	LMBR1 domain containing 1
C12orf4	chromosome 12 open reading frame 4
EDA2R	ectodysplasin A2 receptor
SNORD99	small nucleolar RNA, C/D box 99
SNORA44	small nucleolar RNA, H/ACA box 44
SNORA16A	small nucleolar RNA, H/ACA box 16A
GTF2H4	general transcription factor IIH subunit 4
LINC01715	long intergenic non-protein coding RNA 1715
KPNA2	karyopherin subunit alpha 2
B3GALNT1	beta-1,3-N-acetylgalactosaminyltransferase 1 (globoside blood group)
ICAM3	intercellular adhesion molecule 3
APOBEC3C	apolipoprotein B mRNA editing enzyme catalytic subunit 3C
BAG6	BCL2 associated athanogene 6
PTBP3	polypyrimidine tract binding protein 3
ITPA	inosine triphosphatase
CNNM1	cyclin and CBS domain divalent metal cation transport mediator 1
VWA3B	von Willebrand factor A domain containing 3B
KIF13A	kinesin family member 13A
MIR4420	microRNA 4420
DGLUCY	D-glutamate cyclase
ARMT1	acidic residue methyltransferase 1
THBS4	thrombospondin 4
PCDHGB6	protocadherin gamma subfamily B, 6
SNORD103C	small nucleolar RNA, C/D box 103C
GGA3	golgi associated, gamma adaptin ear containing, ARF binding protein 3
MYO6	myosin VI
NR2C2AP	nuclear receptor 2C2 associated protein
CD36	CD36 molecule
ZNF174	zinc finger protein 174
ZNF169	zinc finger protein 169
ZNF165	zinc finger protein 165
ZNF157	zinc finger protein 157
CNTN5	contactin 5
NKX2-8	NK2 homeobox 8
PITPNM3	PITPNM family member 3
SNCA	synuclein alpha
SNX13	sorting nexin 13
PCNX3	pecanex 3
MINDY4	MINDY lysine 48 deubiquitinase 4
PTTG1	PTTG1 regulator of sister chromatid separation, securin
HLA-A	major histocompatibility complex, class I, A
TMEM234	transmembrane protein 234
FGF1	fibroblast growth factor 1
GPD1	glycerol-3-phosphate dehydrogenase 1
MTMR9LP	myotubularin related protein 9 like, pseudogene
PFKP	phosphofructokinase, platelet
RPLP0	ribosomal protein lateral stalk subunit P0
HMBOX1	homeobox containing 1
ACBD4	acyl-CoA binding domain containing 4
HNF1B	HNF1 homeobox B
SLC26A5	solute carrier family 26 member 5
SLC4A10	solute carrier family 4 member 10
CDC45	cell division cycle 45
ATG7	autophagy related 7
RNASEH2A	ribonuclease H2 subunit A
TFF1	trefoil factor 1
TFAP4	transcription factor AP-4
PPP2R1B	protein phosphatase 2 scaffold subunit Abeta
PPP2CA	protein phosphatase 2 catalytic subunit alpha
TEF	TEF transcription factor, PAR bZIP family member
PPP1CC	protein phosphatase 1 catalytic subunit gamma
S100PBP	S100P binding protein
ANKS1B	ankyrin repeat and sterile alpha motif domain containing 1B
ACACB	acetyl-CoA carboxylase beta
ITCH	itchy E3 ubiquitin protein ligase
WAS	WASP actin nucleation promoting factor
VDR	vitamin D receptor
UROD	uroporphyrinogen decarboxylase
TSHR	thyroid stimulating hormone receptor
MARCKSL1	MARCKS like 1
DRAM2	DNA damage regulated autophagy modulator 2
RASAL1	RAS protein activator like 1
PPP1R3B	protein phosphatase 1 regulatory subunit 3B
TOR2A	torsin family 2 member A
ALAD	aminolevulinate dehydratase
SLC12A7	solute carrier family 12 member 7
LMBR1L	limb development membrane protein 1 like
ZNF415	zinc finger protein 415
HNRNPM	heterogeneous nuclear ribonucleoprotein M
TUBAL3	tubulin alpha like 3
FAM57A	NA
PDZD3	PDZ domain containing 3
CDC14A	cell division cycle 14A
B3GNT9	UDP-GlcNAc:betaGal beta-1,3-N-acetylglucosaminyltransferase 9
LOC653160	uncharacterized LOC653160
TMEM35B	transmembrane protein 35B
EXO1	exonuclease 1
CAMKK2	calcium/calmodulin dependent protein kinase kinase 2
ARNTL	aryl hydrocarbon receptor nuclear translocator like
ZNF888	zinc finger protein 888
BHMG1	basic helix-loop-helix and HMG-box containing 1
UCK1	uridine-cytidine kinase 1
GIMAP2	GTPase, IMAP family member 2
NOC2L	NOC2 like nucleolar associated transcriptional repressor
JMJD6	jumonji domain containing 6, arginine demethylase and lysine hydroxylase
TRIM9	tripartite motif containing 9
ARL6IP1	ADP ribosylation factor like GTPase 6 interacting protein 1
KANK1	KN motif and ankyrin repeat domains 1
MESD	mesoderm development LRP chaperone
SIDT1	SID1 transmembrane family member 1
AGO4	argonaute RISC component 4
TMEM126B	transmembrane protein 126B
LAG3	lymphocyte activating 3
KRT83	keratin 83
NSD2	nuclear receptor binding SET domain protein 2
VCAM1	vascular cell adhesion molecule 1
UBA52	ubiquitin A-52 residue ribosomal protein fusion product 1
EVA1B	eva-1 homolog B
SRF	serum response factor
KLF13	Kruppel like factor 13
CAMK4	calcium/calmodulin dependent protein kinase IV
SNRPN	small nuclear ribonucleoprotein polypeptide N
RACGAP1	Rac GTPase activating protein 1
PLPPR3	phospholipid phosphatase related 3
L1CAM	L1 cell adhesion molecule
GAS2	growth arrest specific 2
RPL6	ribosomal protein L6
DPP8	dipeptidyl peptidase 8
MIR5581	microRNA 5581
NEPRO	nucleolus and neural progenitor protein
JAK1	Janus kinase 1
TANGO2	transport and golgi organization 2 homolog
ACER3	alkaline ceramidase 3
RTN4	reticulon 4
PCDH9	protocadherin 9
AACS	acetoacetyl-CoA synthetase
DMAC2	distal membrane arm assembly complex 2
DUSP13	dual specificity phosphatase 13
CAPRIN2	caprin family member 2
TMEM183B	transmembrane protein 183B
ZER1	zyg-11 related cell cycle regulator
GDI2	GDP dissociation inhibitor 2
ELK4	ETS transcription factor ELK4
DDX20	DEAD-box helicase 20
AKAP10	A-kinase anchoring protein 10
A4GALT	alpha 1,4-galactosyltransferase (P blood group)
SALL4	spalt like transcription factor 4
TAOK3	TAO kinase 3
MYCBP	MYC binding protein
LOC105378663	uncharacterized LOC105378663
CCDC138	coiled-coil domain containing 138
ARMCX2	armadillo repeat containing X-linked 2
SLC25A14	solute carrier family 25 member 14
SLC29A1	solute carrier family 29 member 1 (Augustine blood group)
KIAA0754	KIAA0754
TRPM2	transient receptor potential cation channel subfamily M member 2
OXCT2P1	3-oxoacid CoA-transferase 2 pseudogene 1
PPIEL	peptidylprolyl isomerase E like pseudogene
KARS	NA
ARRB2	arrestin beta 2
LOC101929516	NA
C10orf128	NA
TRIR	telomerase RNA component interacting RNase
PCM1	pericentriolar material 1
PAWR	pro-apoptotic WT1 regulator
MTMR1	myotubularin related protein 1
MTRF1	mitochondrial translation release factor 1
GPRC5B	G protein-coupled receptor class C group 5 member B
LOC101929536	uncharacterized LOC101929536
BCAR1	BCAR1 scaffold protein, Cas family member
MAGI2-AS3	MAGI2 antisense RNA 3
ZNF345	zinc finger protein 345
LINC00640	long intergenic non-protein coding RNA 640
MLH1	mutL homolog 1
LINC00487	long intergenic non-protein coding RNA 487
LINC00837	long intergenic non-protein coding RNA 837
DCAF11	DDB1 and CUL4 associated factor 11
ZRANB2-AS1	ZRANB2 antisense RNA 1
LINC00941	long intergenic non-protein coding RNA 941
MKNK1-AS1	MKNK1 antisense RNA 1
LINC00886	long intergenic non-protein coding RNA 886
LINC00865	long intergenic non-protein coding RNA 865
TSC22D1-AS1	TSC22D1 antisense RNA 1
BCL2L12	BCL2 like 12
RPL34	ribosomal protein L34
KIAA0040	KIAA0040
ALG9	ALG9 alpha-1,2-mannosyltransferase
PGAP3	post-GPI attachment to proteins phospholipase 3
ZNF112	zinc finger protein 112
PDE1B	phosphodiesterase 1B
PPM1L	protein phosphatase, Mg2+/Mn2+ dependent 1L
ITGA6	integrin subunit alpha 6
VWF	von Willebrand factor
DNPEP	aspartyl aminopeptidase
MPP2	membrane palmitoylated protein 2
POLDIP2	DNA polymerase delta interacting protein 2
COLGALT1	collagen beta(1-O)galactosyltransferase 1
LSM14A	LSM14A mRNA processing body assembly factor
RAI14	retinoic acid induced 14
ERC2	ELKS/RAB6-interacting/CAST family member 2
ARID4A	AT-rich interaction domain 4A
TMEM41B	transmembrane protein 41B
ZNF517	zinc finger protein 517
SIPA1L1	signal induced proliferation associated 1 like 1
SLFNL1-AS1	SLFNL1 antisense RNA 1
COG5	component of oligomeric golgi complex 5
HKR1	NA
DNAJA4	DnaJ heat shock protein family (Hsp40) member A4
VAV2	vav guanine nucleotide exchange factor 2
ADGRF3	adhesion G protein-coupled receptor F3
CNTN6	contactin 6
NUP62	nucleoporin 62
RCHY1	ring finger and CHY zinc finger domain containing 1
ATG13	autophagy related 13
RFXAP	regulatory factor X associated protein
USP28	ubiquitin specific peptidase 28
GLE1	GLE1 RNA export mediator
ENPEP	glutamyl aminopeptidase
GNS	glucosamine (N-acetyl)-6-sulfatase
ENO3	enolase 3
GCLC	glutamate-cysteine ligase catalytic subunit
B4GALT1	beta-1,4-galactosyltransferase 1
GFRA2	GDNF family receptor alpha 2
MIR4446	microRNA 4446
STAG3L2	stromal antigen 3-like 2 (pseudogene)
LINC00266-1	long intergenic non-protein coding RNA 266-1
ANKS3	ankyrin repeat and sterile alpha motif domain containing 3
ZNF410	zinc finger protein 410
WWTR1-AS1	WWTR1 antisense RNA 1
SPNS1	sphingolipid transporter 1 (putative)
FAM156A	family with sequence similarity 156 member A
C16orf72	chromosome 16 open reading frame 72
DNAJB9	DnaJ heat shock protein family (Hsp40) member B9
ATAD2	ATPase family AAA domain containing 2
LOC339539	uncharacterized LOC339539
MUC20	mucin 20, cell surface associated
GSK3A	glycogen synthase kinase 3 alpha
MYH7B	myosin heavy chain 7B
CDV3	CDV3 homolog
GAS7	growth arrest specific 7
IL31RA	interleukin 31 receptor A
GFOD1	glucose-fructose oxidoreductase domain containing 1
CMPK1	cytidine/uridine monophosphate kinase 1
APH1A	aph-1 homolog A, gamma-secretase subunit
MED8	mediator complex subunit 8
KIF5B	kinesin family member 5B
KIF2A	kinesin family member 2A
POLR2K	RNA polymerase II subunit K
SZT2-AS1	SZT2 antisense RNA 1
DHRS1	dehydrogenase/reductase 1
ZNF600	zinc finger protein 600
IZUMO1	izumo sperm-egg fusion 1
KDM4A-AS1	KDM4A antisense RNA 1
CHODL	chondrolectin
YY1AP1	YY1 associated protein 1
XPO1	exportin 1
TATDN1	TatD DNase domain containing 1
BCAS1	breast carcinoma amplified sequence 1
MTBP	MDM2 binding protein
ATPAF1	ATP synthase mitochondrial F1 complex assembly factor 1
C16orf58	chromosome 16 open reading frame 58
GABBR1	gamma-aminobutyric acid type B receptor subunit 1
NSD1	nuclear receptor binding SET domain protein 1
NDUFS7	NADH:ubiquinone oxidoreductase core subunit S7
DCTN3	dynactin subunit 3
DCAF10	DDB1 and CUL4 associated factor 10
ASCC2	activating signal cointegrator 1 complex subunit 2
MXI1	MAX interactor 1, dimerization protein
SLC26A7	solute carrier family 26 member 7
RGS3	regulator of G protein signaling 3
TNFRSF18	TNF receptor superfamily member 18
WFDC2	WAP four-disulfide core domain 2
MIR6079	microRNA 6079
TTC39B	tetratricopeptide repeat domain 39B
RASGEF1A	RasGEF domain family member 1A
TAMM41	TAM41 mitochondrial translocator assembly and maintenance homolog
CCDC24	coiled-coil domain containing 24
METTL4	methyltransferase like 4
DLGAP1	DLG associated protein 1
CPNE9	copine family member 9
EDF1	endothelial differentiation related factor 1
TBCC	tubulin folding cofactor C
TCF7	transcription factor 7
SLC8A3	solute carrier family 8 member A3
ANTXR2	ANTXR cell adhesion molecule 2
OLFM3	olfactomedin 3
UBE2J2	ubiquitin conjugating enzyme E2 J2
TSR2	TSR2 ribosome maturation factor
RPL13	ribosomal protein L13
PML	promyelocytic leukemia
NAA15	N(alpha)-acetyltransferase 15, NatA auxiliary subunit
PEX16	peroxisomal biogenesis factor 16
ERI3-IT1	ERI3 intronic transcript 1
SNORA110	small nucleolar RNA, H/ACA box 110
SRPX	sushi repeat containing protein X-linked
PNISR	PNN interacting serine and arginine rich protein
SURF2	surfeit 2
GANAB	glucosidase II alpha subunit
CFAP298	cilia and flagella associated protein 298
PDGFRA	platelet derived growth factor receptor alpha
ME3	malic enzyme 3
RUBCN	rubicon autophagy regulator
KIAA0355	KIAA0355
SNORD55	small nucleolar RNA, C/D box 55
SNORD46	small nucleolar RNA, C/D box 46
SNORD38A	small nucleolar RNA, C/D box 38A
SNORD38B	small nucleolar RNA, C/D box 38B
STS	steroid sulfatase
ZNF133	zinc finger protein 133
KIAA0391	NA
SMG6	SMG6 nonsense mediated mRNA decay factor
PAX2	paired box 2
ARIH2	ariadne RBR E3 ubiquitin protein ligase 2
MTMR14	myotubularin related protein 14
TMEM168	transmembrane protein 168
TMEM267	transmembrane protein 267
ARAP3	ArfGAP with RhoGAP domain, ankyrin repeat and PH domain 3
KLHL25	kelch like family member 25
CDH24	cadherin 24
ZNF350	zinc finger protein 350
GNB4	G protein subunit beta 4
TAF1	TATA-box binding protein associated factor 1
GRM2	glutamate metabotropic receptor 2
PRPF4	pre-mRNA processing factor 4
DHX8	DEAH-box helicase 8
TPM1	tropomyosin 1
NME4	NME/NM23 nucleoside diphosphate kinase 4
NPFF	neuropeptide FF-amide peptide precursor
RTCA	RNA 3'-terminal phosphate cyclase
HLA-G	major histocompatibility complex, class I, G
SKAP1	src kinase associated phosphoprotein 1
SPTA1	spectrin alpha, erythrocytic 1
PSMG1	proteasome assembly chaperone 1
AK2	adenylate kinase 2
AZIN1	antizyme inhibitor 1
VILL	villin like
ZNF593	zinc finger protein 593
VPS13B	vacuolar protein sorting 13 homolog B
CBLB	Cbl proto-oncogene B
LTBP3	latent transforming growth factor beta binding protein 3
PLCH2	phospholipase C eta 2
ITPRIP	inositol 1,4,5-trisphosphate receptor interacting protein
MOK	MOK protein kinase
PDPR	pyruvate dehydrogenase phosphatase regulatory subunit
NUDT12	nudix hydrolase 12
MAGOHB	mago homolog B, exon junction complex subunit
PARPBP	PARP1 binding protein
NSUN4	NOP2/Sun RNA methyltransferase 4
ANKRD6	ankyrin repeat domain 6
FAAHP1	fatty acid amide hydrolase pseudogene 1
POU6F1	POU class 6 homeobox 1
THRB	thyroid hormone receptor beta
CD101	CD101 molecule
YWHAQ	tyrosine 3-monooxygenase/tryptophan 5-monooxygenase activation protein theta
EBNA1BP2	EBNA1 binding protein 2
CYB5R3	cytochrome b5 reductase 3
ATG4D	autophagy related 4D cysteine peptidase
ZNF184	zinc finger protein 184
PITRM1	pitrilysin metallopeptidase 1
SLC35E1	solute carrier family 35 member E1
CNTD2	cyclin N-terminal domain containing 2
FGFR1	fibroblast growth factor receptor 1
SYNPO2L	synaptopodin 2 like
TNIP3	TNFAIP3 interacting protein 3
FHIT	fragile histidine triad diadenosine triphosphatase
PFKFB1	6-phosphofructo-2-kinase/fructose-2,6-biphosphatase 1
POLD1	DNA polymerase delta 1, catalytic subunit
APC	APC regulator of WNT signaling pathway
LINC00441	NA
AKR1E2	aldo-keto reductase family 1 member E2
MEG3	maternally expressed 3
PSD	pleckstrin and Sec7 domain containing
RNF8	ring finger protein 8
CD274	CD274 molecule
C17orf80	chromosome 17 open reading frame 80
SNX17	sorting nexin 17
WDR13	WD repeat domain 13
KRT85	keratin 85
LINC01389	long intergenic non-protein coding RNA 1389
PLA2G4A	phospholipase A2 group IVA
PUS1	pseudouridine synthase 1
KCNQ5	potassium voltage-gated channel subfamily Q member 5
MKRN1	makorin ring finger protein 1
DIS3L	DIS3 like exosome 3'-5' exoribonuclease
SNAP47	synaptosome associated protein 47
FOPNL	FGFR1OP N-terminal like
UROS	uroporphyrinogen III synthase
MAP3K14-AS1	MAP3K14 antisense RNA 1
UPP1	uridine phosphorylase 1
KIAA1191	KIAA1191
DMXL2	Dmx like 2
ZFYVE27	zinc finger FYVE-type containing 27
VEZT	vezatin, adherens junctions transmembrane protein
ADPRH	ADP-ribosylarginine hydrolase
PDK1	pyruvate dehydrogenase kinase 1
LINC01562	long intergenic non-protein coding RNA 1562
TRMT112	tRNA methyltransferase subunit 11-2
UBXN1	UBX domain protein 1
RPA2	replication protein A2
ATP2A1	ATPase sarcoplasmic/endoplasmic reticulum Ca2+ transporting 1
MOV10	Mov10 RISC complex RNA helicase
FLVCR1-AS1	NA
SAE1	SUMO1 activating enzyme subunit 1
SRRM2-AS1	SRRM2 antisense RNA 1
PRDM10	PR/SET domain 10
C2orf27A	chromosome 2 open reading frame 27A
PRCP	prolylcarboxypeptidase
UBOX5	U-box domain containing 5
PRC1	protein regulator of cytokinesis 1
EHMT1	euchromatic histone lysine methyltransferase 1
UBE3A	ubiquitin protein ligase E3A
TRPC4AP	transient receptor potential cation channel subfamily C member 4 associated protein
HDAC2	histone deacetylase 2
ARL13B	ADP ribosylation factor like GTPase 13B
AMZ2	archaelysin family metallopeptidase 2
RBM15	RNA binding motif protein 15
AEN	apoptosis enhancing nuclease
CERK	ceramide kinase
MTHFSD	methenyltetrahydrofolate synthetase domain containing
FNDC3B	fibronectin type III domain containing 3B
RMND5B	required for meiotic nuclear division 5 homolog B
C11orf1	chromosome 11 open reading frame 1
PCED1A	PC-esterase domain containing 1A
C6orf106	NA
DISC1	DISC1 scaffold protein
STAT4	signal transducer and activator of transcription 4
CACNA1B	calcium voltage-gated channel subunit alpha1 B
VARS2	valyl-tRNA synthetase 2, mitochondrial
PATZ1	POZ/BTB and AT hook containing zinc finger 1
POMT1	protein O-mannosyltransferase 1
R3HCC1L	R3H domain and coiled-coil containing 1 like
MAP3K7	mitogen-activated protein kinase kinase kinase 7
DNAH14	dynein axonemal heavy chain 14
IGFBP2	insulin like growth factor binding protein 2
RCBTB2	RCC1 and BTB domain containing protein 2
TSGA10	testis specific 10
WRB	NA
EPB41L2	erythrocyte membrane protein band 4.1 like 2
SLC9A5	solute carrier family 9 member A5
AZIN2	antizyme inhibitor 2
FAM131B	family with sequence similarity 131 member B
TMEM177	transmembrane protein 177
BAG1	BCL2 associated athanogene 1
IL1A	interleukin 1 alpha
RPL19	ribosomal protein L19
HBG1	hemoglobin subunit gamma 1
GDF5	growth differentiation factor 5
SLC1A7	solute carrier family 1 member 7
IDH3B	isocitrate dehydrogenase (NAD(+)) 3 non-catalytic subunit beta
KDM6A	lysine demethylase 6A
LINC01260	long intergenic non-protein coding RNA 1260
LOC100507564	uncharacterized LOC100507564
CAPN14	calpain 14
LINC01771	long intergenic non-protein coding RNA 1771
XPNPEP1	X-prolyl aminopeptidase 1
TNRC6A	trinucleotide repeat containing adaptor 6A
NDC1	NDC1 transmembrane nucleoporin
YIPF1	Yip1 domain family member 1
NR2F1-AS1	NR2F1 antisense RNA 1
HSPB11	heat shock protein family B (small) member 11
CLCN2	chloride voltage-gated channel 2
PGPEP1	pyroglutamyl-peptidase I
SLC30A6	solute carrier family 30 member 6
NOS1AP	nitric oxide synthase 1 adaptor protein
NAGLU	N-acetyl-alpha-glucosaminidase
TCEANC2	transcription elongation factor A N-terminal and central domain containing 2
NAT9	N-acetyltransferase 9 (putative)
RPS6KC1	ribosomal protein S6 kinase C1
RTEL1	regulator of telomere elongation helicase 1
SPEF2	sperm flagellar 2
RNF145	ring finger protein 145
ZMAT2	zinc finger matrin-type 2
NOC4L	nucleolar complex associated 4 homolog
SLC30A5	solute carrier family 30 member 5
TMEM106C	transmembrane protein 106C
XYLT2	xylosyltransferase 2
ALG8	ALG8 alpha-1,3-glucosyltransferase
C17orf75	chromosome 17 open reading frame 75
UBL5	ubiquitin like 5
ABCG4	ATP binding cassette subfamily G member 4
KDELC1	NA
WDR18	WD repeat domain 18
ASB9	ankyrin repeat and SOCS box containing 9
IFIH1	interferon induced with helicase C domain 1
ASPSCR1	ASPSCR1 tether for SLC2A4, UBX domain containing
PRRG4	proline rich and Gla domain 4
NOD2	nucleotide binding oligomerization domain containing 2
TTLL6	tubulin tyrosine ligase like 6
HEXDC	NA
INO80E	INO80 complex subunit E
VWA3A	von Willebrand factor A domain containing 3A
LOC100507634	uncharacterized LOC100507634
CUL2	cullin 2
C8orf58	chromosome 8 open reading frame 58
FAM107B	family with sequence similarity 107 member B
PAX6	paired box 6
PXK	PX domain containing serine/threonine kinase like
RAP1GAP	RAP1 GTPase activating protein
DNMT3A	DNA methyltransferase 3 alpha
IKBKE	inhibitor of nuclear factor kappa B kinase subunit epsilon
MRPS18A	mitochondrial ribosomal protein S18A
RSPH9	radial spoke head component 9
FCMR	Fc fragment of IgM receptor
KCNH8	potassium voltage-gated channel subfamily H member 8
TMEM182	transmembrane protein 182
ZNF513	zinc finger protein 513
RFTN2	raftlin family member 2
TSACC	TSSK6 activating cochaperone
RIOX2	ribosomal oxygenase 2
WDR64	WD repeat domain 64
ZGPAT	zinc finger CCCH-type and G-patch domain containing
NT5C1A	5'-nucleotidase, cytosolic IA
GABPB2	GA binding protein transcription factor subunit beta 2
LOC101926944	uncharacterized LOC101926944
MYADM	myeloid associated differentiation marker
ZNF302	zinc finger protein 302
PRPF40A	pre-mRNA processing factor 40 homolog A
CPA5	carboxypeptidase A5
MED21	mediator complex subunit 21
POLI	DNA polymerase iota
TM2D1	TM2 domain containing 1
PLRG1	pleiotropic regulator 1
CA6	carbonic anhydrase 6
TSPO	translocator protein
PSMA6	proteasome 20S subunit alpha 6
TNFSF13B	TNF superfamily member 13b
B4GALT2	beta-1,4-galactosyltransferase 2
B4GALT3	beta-1,4-galactosyltransferase 3
B4GALT4	beta-1,4-galactosyltransferase 4
MRPL40	mitochondrial ribosomal protein L40
GALNT4	polypeptide N-acetylgalactosaminyltransferase 4
HYAL2	hyaluronidase 2
JRKL	JRK like
SRSF9	serine and arginine rich splicing factor 9
SYK	spleen associated tyrosine kinase
STX10	syntaxin 10
SUV39H1	suppressor of variegation 3-9 homolog 1
STXBP1	syntaxin binding protein 1
VAMP8	vesicle associated membrane protein 8
RPS6KB1	ribosomal protein S6 kinase B1
EIF4G3	eukaryotic translation initiation factor 4 gamma 3
PGLYRP4	peptidoglycan recognition protein 4
CHRNA10	cholinergic receptor nicotinic alpha 10 subunit
NUP107	nucleoporin 107
LPAR5	lysophosphatidic acid receptor 5
GSDMB	gasdermin B
PBK	PDZ binding kinase
LINC00623	long intergenic non-protein coding RNA 623
KMT2E-AS1	KMT2E antisense RNA 1
SUPT7L	SPT7 like, STAGA complex gamma subunit
PXYLP1	2-phosphoxylose phosphatase 1
SLC25A17	solute carrier family 25 member 17
ITGB3BP	integrin subunit beta 3 binding protein
SP140L	SP140 nuclear body protein like
TPRA1	transmembrane protein adipocyte associated 1
TRAT1	T cell receptor associated transmembrane adaptor 1
TLX2	T cell leukemia homeobox 2
ICOSLG	inducible T cell costimulator ligand
GPRIN2	G protein regulated inducer of neurite outgrowth 2
CCDC144A	coiled-coil domain containing 144A
DOCK4	dedicator of cytokinesis 4
PIGN	phosphatidylinositol glycan anchor biosynthesis class N
PPP1R8	protein phosphatase 1 regulatory subunit 8
ZNF770	zinc finger protein 770
SLC43A3	solute carrier family 43 member 3
RAB5A	RAB5A, member RAS oncogene family
NMU	neuromedin U
HCLS1	hematopoietic cell-specific Lyn substrate 1
MTR	5-methyltetrahydrofolate-homocysteine methyltransferase
TMED4	transmembrane p24 trafficking protein 4
U2SURP	U2 snRNP associated SURP domain containing
TAB2	TGF-beta activated kinase 1 (MAP3K7) binding protein 2
LINC01359	long intergenic non-protein coding RNA 1359
FAHD1	fumarylacetoacetate hydrolase domain containing 1
SUCO	SUN domain containing ossification factor
TLE4	TLE family member 4, transcriptional corepressor
SPRY3	sprouty RTK signaling antagonist 3
DIS3	DIS3 homolog, exosome endoribonuclease and 3'-5' exoribonuclease
COMMD9	COMM domain containing 9
USP4	ubiquitin specific peptidase 4
TRPC1	transient receptor potential cation channel subfamily C member 1
LUC7L2	LUC7 like 2, pre-mRNA splicing factor
TFEC	transcription factor EC
AFAP1L1	actin filament associated protein 1 like 1
C1orf198	chromosome 1 open reading frame 198
QPCTL	glutaminyl-peptide cyclotransferase like
EWSR1	EWS RNA binding protein 1
LYRM4	LYR motif containing 4
AKR1C3	aldo-keto reductase family 1 member C3
FAM69A	NA
FOSB	FosB proto-oncogene, AP-1 transcription factor subunit
EPB42	erythrocyte membrane protein band 4.2
CTNNA2	catenin alpha 2
ALDH2	aldehyde dehydrogenase 2 family member
MR1	major histocompatibility complex, class I-related
SOD2	superoxide dismutase 2
MAP1S	microtubule associated protein 1S
PLEKHG6	pleckstrin homology and RhoGEF domain containing G6
FAM86C1	family with sequence similarity 86 member C1
KIAA1551	NA
RPRD1A	regulation of nuclear pre-mRNA domain containing 1A
STAU1	staufen double-stranded RNA binding protein 1
INTS13	integrator complex subunit 13
LHPP	phospholysine phosphohistidine inorganic pyrophosphate phosphatase
ARMH3	armadillo like helical domain containing 3
NEUROG3	neurogenin 3
CACNA1H	calcium voltage-gated channel subunit alpha1 H
PERP	p53 apoptosis effector related to PMP22
OXCT2	3-oxoacid CoA-transferase 2
TMPRSS3	transmembrane serine protease 3
RBM26	RNA binding motif protein 26
TSPYL2	TSPY like 2
FIGNL1	fidgetin like 1
PRDM15	PR/SET domain 15
STX11	syntaxin 11
GNB1L	G protein subunit beta 1 like
CSMD2	CUB and Sushi multiple domains 2
ABR	ABR activator of RhoGEF and GTPase
LIM2	lens intrinsic membrane protein 2
ARFRP1	ADP ribosylation factor related protein 1
MFSD11	major facilitator superfamily domain containing 11
RPS10	ribosomal protein S10
HNRNPR	heterogeneous nuclear ribonucleoprotein R
UNC45B	unc-45 myosin chaperone B
DERA	deoxyribose-phosphate aldolase
RANGAP1	Ran GTPase activating protein 1
ISCU	iron-sulfur cluster assembly enzyme
EAF2	ELL associated factor 2
DGKB	diacylglycerol kinase beta
ZNF148	zinc finger protein 148
BCKDHB	branched chain keto acid dehydrogenase E1 subunit beta
HMGA1	high mobility group AT-hook 1
TAF1B	TATA-box binding protein associated factor, RNA polymerase I subunit B
SRSF11	serine and arginine rich splicing factor 11
HHLA3	HERV-H LTR-associating 3
CLDN5	claudin 5
CFL2	cofilin 2
D2HGDH	D-2-hydroxyglutarate dehydrogenase
UBXN11	UBX domain protein 11
APOL1	apolipoprotein L1
GCSAM	germinal center associated signaling and motility
PPCDC	phosphopantothenoylcysteine decarboxylase
EIF3K	eukaryotic translation initiation factor 3 subunit K
SNX14	sorting nexin 14
AUH	AU RNA binding methylglutaconyl-CoA hydratase
ZNF304	zinc finger protein 304
FOXD2-AS1	FOXD2 adjacent opposite strand RNA 1
LINC00174	long intergenic non-protein coding RNA 174
C7orf13	NA
TYW3	tRNA-yW synthesizing protein 3 homolog
EIF5A	eukaryotic translation initiation factor 5A
ANAPC7	anaphase promoting complex subunit 7
SLC6A2	solute carrier family 6 member 2
NDUFB4	NADH:ubiquinone oxidoreductase subunit B4
TESC	tescalcin
GSN	gelsolin
DLSTP1	dihydrolipoamide S-succinyltransferase pseudogene 1
RABGGTB	Rab geranylgeranyltransferase subunit beta
SNORD45C	small nucleolar RNA, C/D box 45C
SNORD45A	small nucleolar RNA, C/D box 45A
SNORD45B	small nucleolar RNA, C/D box 45B
PRSS36	serine protease 36
PPP1R12A	protein phosphatase 1 regulatory subunit 12A
SNF8	SNF8 subunit of ESCRT-II
FAM57B	NA
ST6GALNAC3	ST6 N-acetylgalactosaminide alpha-2,6-sialyltransferase 3
CDH1	cadherin 1
GNAL	G protein subunit alpha L
ZNF155	zinc finger protein 155
HADHA	hydroxyacyl-CoA dehydrogenase trifunctional multienzyme complex subunit alpha
GUSB	glucuronidase beta
AMPD3	adenosine monophosphate deaminase 3
NR3C1	nuclear receptor subfamily 3 group C member 1
SURF1	SURF1 cytochrome c oxidase assembly factor
CSGALNACT1	chondroitin sulfate N-acetylgalactosaminyltransferase 1
JAKMIP1	janus kinase and microtubule interacting protein 1
CCDC13	coiled-coil domain containing 13
ADA	adenosine deaminase
PMS2	PMS1 homolog 2, mismatch repair system component
XPR1	xenotropic and polytropic retrovirus receptor 1
ZNF25	zinc finger protein 25
TSHZ3	teashirt zinc finger homeobox 3
DLG3	discs large MAGUK scaffold protein 3
MINK1	misshapen like kinase 1
C10orf143	chromosome 10 open reading frame 143
NRBP1	nuclear receptor binding protein 1
IFI44	interferon induced protein 44
CDK2AP2	cyclin dependent kinase 2 associated protein 2
CDCA2	cell division cycle associated 2
KIAA0319	KIAA0319
TOP3A	DNA topoisomerase III alpha
DHRS3	dehydrogenase/reductase 3
SLC16A4	solute carrier family 16 member 4
SUPT6H	SPT6 homolog, histone chaperone and transcription elongation factor
ALDH4A1	aldehyde dehydrogenase 4 family member A1
LINC01725	long intergenic non-protein coding RNA 1725
LOC101927560	uncharacterized LOC101927560
OIP5	Opa interacting protein 5
TMEM25	transmembrane protein 25
NECTIN3	nectin cell adhesion molecule 3
L3MBTL1	L3MBTL histone methyl-lysine binding protein 1
WARS	NA
ZDHHC1	zinc finger DHHC-type containing 1
TRA2A	transformer 2 alpha homolog
ATF5	activating transcription factor 5
AKR7A3	aldo-keto reductase family 7 member A3
CPSF1	cleavage and polyadenylation specific factor 1
CCDC106	coiled-coil domain containing 106
FAM216A	family with sequence similarity 216 member A
PSMC3IP	PSMC3 interacting protein
STYXL1	serine/threonine/tyrosine interacting like 1
ADNP	activity dependent neuroprotector homeobox
A2M	alpha-2-macroglobulin
MARK3	microtubule affinity regulating kinase 3
YBEY	ybeY metalloendoribonuclease
ALDH18A1	aldehyde dehydrogenase 18 family member A1
INPP4A	inositol polyphosphate-4-phosphatase type I A
AHCY	adenosylhomocysteinase
MIR4423	microRNA 4423
GOLM1	golgi membrane protein 1
C1orf52	chromosome 1 open reading frame 52
HPGD	15-hydroxyprostaglandin dehydrogenase
LOC646626	uncharacterized LOC646626
FOXM1	forkhead box M1
RPS6KA5	ribosomal protein S6 kinase A5
RABEP1	rabaptin, RAB GTPase binding effector protein 1
CDKN1A	cyclin dependent kinase inhibitor 1A
ZBTB8A	zinc finger and BTB domain containing 8A
PPP1R2	protein phosphatase 1 regulatory inhibitor subunit 2
GPI	glucose-6-phosphate isomerase
GP1BA	glycoprotein Ib platelet subunit alpha
GNAT1	G protein subunit alpha transducin 1
COL24A1	collagen type XXIV alpha 1 chain
NREP	neuronal regeneration related protein
INTS12	integrator complex subunit 12
ANK1	ankyrin 1
DCUN1D1	defective in cullin neddylation 1 domain containing 1
PPIA	peptidylprolyl isomerase A
NUMBL	NUMB like endocytic adaptor protein
ANKLE1	ankyrin repeat and LEM domain containing 1
LOC105378828	NA
ATP13A2	ATPase cation transporting 13A2
R3HCC1	R3H domain and coiled-coil containing 1
NDUFB11	NADH:ubiquinone oxidoreductase subunit B11
MICB	MHC class I polypeptide-related sequence B
SELENOF	selenoprotein F
LINC01140	long intergenic non-protein coding RNA 1140
BCL11B	BAF chromatin remodeling complex subunit BCL11B
ZNF254	zinc finger protein 254
PKN2-AS1	PKN2 antisense RNA 1
SP3	Sp3 transcription factor
PPARGC1B	PPARG coactivator 1 beta
TJP2	tight junction protein 2
COPZ1	coatomer protein complex subunit zeta 1
KYAT3	kynurenine aminotransferase 3
GBP3	guanylate binding protein 3
RNPEP	arginyl aminopeptidase
HEXA	hexosaminidase subunit alpha
ZEB1	zinc finger E-box binding homeobox 1
ZFYVE19	zinc finger FYVE-type containing 19
FLT3	fms related tyrosine kinase 3
GBP1P1	guanylate binding protein 1 pseudogene 1
RAB30	RAB30, member RAS oncogene family
LRRC8C-DT	LRRC8C divergent transcript
GEMIN8P4	gem nuclear organelle associated protein 8 pseudogene 4
FEN1	flap structure-specific endonuclease 1
OSMR	oncostatin M receptor
LOC105378853	NA
DGKI	diacylglycerol kinase iota
RHOH	ras homolog family member H
CTDP1	CTD phosphatase subunit 1
DYRK1B	dual specificity tyrosine phosphorylation regulated kinase 1B
NEMF	nuclear export mediator factor
VAV3	vav guanine nucleotide exchange factor 3
SESN2	sestrin 2
PARP9	poly(ADP-ribose) polymerase family member 9
ZMIZ2	zinc finger MIZ-type containing 2
NAA16	N(alpha)-acetyltransferase 16, NatA auxiliary subunit
MCM10	minichromosome maintenance 10 replication initiation factor
LRRC59	leucine rich repeat containing 59
TMCO6	transmembrane and coiled-coil domains 6
CBWD1	COBW domain containing 1
TRMT10C	tRNA methyltransferase 10C, mitochondrial RNase P subunit
ORAI2	ORAI calcium release-activated calcium modulator 2
GLT8D1	glycosyltransferase 8 domain containing 1
SELENOS	selenoprotein S
PDP1	pyruvate dehyrogenase phosphatase catalytic subunit 1
MKL1	NA
RPA1	replication protein A1
SHISA5	shisa family member 5
ABI1	abl interactor 1
CNTN2	contactin 2
IL11RA	interleukin 11 receptor subunit alpha
HPSE2	heparanase 2 (inactive)
OCIAD2	OCIA domain containing 2
TMED5	transmembrane p24 trafficking protein 5
SMYD5	SMYD family member 5
CCDC18-AS1	CCDC18 antisense RNA 1
RIC8B	RIC8 guanine nucleotide exchange factor B
LMNA	lamin A/C
LIMK2	LIM domain kinase 2
CSNK2A3	casein kinase 2 alpha 3
IL15RA	interleukin 15 receptor subunit alpha
LOC100129046	NA
SLC50A1	solute carrier family 50 member 1
ZNF708	zinc finger protein 708
SLC25A40	solute carrier family 25 member 40
ANO10	anoctamin 10
NSFL1C	NSFL1 cofactor
ATG16L1	autophagy related 16 like 1
TRIM68	tripartite motif containing 68
FANCL	FA complementation group L
IARS2	isoleucyl-tRNA synthetase 2, mitochondrial
SLC6A15	solute carrier family 6 member 15
NODAL	nodal growth differentiation factor
XKR8	XK related 8
VAC14	VAC14 component of PIKFYVE complex
CCDC40	coiled-coil domain containing 40
SYBU	syntabulin
ZNF780A	zinc finger protein 780A
IMPDH1	inosine monophosphate dehydrogenase 1
PALLD	palladin, cytoskeletal associated protein
PLEKHA8	pleckstrin homology domain containing A8
CCNT1	cyclin T1
TRAF3IP2-AS1	TRAF3IP2 antisense RNA 1
DCAKD	dephospho-CoA kinase domain containing
CLEC4M	C-type lectin domain family 4 member M
DAB2IP	DAB2 interacting protein
TWNK	twinkle mtDNA helicase
MOV10L1	Mov10 like RISC complex RNA helicase 1
DMKN	dermokine
SNX7	sorting nexin 7
SPATA13	spermatogenesis associated 13
GALNT13	polypeptide N-acetylgalactosaminyltransferase 13
ZNF2	zinc finger protein 2
NPHP4	nephrocystin 4
DYNLT1	dynein light chain Tctex-type 1
TMEM106A	transmembrane protein 106A
TRAPPC12	trafficking protein particle complex 12
TRIM37	tripartite motif containing 37
NBR1	NBR1 autophagy cargo receptor
YTHDC2	YTH domain containing 2
IFITM1	interferon induced transmembrane protein 1
CWC27	CWC27 spliceosome associated cyclophilin
TRMT13	tRNA methyltransferase 13 homolog
COPS2	COP9 signalosome subunit 2
TGFB1I1	transforming growth factor beta 1 induced transcript 1
MSH6	mutS homolog 6
RTCA-AS1	RTCA antisense RNA 1
SGK1	serum/glucocorticoid regulated kinase 1
MIR553	microRNA 553
RREB1	ras responsive element binding protein 1
FAXC	failed axon connections homolog, metaxin like GST domain containing
FBXO11	F-box protein 11
WDR19	WD repeat domain 19
FUZ	fuzzy planar cell polarity protein
HKDC1	hexokinase domain containing 1
PRIMPOL	primase and DNA directed polymerase
KLHL24	kelch like family member 24
LOC102606465	uncharacterized LOC102606465
LOC101928370	uncharacterized LOC101928370
ANKRD9	ankyrin repeat domain 9
ELAC2	elaC ribonuclease Z 2
ZNF746	zinc finger protein 746
CPA4	carboxypeptidase A4
SMIM10	small integral membrane protein 10
TMEM62	transmembrane protein 62
MCOLN1	mucolipin 1
SPINK2	serine peptidase inhibitor, Kazal type 2
RECK	reversion inducing cysteine rich protein with kazal motifs
KIAA1217	KIAA1217
TWF1	twinfilin actin binding protein 1
SUPT4H1	SPT4 homolog, DSIF elongation factor subunit
CDKN2B-AS1	CDKN2B antisense RNA 1
SNX4	sorting nexin 4
REV1	REV1 DNA directed polymerase
C2orf74	chromosome 2 open reading frame 74
ACTG1P4	actin gamma 1 pseudogene 4
CD9	CD9 molecule
IL12RB2	interleukin 12 receptor subunit beta 2
HOXB3	homeobox B3
SLC35F5	solute carrier family 35 member F5
COPS4	COP9 signalosome subunit 4
PRKAG2	protein kinase AMP-activated non-catalytic subunit gamma 2
MAD1L1	mitotic arrest deficient 1 like 1
ZNF891	zinc finger protein 891
IGSF9B	immunoglobulin superfamily member 9B
PGAP2	post-GPI attachment to proteins 2
ZNF330	zinc finger protein 330
RBMS3	RNA binding motif single stranded interacting protein 3
APEX2	apurinic/apyrimidinic endodeoxyribonuclease 2
ZNF544	zinc finger protein 544
CRCP	CGRP receptor component
ARMC9	armadillo repeat containing 9
CCDC92	coiled-coil domain containing 92
PROSER1	proline and serine rich 1
OPA3	outer mitochondrial membrane lipid metabolism regulator OPA3
FHOD3	formin homology 2 domain containing 3
SAT2	spermidine/spermine N1-acetyltransferase family member 2
FGD5	FYVE, RhoGEF and PH domain containing 5
A2ML1	alpha-2-macroglobulin like 1
MAPK1IP1L	mitogen-activated protein kinase 1 interacting protein 1 like
CCDC114	coiled-coil domain containing 114
CDK1	cyclin dependent kinase 1
MYO1C	myosin IC
TMEM167B	transmembrane protein 167B
SCARNA2	small Cajal body-specific RNA 2
PLXNB3	plexin B3
TRAM1	translocation associated membrane protein 1
GFM1	G elongation factor mitochondrial 1
TMC5	transmembrane channel like 5
KLK14	kallikrein related peptidase 14
SLC22A23	solute carrier family 22 member 23
EEFSEC	eukaryotic elongation factor, selenocysteine-tRNA specific
GPRC5C	G protein-coupled receptor class C group 5 member C
ATG101	autophagy related 101
ZBTB26	zinc finger and BTB domain containing 26
RIC8A	RIC8 guanine nucleotide exchange factor A
DHX35	DEAH-box helicase 35
INTS8	integrator complex subunit 8
FXYD7	FXYD domain containing ion transport regulator 7
ADD3	adducin 3
PPM1A	protein phosphatase, Mg2+/Mn2+ dependent 1A
GPAM	glycerol-3-phosphate acyltransferase, mitochondrial
HIST1H3F	NA
PLXNA4	plexin A4
UBC	ubiquitin C
SCN2A	sodium voltage-gated channel alpha subunit 2
DPH7	diphthamide biosynthesis 7
FKBP3	FKBP prolyl isomerase 3
CUX1	cut like homeobox 1
HES6	hes family bHLH transcription factor 6
CHST12	carbohydrate sulfotransferase 12
WSB2	WD repeat and SOCS box containing 2
ETNK1	ethanolamine kinase 1
CSGALNACT2	chondroitin sulfate N-acetylgalactosaminyltransferase 2
CAMK2N1	calcium/calmodulin dependent protein kinase II inhibitor 1
STRADB	STE20 related adaptor beta
AP1AR	adaptor related protein complex 1 associated regulatory protein
USP49	ubiquitin specific peptidase 49
GPALPP1	GPALPP motifs containing 1
GPR158	G protein-coupled receptor 158
SLTM	SAFB like transcription modulator
INTS2	integrator complex subunit 2
TKFC	triokinase and FMN cyclase
POLR2M	RNA polymerase II subunit M
C2CD3	C2 domain containing 3 centriole elongation regulator
BRCA1	BRCA1 DNA repair associated
REXO2	RNA exonuclease 2
MAGI1	membrane associated guanylate kinase, WW and PDZ domain containing 1
HINFP	histone H4 transcription factor
TSKU	tsukushi, small leucine rich proteoglycan
ABCB4	ATP binding cassette subfamily B member 4
PEG10	paternally expressed 10
FAN1	FANCD2 and FANCI associated nuclease 1
EPN2	epsin 2
PNMA2	PNMA family member 2
NECAP1	NECAP endocytosis associated 1
DHRS7B	dehydrogenase/reductase 7B
TIPARP	TCDD inducible poly(ADP-ribose) polymerase
TMEM87A	transmembrane protein 87A
SLC35E3	solute carrier family 35 member E3
GHRL	ghrelin and obestatin prepropeptide
ZNF658	zinc finger protein 658
MON1A	MON1 homolog A, secretory trafficking associated
BET1	Bet1 golgi vesicular membrane trafficking protein
PBXIP1	PBX homeobox interacting protein 1
EFCAB2	EF-hand calcium binding domain 2
NRG1	neuregulin 1
PITX2	paired like homeodomain 2
RPL10	ribosomal protein L10
APOBEC3F	apolipoprotein B mRNA editing enzyme catalytic subunit 3F
PTPDC1	protein tyrosine phosphatase domain containing 1
DUSP15	dual specificity phosphatase 15
RTTN	rotatin
ARL5A	ADP ribosylation factor like GTPase 5A
PPM1G	protein phosphatase, Mg2+/Mn2+ dependent 1G
ARL6	ADP ribosylation factor like GTPase 6
CASC4	cancer susceptibility 4
ST3GAL4	ST3 beta-galactoside alpha-2,3-sialyltransferase 4
NUDT16L1	nudix hydrolase 16 like 1
TMEM116	transmembrane protein 116
PIK3C2A	phosphatidylinositol-4-phosphate 3-kinase catalytic subunit type 2 alpha
FBXL2	F-box and leucine rich repeat protein 2
FOXP1	forkhead box P1
UIMC1	ubiquitin interaction motif containing 1
CEPT1	choline/ethanolamine phosphotransferase 1
TJAP1	tight junction associated protein 1
ACYP2	acylphosphatase 2
MST1R	macrophage stimulating 1 receptor
CLCN5	chloride voltage-gated channel 5
MBIP	MAP3K12 binding inhibitory protein 1
IRAK3	interleukin 1 receptor associated kinase 3
FAM111A	family with sequence similarity 111 member A
SULT2B1	sulfotransferase family 2B member 1
STX1A	syntaxin 1A
PSMG3-AS1	PSMG3 antisense RNA 1 (head to head)
SGPP2	sphingosine-1-phosphate phosphatase 2
ARMCX4	armadillo repeat containing X-linked 4
ELOVL1	ELOVL fatty acid elongase 1
ZBTB7B	zinc finger and BTB domain containing 7B
FAM212B-AS1	NA
LOC101928718	uncharacterized LOC101928718
EMP2	epithelial membrane protein 2
EMP1	epithelial membrane protein 1
HPS4	HPS4 biogenesis of lysosomal organelles complex 3 subunit 2
ZNF654	zinc finger protein 654
GRIK1	glutamate ionotropic receptor kainate type subunit 1
BOLA1	bolA family member 1
C1orf109	chromosome 1 open reading frame 109
PRPF38B	pre-mRNA processing factor 38B
CARS	NA
SLC16A1-AS1	SLC16A1 antisense RNA 1
PNPLA6	patatin like phospholipase domain containing 6
UFM1	ubiquitin fold modifier 1
GARNL3	GTPase activating Rap/RanGAP domain like 3
PRR22	proline rich 22
HK1	hexokinase 1
HGD	homogentisate 1,2-dioxygenase
CFH	complement factor H
ARSA	arylsulfatase A
APRT	adenine phosphoribosyltransferase
MVK	mevalonate kinase
GRINA	glutamate ionotropic receptor NMDA type subunit associated protein 1
PHTF1	putative homeodomain transcription factor 1
LRRC34	leucine rich repeat containing 34
ZNF555	zinc finger protein 555
DPY19L3	dpy-19 like C-mannosyltransferase 3
DNAI2	dynein axonemal intermediate chain 2
SLC30A8	solute carrier family 30 member 8
PGM1	phosphoglucomutase 1
RSBN1	round spermatid basic protein 1
AP4B1-AS1	AP4B1 antisense RNA 1
TADA2A	transcriptional adaptor 2A
ADCY10	adenylate cyclase 10
MFF	mitochondrial fission factor
SP140	SP140 nuclear body protein
FGFR3	fibroblast growth factor receptor 3
UBE2J1	ubiquitin conjugating enzyme E2 J1
DLEC1	DLEC1 cilia and flagella associated protein
KLRD1	killer cell lectin like receptor D1
KLRC3	killer cell lectin like receptor C3
IMMT	inner membrane mitochondrial protein
COPS5	COP9 signalosome subunit 5
COPS6	COP9 signalosome subunit 6
FERMT2	fermitin family member 2
UQCR11	ubiquinol-cytochrome c reductase, complex III subunit XI
KLF12	Kruppel like factor 12
DUSP12	dual specificity phosphatase 12
KLHL2	kelch like family member 2
ATXN2L	ataxin 2 like
DDX19B	DEAD-box helicase 19B
HSPA12A	heat shock protein family A (Hsp70) member 12A
MSL3	MSL complex subunit 3
CDKN2C	cyclin dependent kinase inhibitor 2C
ADRA1A	adrenoceptor alpha 1A
RORA	RAR related orphan receptor A
DHPS	deoxyhypusine synthase
ANK2	ankyrin 2
PIGC	phosphatidylinositol glycan anchor biosynthesis class C
HNRNPA2B1	heterogeneous nuclear ribonucleoprotein A2/B1
DMD	dystrophin
KLHL28	kelch like family member 28
LINC01762	long intergenic non-protein coding RNA 1762
INPP5F	inositol polyphosphate-5-phosphatase F
ARHGEF9	Cdc42 guanine nucleotide exchange factor 9
TBC1D1	TBC1 domain family member 1
SESN1	sestrin 1
PRKACB	protein kinase cAMP-activated catalytic subunit beta
TMEM63C	transmembrane protein 63C
PARVG	parvin gamma
LOC101929099	uncharacterized LOC101929099
ANAPC10	anaphase promoting complex subunit 10
PRDM11	PR/SET domain 11
PCDHGB1	protocadherin gamma subfamily B, 1
C11orf71	chromosome 11 open reading frame 71
RIMS1	regulating synaptic membrane exocytosis 1
AKT1S1	AKT1 substrate 1
TGFBRAP1	transforming growth factor beta receptor associated protein 1
SLC22A13	solute carrier family 22 member 13
IL1R1	interleukin 1 receptor type 1
IFNLR1	interferon lambda receptor 1
TBX3	T-box transcription factor 3
LOC101929147	NA
CEACAM21	CEA cell adhesion molecule 21
TRIM2	tripartite motif containing 2
HSD3BP4	hydroxy-delta-5-steroid dehydrogenase, 3 beta, pseudogene 4
CTNNA1	catenin alpha 1
STX7	syntaxin 7
SLC4A3	solute carrier family 4 member 3
LOC100996724	phosphodiesterase 4D interacting protein-like
RNVU1-19	RNA, variant U1 small nuclear 19
CFAP61	cilia and flagella associated protein 61
LNPEP	leucyl and cystinyl aminopeptidase
OTUD5	OTU deubiquitinase 5
HIST2H2BA	NA
CCM2	CCM2 scaffold protein
VANGL1	VANGL planar cell polarity protein 1
KRR1	KRR1 small subunit processome component homolog
LOC645166	NA
DCTN1	dynactin subunit 1
FAM72C	family with sequence similarity 72 member C
SRGAP2D	SLIT-ROBO Rho GTPase activating protein 2D (pseudogene)
GINS3	GINS complex subunit 3
RNVU1-15	RNA, variant U1 small nuclear 15
CXCR3	C-X-C motif chemokine receptor 3
GP2	glycoprotein 2
GNRH2	gonadotropin releasing hormone 2
GATM	glycine amidinotransferase
ACOXL	acyl-CoA oxidase like
ZNF185	zinc finger protein 185 with LIM domain
PDE4B	phosphodiesterase 4B
MTHFR	methylenetetrahydrofolate reductase
LOC103091866	NA
RNVU1-14	RNA, variant U1 small nuclear 14
CAPN2	calpain 2
PPP2R2B	protein phosphatase 2 regulatory subunit Bbeta
METTL2A	methyltransferase like 2A
TMEM119	transmembrane protein 119
MICU3	mitochondrial calcium uptake family member 3
TMCO4	transmembrane and coiled-coil domains 4
ARHGAP30	Rho GTPase activating protein 30
ASPHD1	aspartate beta-hydroxylase domain containing 1
CENPV	centromere protein V
LCA5	lebercilin LCA5
UBXN2A	UBX domain protein 2A
HFE	homeostatic iron regulator
CANT1	calcium activated nucleotidase 1
MRRF	mitochondrial ribosome recycling factor
SLC25A46	solute carrier family 25 member 46
BAX	BCL2 associated X, apoptosis regulator
ABCD4	ATP binding cassette subfamily D member 4
ARHGEF2	Rho/Rac guanine nucleotide exchange factor 2
RBFOX2	RNA binding fox-1 homolog 2
FKTN	fukutin
COL18A1	collagen type XVIII alpha 1 chain
GNRHR2	gonadotropin releasing hormone receptor 2 (pseudogene)
SPAG8	sperm associated antigen 8
LINC01719	long intergenic non-protein coding RNA 1719
ASPDH	aspartate dehydrogenase domain containing
SZRD1	SUZ RNA binding domain containing 1
DHX36	DEAH-box helicase 36
CNTLN	centlein
PAPD4	NA
UPK3BL1	uroplakin 3B like 1
DDX3X	DEAD-box helicase 3 X-linked
TUBA8	tubulin alpha 8
PTPA	protein phosphatase 2 phosphatase activator
TERT	telomerase reverse transcriptase
HYDIN2	HYDIN axonemal central pair apparatus protein 2 (pseudogene)
IDI2-AS1	IDI2 antisense RNA 1
TIAM1	TIAM Rac1 associated GEF 1
NUDT1	nudix hydrolase 1
TGM2	transglutaminase 2
VSIG2	V-set and immunoglobulin domain containing 2
RGL1	ral guanine nucleotide dissociation stimulator like 1
CALM3	calmodulin 3
TROVE2	NA
CDCA3	cell division cycle associated 3
ALKBH6	alkB homolog 6
SERPINB6	serpin family B member 6
PDP2	pyruvate dehyrogenase phosphatase catalytic subunit 2
PPP1R12B	protein phosphatase 1 regulatory subunit 12B
C1orf43	chromosome 1 open reading frame 43
TMCC2	transmembrane and coiled-coil domain family 2
ZNF417	zinc finger protein 417
SLC19A2	solute carrier family 19 member 2
RTL6	retrotransposon Gag like 6
ZDHHC18	zinc finger DHHC-type containing 18
MIR7-1	microRNA 7-1
ATP7A	ATPase copper transporting alpha
FBXL5	F-box and leucine rich repeat protein 5
VDAC1	voltage dependent anion channel 1
PAX5	paired box 5
VPS29	VPS29 retromer complex component
HSH2D	hematopoietic SH2 domain containing
SLC6A9	solute carrier family 6 member 9
LYST	lysosomal trafficking regulator
CRIP2	cysteine rich protein 2
SNRPD3	small nuclear ribonucleoprotein D3 polypeptide
SON	SON DNA binding protein
DHFR	dihydrofolate reductase
HIVEP3	HIVEP zinc finger 3
NDUFA7	NADH:ubiquinone oxidoreductase subunit A7
CCDC174	coiled-coil domain containing 174
SLC4A7	solute carrier family 4 member 7
LINC00624	long intergenic non-protein coding RNA 624
EFTUD2	elongation factor Tu GTP binding domain containing 2
ACP6	acid phosphatase 6, lysophosphatidic
OCRL	OCRL inositol polyphosphate-5-phosphatase
KBTBD4	kelch repeat and BTB domain containing 4
ZNF532	zinc finger protein 532
WDR46	WD repeat domain 46
RNVU1-7	RNA, variant U1 small nuclear 7
SMARCC2	SWI/SNF related, matrix associated, actin dependent regulator of chromatin subfamily c member 2
CYTH3	cytohesin 3
IL32	interleukin 32
NBPF11	NBPF member 11
MIR5087	microRNA 5087
RNVU1-1	RNA, variant U1 small nuclear 1
LOC100132057	phosphodiesterase 4D interacting protein pseudogene
RNVU1-3	RNA, variant U1 small nuclear 3
TTC21A	tetratricopeptide repeat domain 21A
KIFC2	kinesin family member C2
PHLDB2	pleckstrin homology like domain family B member 2
TRIP12	thyroid hormone receptor interactor 12
PCNP	PEST proteolytic signal containing nuclear protein
USP48	ubiquitin specific peptidase 48
ASCC1	activating signal cointegrator 1 complex subunit 1
C3orf18	chromosome 3 open reading frame 18
GBP1	guanylate binding protein 1
GATA1	GATA binding protein 1
E2F4	E2F transcription factor 4
GAS1	growth arrest specific 1
DUSP7	dual specificity phosphatase 7
CD320	CD320 molecule
SLC12A4	solute carrier family 12 member 4
TSC2	TSC complex subunit 2
UBA5	ubiquitin like modifier activating enzyme 5
LINC00869	long intergenic non-protein coding RNA 869
TBC1D23	TBC1 domain family member 23
ALOX5AP	arachidonate 5-lipoxygenase activating protein
AKT2	AKT serine/threonine kinase 2
HIST2H2BC	NA
RPL36AL	ribosomal protein L36a like
RPL39	ribosomal protein L39
MGAT1	alpha-1,3-mannosyl-glycoprotein 2-beta-N-acetylglucosaminyltransferase
SLC31A1	solute carrier family 31 member 1
MGAT2	alpha-1,6-mannosyl-glycoprotein 2-beta-N-acetylglucosaminyltransferase
MEF2C	myocyte enhancer factor 2C
VLDLR	very low density lipoprotein receptor
RAB29	RAB29, member RAS oncogene family
VIPR2	vasoactive intestinal peptide receptor 2
SKAP2	src kinase associated phosphoprotein 2
44443	NA
GLUD1	glutamate dehydrogenase 1
LOC105371433	uncharacterized LOC105371433
ARHGEF3	Rho guanine nucleotide exchange factor 3
MACROD2	mono-ADP ribosylhydrolase 2
FBXO28	F-box protein 28
GRHL2	grainyhead like transcription factor 2
MRPS15	mitochondrial ribosomal protein S15
RNF17	ring finger protein 17
PHC3	polyhomeotic homolog 3
TEX12	testis expressed 12
RBCK1	RANBP2-type and C3HC4-type zinc finger containing 1
DFFB	DNA fragmentation factor subunit beta
ARHGAP20	Rho GTPase activating protein 20
NDUFAF7	NADH:ubiquinone oxidoreductase complex assembly factor 7
SNIP1	Smad nuclear interacting protein 1
ZFP2	ZFP2 zinc finger protein
STARD13	StAR related lipid transfer domain containing 13
MMAB	metabolism of cobalamin associated B
OBSCN	obscurin, cytoskeletal calmodulin and titin-interacting RhoGEF
ADAMTSL4-AS1	ADAMTSL4 antisense RNA 1
LAMTOR4	late endosomal/lysosomal adaptor, MAPK and MTOR activator 4
NIT1	nitrilase 1
PLCL1	phospholipase C like 1 (inactive)
PLTP	phospholipid transfer protein
POLD2	DNA polymerase delta 2, accessory subunit
DNM1L	dynamin 1 like
DPP3	dipeptidyl peptidase 3
ODR4	odr-4 GPCR localization factor homolog
ABCC5	ATP binding cassette subfamily C member 5
GPR55	G protein-coupled receptor 55
ADGRG1	adhesion G protein-coupled receptor G1
TAF1A	TATA-box binding protein associated factor, RNA polymerase I subunit A
APOA1	apolipoprotein A1
BCL2L1	BCL2 like 1
SPAG4	sperm associated antigen 4
UAP1	UDP-N-acetylglucosamine pyrophosphorylase 1
SPAG1	sperm associated antigen 1
PDGFA	platelet derived growth factor subunit A
PDE9A	phosphodiesterase 9A
PDE8A	phosphodiesterase 8A
SP2	Sp2 transcription factor
ALK	ALK receptor tyrosine kinase
ARHGEF1	Rho guanine nucleotide exchange factor 1
FAM122C	family with sequence similarity 122C
RANBP3L	RAN binding protein 3 like
ANKRD35	ankyrin repeat domain 35
MXRA7	matrix remodeling associated 7
WDR73	WD repeat domain 73
KLRF1	killer cell lectin like receptor F1
CD24	CD24 molecule
ZCCHC9	zinc finger CCHC-type containing 9
PPP6R2	protein phosphatase 6 regulatory subunit 2
NSUN6	NOP2/Sun RNA methyltransferase 6
TCTEX1D2	Tctex1 domain containing 2
LDHB	lactate dehydrogenase B
INSM1	INSM transcriptional repressor 1
ITGA5	integrin subunit alpha 5
ORC6	origin recognition complex subunit 6
HEBP2	heme binding protein 2
ICE2	interactor of little elongation complex ELL subunit 2
HSPBAP1	HSPB1 associated protein 1
ETAA1	ETAA1 activator of ATR kinase
MAP7D3	MAP7 domain containing 3
SUCNR1	succinate receptor 1
MYBPC1	myosin binding protein C, slow type
LOC100507670	NA
MAST4	microtubule associated serine/threonine kinase family member 4
HEXIM2	HEXIM P-TEFb complex subunit 2
ACSS1	acyl-CoA synthetase short chain family member 1
GBAT2	glioblastoma multiforme-associated transcript 2
MX1	MX dynamin like GTPase 1
PSMB5	proteasome 20S subunit beta 5
NR1H3	nuclear receptor subfamily 1 group H member 3
PPP2R5D	protein phosphatase 2 regulatory subunit B'delta
ZNF692	zinc finger protein 692
ERAL1	Era like 12S mitochondrial rRNA chaperone 1
PPP2R5A	protein phosphatase 2 regulatory subunit B'alpha
PPP1R3D	protein phosphatase 1 regulatory subunit 3D
PPEF2	protein phosphatase with EF-hand domain 2
CLCC1	chloride channel CLIC like 1
ZNRD1	zinc ribbon domain containing 1
TAX1BP3	Tax1 binding protein 3
SEMA3E	semaphorin 3E
NOL4L	nucleolar protein 4 like
FAM98C	family with sequence similarity 98 member C
DZANK1	double zinc ribbon and ankyrin repeat domains 1
ZNF787	zinc finger protein 787
MRPL9	mitochondrial ribosomal protein L9
ABLIM2	actin binding LIM protein family member 2
STOML2	stomatin like 2
CTBP2	C-terminal binding protein 2
TSPAN10	tetraspanin 10
VPS11	VPS11 core subunit of CORVET and HOPS complexes
TDRKH-AS1	TDRKH antisense RNA 1
SPI1	Spi-1 proto-oncogene
UTY	ubiquitously transcribed tetratricopeptide repeat containing, Y-linked
OIP5-AS1	OIP5 antisense RNA 1
PIGL	phosphatidylinositol glycan anchor biosynthesis class L
CDAN1	codanin 1
NLRP11	NLR family pyrin domain containing 11
SUSD3	sushi domain containing 3
FLG-AS1	FLG antisense RNA 1
SAXO1	stabilizer of axonemal microtubules 1
RPS9	ribosomal protein S9
PDGFB	platelet derived growth factor subunit B
C16orf71	chromosome 16 open reading frame 71
GABRB3	gamma-aminobutyric acid type A receptor beta3 subunit
SPECC1	sperm antigen with calponin homology and coiled-coil domains 1
STARD4	StAR related lipid transfer domain containing 4
ALS2CR12	NA
CRB3	crumbs cell polarity complex component 3
DEPDC7	DEP domain containing 7
NEK7	NIMA related kinase 7
CCDC6	coiled-coil domain containing 6
PRMT2	protein arginine methyltransferase 2
ARHGAP26	Rho GTPase activating protein 26
REEP5	receptor accessory protein 5
LOC101928034	uncharacterized LOC101928034
TMEM254	transmembrane protein 254
ETNK2	ethanolamine kinase 2
SETD7	SET domain containing 7, histone lysine methyltransferase
MOSPD1	motile sperm domain containing 1
ARHGEF6	Rac/Cdc42 guanine nucleotide exchange factor 6
PHF21B	PHD finger protein 21B
CDK11B	cyclin dependent kinase 11B
RIC3	RIC3 acetylcholine receptor chaperone
MAP2K3	mitogen-activated protein kinase kinase 3
BSPRY	B-box and SPRY domain containing
PRUNE2	prune homolog 2 with BCH domain
ATP2A2	ATPase sarcoplasmic/endoplasmic reticulum Ca2+ transporting 2
LRRFIP1	LRR binding FLII interacting protein 1
CREB3L4	cAMP responsive element binding protein 3 like 4
TMX2	thioredoxin related transmembrane protein 2
FAM76A	family with sequence similarity 76 member A
SLAMF7	SLAM family member 7
PTGES3	prostaglandin E synthase 3
MADD	MAP kinase activating death domain
ADAMTS15	ADAM metallopeptidase with thrombospondin type 1 motif 15
TAF5	TATA-box binding protein associated factor 5
IL5RA	interleukin 5 receptor subunit alpha
HILPDA	hypoxia inducible lipid droplet associated
SFTPA2	surfactant protein A2
CEP78	centrosomal protein 78
APBB2	amyloid beta precursor protein binding family B member 2
PFKFB4	6-phosphofructo-2-kinase/fructose-2,6-biphosphatase 4
PALM2	NA
SHKBP1	SH3KBP1 binding protein 1
DCST2	DC-STAMP domain containing 2
ZNF260	zinc finger protein 260
SBSN	suprabasin
TMEM2	NA
DCAF6	DDB1 and CUL4 associated factor 6
[truncated: 15,678 more rows]
