# Supplementary material for: An In-Vitro Study of the Expansion and Transcriptomics of CD4+ and CD8+ Naïve and Memory T Cells Stimulated by IL-2, IL-7 and IL-15
Source: Cells. 2022 May 20;11(10):1701. doi: 10.3390/cells11101701 (PMC9139303; doi:10.3390/cells11101701)
Supplement: Supplementary file 1 [file cells-11-01701-s001.zip › Supplementary Material S4_Shared genes up_down for all phenotypes.xlsx]

## Sheet: Sheet1
Genes Shared Between CD4+ Naïve & CD8 Naïve							Genes Shared Between CD4+ Memory & CD8+ Memory							Genes Shared Between CD4+ Naïve & CD4+ Memory							Genes Shared Between CD8+ Naïve & CD8+ Memory
UP IL2 (i.e. genes UPregulated by IL2)	DOWN IL2	UP IL7	DOWN IL7	UP IL15	DOWN IL15		UP IL2	DOWN IL2	UP IL7	DOWN IL7	UP IL15	DOWN IL15		UP IL2	DOWN IL2	UP IL7	DOWN IL7	UP IL15	DOWN IL15		UP IL2	DOWN IL2	UP IL7	DOWN IL7	UP IL15	DOWN IL15
		CMPK2		ERC2	ADRA2C		BEND3P3		BEND3P3	MIR571	MAP2K4P1	RNASE2		PTOV1-AS1		CMPK2	LOC105372795	BASP1	LOC102725254		JCHAIN		ADGRV1	SNORA38B		MIR6791
		LOC102723665		FKBP1AP1			LOC101928424		BST1					SNORD111B		IQSEC3		BFSP1	MIR5585				ANP32AP1
		LOC105377975							EHD4-AS1							RSAD2		DUBR	MIR6840				CD1C
		PARP9							H3F3C										RXRB				DKFZP434K028
		RSAD2							KCNH8							PTOV1-AS1							LINC01754
		ERC2							KLHL33							SNORD111B							LOC101927539
		FKBP1AP1							LINC02255							LOC105372795							LOC101927914
		ADRA2C							LOC101928103							BASP1							LOC102723665
									LOC101928424							BFSP1							LOC441087
									LOC729296							DUBR							SALL4
									LOC729970							LOC102725254							THEGL
									MCM8-AS1							MIR5585							TRIM67
									MIR3681HG							MIR6840							JCHAIN
									MYH16							RXRB							SNORA38B
									PTPRN														MIR6791
									TEX45
									BEND3P3
									LOC101928424
									MIR571
									MAP2K4P1
									RNASE2
